# Supplementary material for: Genetically encoded Nδ-vinyl histidine for the evolution of enzyme catalytic center
Source: PubMed Central journal article supplement (PMC11231154; doi:10.1038/s41467-024-50005-9), 2024-07-08
Supplement: 41467_2024_50005_MOESM1_ESM.pdf [file 41467_2024_50005_MOESM1_ESM.pdf]

## Supplementary Information

### **Genetically Encoded N $\delta$ -Vinyl Histidine for the Evolution of Enzyme Catalytic Center**

Haoran Huang<sup>†, #</sup>, Tao Yan<sup>†, #</sup>, Chang Liu<sup>†, #</sup>, Yuxiang Lu<sup>†</sup>, Zhigang Wu<sup>†</sup>, Xingchu Wang<sup>†</sup>, Jie Wang<sup>†, \*</sup>

<sup>†</sup>Department of Chemistry, Research Center for Chemical Biology and Omics Analysis, College of Science, Guangdong Provincial Key Laboratory of Catalysis, Southern University of Science and Technology, Shenzhen 518055, China

<sup>#</sup>These authors contributed equally to this work.

\*Correspondence to: wangjie@sustech.edu.cn (J.W.)

|                                                                                                |           |
|------------------------------------------------------------------------------------------------|-----------|
| <b>Supplementary Methods</b> .....                                                             | <b>1</b>  |
| 1. Chemical synthesis of N $\delta$ -vinyl histidine ( $\delta$ Vin-H).....                    | 1         |
| 2. Chemical synthesis of resorufin acetyl methoxymethyl ether (A-Me-Res).....                  | 2         |
| 3. Chemical synthesis of ethyl 2-(dimethyl(phenyl)silyl) acetate by whole-cell catalysis ..... | 2         |
| <b>Supplementary Figures (1-58)</b> .....                                                      | <b>3</b>  |
| <b>Supplementary Tables (1-6)</b> .....                                                        | <b>66</b> |
| <b>Supplementary References</b> .....                                                          | <b>80</b> |

## Supplementary Methods

### 1. Chemical synthesis of N $\delta$ -vinyl histidine ( $\delta$ Vin-H)

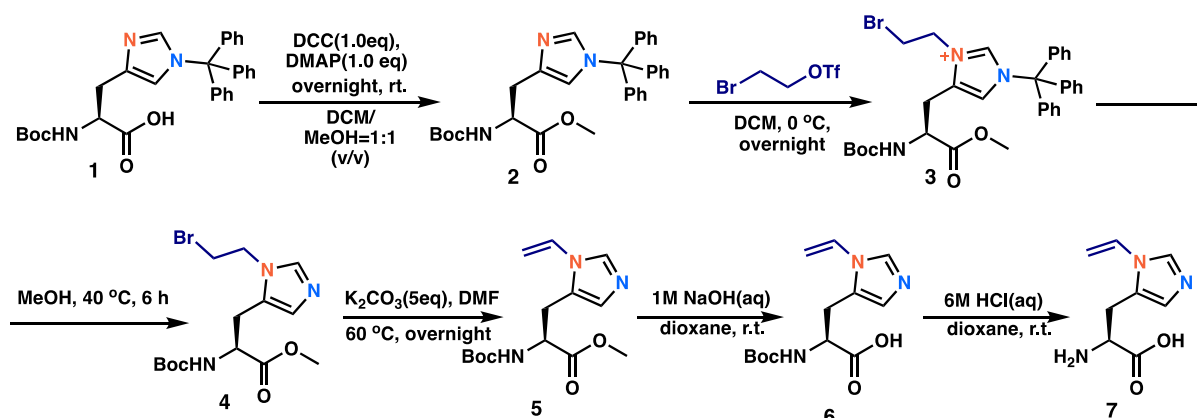

MeOH (100 mL) was added to a stirred solution of protected histidine **1** (50 mmol), DCC (55 mmol), and DMAP (50 mmol) in DCM (50 mL) in an ice bath. The reaction mixture was gradually warmed to room temperature and stirred for 12 hours. The completion of the reaction was monitored by TLC. After completion, the mixture was concentrated under reduced pressure, dissolved in EtOAc, and filtered through a Celite pad. The filtrate was evaporated and purified by flash column chromatography to give product **2** (yield: 90%). <sup>1</sup>H NMR (400 MHz, CDCl<sub>3</sub>)  $\delta$  7.43 – 7.28 (m, 10H), 7.15 – 7.05 (m, 6H), 6.53 (s, 1H), 5.99 (d,  $J$  = 8.4 Hz, 1H), 4.52 (m, 1H), 3.59 (s, 3H), 3.04 (dd,  $J$  = 14.6, 5.2 Hz, 1H), 2.97 (dd,  $J$  = 14.4, 4.8 Hz, 1H), 1.41 (s, 9H). <sup>13</sup>C NMR (101 MHz, CDCl<sub>3</sub>)  $\delta$  155.67, 142.33, 138.76, 136.48, 129.84, 128.17, 128.15, 119.69, 79.61, 75.40, 53.83, 52.11, 30.34, 28.44. HRMS:  $m/z$  calculated for [M+H]<sup>+</sup>: 512.2549; Found: 512.2533.

Freshly prepared 2-bromoethyl trifluoromethanesulfonate (44 mmol) was added to a stirred solution of protected histidine **2** (40 mmol) in dry DCM (160 mL) <sup>1</sup>under a nitrogen atmosphere in an ice bath. The reaction mixture was gradually warmed to room temperature and stirred for 12 hours. The completion of the reaction was monitored by TLC. After completion, the mixture was concentrated under reduced pressure to give compound **3** without purification and the solid obtained after concentration was further dissolved in 40 mL of MeOH at 40 °C for another 6 hours. The mixture was evaporated and purified by flash column chromatography to give product **4** (yield: 54%). <sup>1</sup>H NMR (400 MHz, CDCl<sub>3</sub>)  $\delta$  7.99 (s, 1H), 6.89 (s, 1H), 5.29 (d,  $J$  = 7.6 Hz, 1H), 4.53 (m, 1H), 4.47 – 4.28 (m, 1H), 3.76 (s, 2H), 3.62 (t,  $J$  = 6.5 Hz, 2H), 3.18 (dd,  $J$  = 15.7, 5.7 Hz, 1H), 3.11 (dd,  $J$  = 15.6, 5.9 Hz, 1H), 1.42 (s, 9H). <sup>13</sup>C NMR (101 MHz, CDCl<sub>3</sub>)  $\delta$  171.42, 155.35, 137.82, 127.70, 125.67, 80.64, 53.09, 52.92, 46.64, 30.05, 28.35, 26.78. HRMS:  $m/z$  calculated for [M+H]<sup>+</sup>: 376.0872; Found: 376.0862.

K<sub>2</sub>CO<sub>3</sub> (100 mmol) was added to a mixture of resulting compound **4** (20 mmol) and dry DMF (80 mL) under a nitrogen atmosphere. The mixture was stirred at 60 °C for 12 hours. The completion of the reaction was monitored by TLC. Then, the reaction mixture was cooled to room temperature, dissolved in EtOAc, and filtered through a Celite pad. The mixture was then extracted with EtOAc and dried over MgSO<sub>4</sub>. The filtrate was evaporated and purified by flash column chromatography to give product **5** (47% yield). <sup>1</sup>H NMR (400 MHz, CDCl<sub>3</sub>)  $\delta$  7.57 (s, 1H), 6.72 – 6.61 (m, 2H), 5.66 (d,  $J$  = 7.9 Hz, 1H), 5.21 (d,  $J$  = 15.6 Hz, 1H), 4.84 (d,  $J$  = 8.8 Hz, 1H), 4.33 (m, 1H), 3.54 (s, 3H), 2.99 (dd,  $J$  = 15.5, 5.7 Hz, 1H), 2.92 (dd,  $J$  = 15.4, 6.3 Hz, 1H), 1.24 (s, 9H). <sup>13</sup>C NMR (101 MHz, CDCl<sub>3</sub>)  $\delta$  171.28, 154.89, 134.53, 128.40, 127.78, 125.70, 104.63, 79.53, 52.82, 52.10, 27.94, 26.29. HRMS:  $m/z$  calculated for [M+H]<sup>+</sup>: 296.1610; Found: 296.1601.

NaOH solution (2 N, 5 mL) was added to a stirred solution of protected N $\delta$ -vinylhistidine **5** (9 mmol) in dioxane (5 mL), and the mixture was stirred at room temperature for 2 hours. The completion of the reaction was monitored by TLC. The pH of the reaction mixture was adjusted to 7. After that, the mixture was evaporated and dissolved in DCM. Then, the mixture was filtered through a Celite pad. After that, the DCM was evaporated in vacuo to give product **6**.

The resulting compound **6** was dissolved in HCl (6 M, 10 mL), and the reaction was allowed to stir for 6 h at room temperature. The volatiles were subsequently evaporated, and the residue was redissolved in MeOH (5 mL) and precipitated into Et<sub>2</sub>O (250 mL), giving product **7** as a white solid in 69% yield. <sup>1</sup>H NMR (400 MHz, MeOD) δ 9.35 (s, 1H), 7.68 (s, 1H), 7.28 (dd, *J* = 15.2, 8.4 Hz, 1H), 6.00 (dd, *J* = 15.2, 2.1 Hz, 1H), 5.69 (dd, *J* = 8.4, 2.2 Hz, 1H), 4.38 (t, *J* = 7.1 Hz, 1H), 3.62 – 3.45 (m, 2H). <sup>13</sup>C NMR (101 MHz, MeOD) δ 168.61, 134.40, 128.12, 126.85, 119.58, 115.05, 50.95, 23.96. HRMS: *m/z* calculated for [M+H]<sup>+</sup>: 182.0925; Found: 182.0923.

## 2. Chemical synthesis of resorufin acetyl methoxymethyl ether (A-Me-Res)

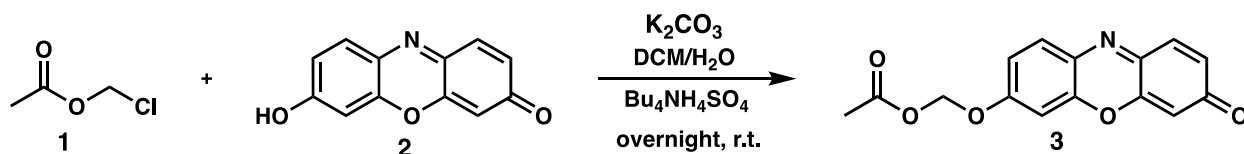

Following the literature procedure<sup>2</sup>, resorufin **2** (50 mg, 0.235 mmol) and anhydrous potassium carbonate (K<sub>2</sub>CO<sub>3</sub>) were dissolved in H<sub>2</sub>O (2.4 mL) to obtain a dark red solution. *N,N,N*-Tributyl-1-butanaminium sulfate 50 wt. % in H<sub>2</sub>O (150 mg, 0.286 mmol) was added, followed by chloromethyl acetate **1** (94 μL, 1.304 mmol) in DCM. The reaction mixture was stirred at room temperature overnight. The reaction mixture was then diluted with H<sub>2</sub>O and DCM. The aqueous layer was extracted with DCM, and the combined organics were washed with H<sub>2</sub>O and saturated brine three times. The organic layer was dried over anhydrous Na<sub>2</sub>SO<sub>4</sub> and concentrated under reduced pressure to give a purple oil. Purification via column chromatography afforded the compound resorufin acetyl methoxymethyl ether as a red–orange solid in 37% yield. <sup>1</sup>H NMR (600 MHz, CDCl<sub>3</sub>) δ 7.74 (d, *J* = 8.8 Hz, 1H), 7.42 (d, *J* = 9.7 Hz, 1H), 7.04 (dd, *J* = 8.9, 2.7 Hz, 1H), 6.99 (d, *J* = 2.7 Hz, 1H), 6.84 (dd, *J* = 9.7, 1.9 Hz, 1H), 6.33 (d, *J* = 1.9 Hz, 1H), 5.84 (s, 2H), 2.16 (s, 2H). HRMS: *m/z* calculated for [M+H]<sup>+</sup>: 286.0715; Found: 286.0707.

## 3. Chemical synthesis of ethyl 2-(dimethyl(phenyl)silyl) acetate by whole-cell catalysis

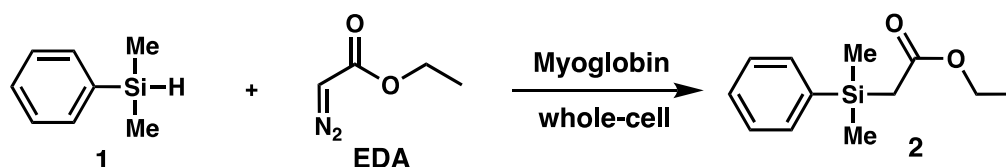

*E. coli* BL21(DE3) cells expressing wild-type myoglobin (H64V, V68A) were prepared according to the protocol described above. After harvesting, the cells were suspended in PBS buffer and diluted to an OD<sub>600</sub> of 40. The cell suspension was transferred to an open Erlenmeyer flask equipped with a stir bar and supplemented with 50 mM D-glucose solution (from a 2 M stock solution). Reactions were initiated by the dropwise addition of compound **1** (from a 2 M stock solution in ethanol, final concentration: 20 mM), followed by the dropwise addition of EDA (from a 2 M stock solution in ethanol, final concentration: 20 mM). The reaction mixtures were stirred at room temperature for 20 hours and extracted twice with ethyl acetate. The combined organic layers were dried over sodium sulfate and evaporated under reduced pressure. The crude product was purified by flash column chromatography to give product **2** in 22% yield. <sup>1</sup>H NMR (600 MHz, CDCl<sub>3</sub>) δ 7.56 – 7.51 (m, 2H), 7.42 – 7.34 (m, 3H), 4.04 (q, *J* = 7.2 Hz, 2H), 2.11 (s, 2H), 1.16 (t, *J* = 7.1 Hz, 2H), 0.41 (s, 6H).



## Supplementary Figures (1-58)

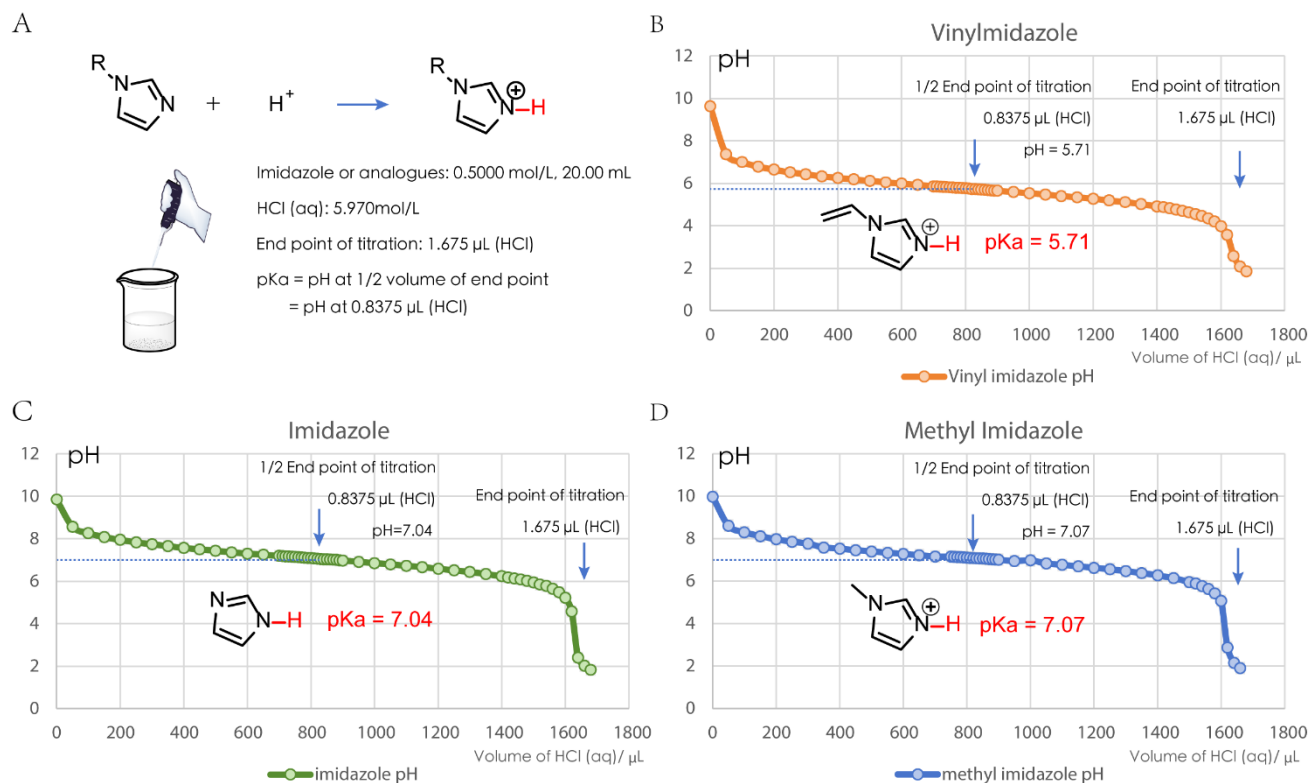

**Supplementary Figure 1: Measurement of pKa of imidazole analogs.** (A) Principle of weak-base pKa determination. (B) Titration curve of vinyl imidazole. (C) Titration curve of imidazole. (D) Titration curve of methyl imidazole. The data is the representative data from similar results after three independent experiments.

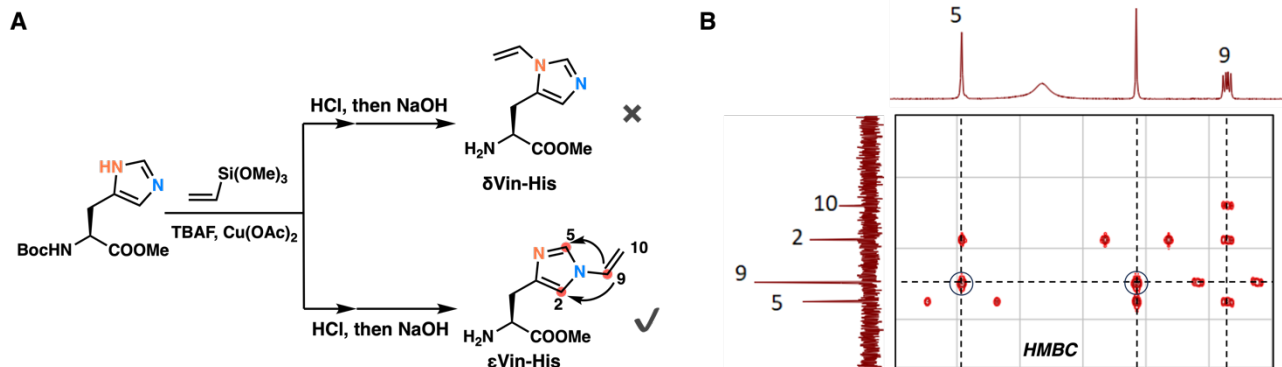

**Supplementary Figure 2: Direct synthesis of N $\delta$ -vinyl histidine by a metal-catalyzed C–N bond formation reaction.** (A) Synthetic routes for direct vinylation of histidine. (B) HMBC NMR verification of the structure obtained by direct histidine vinylation.

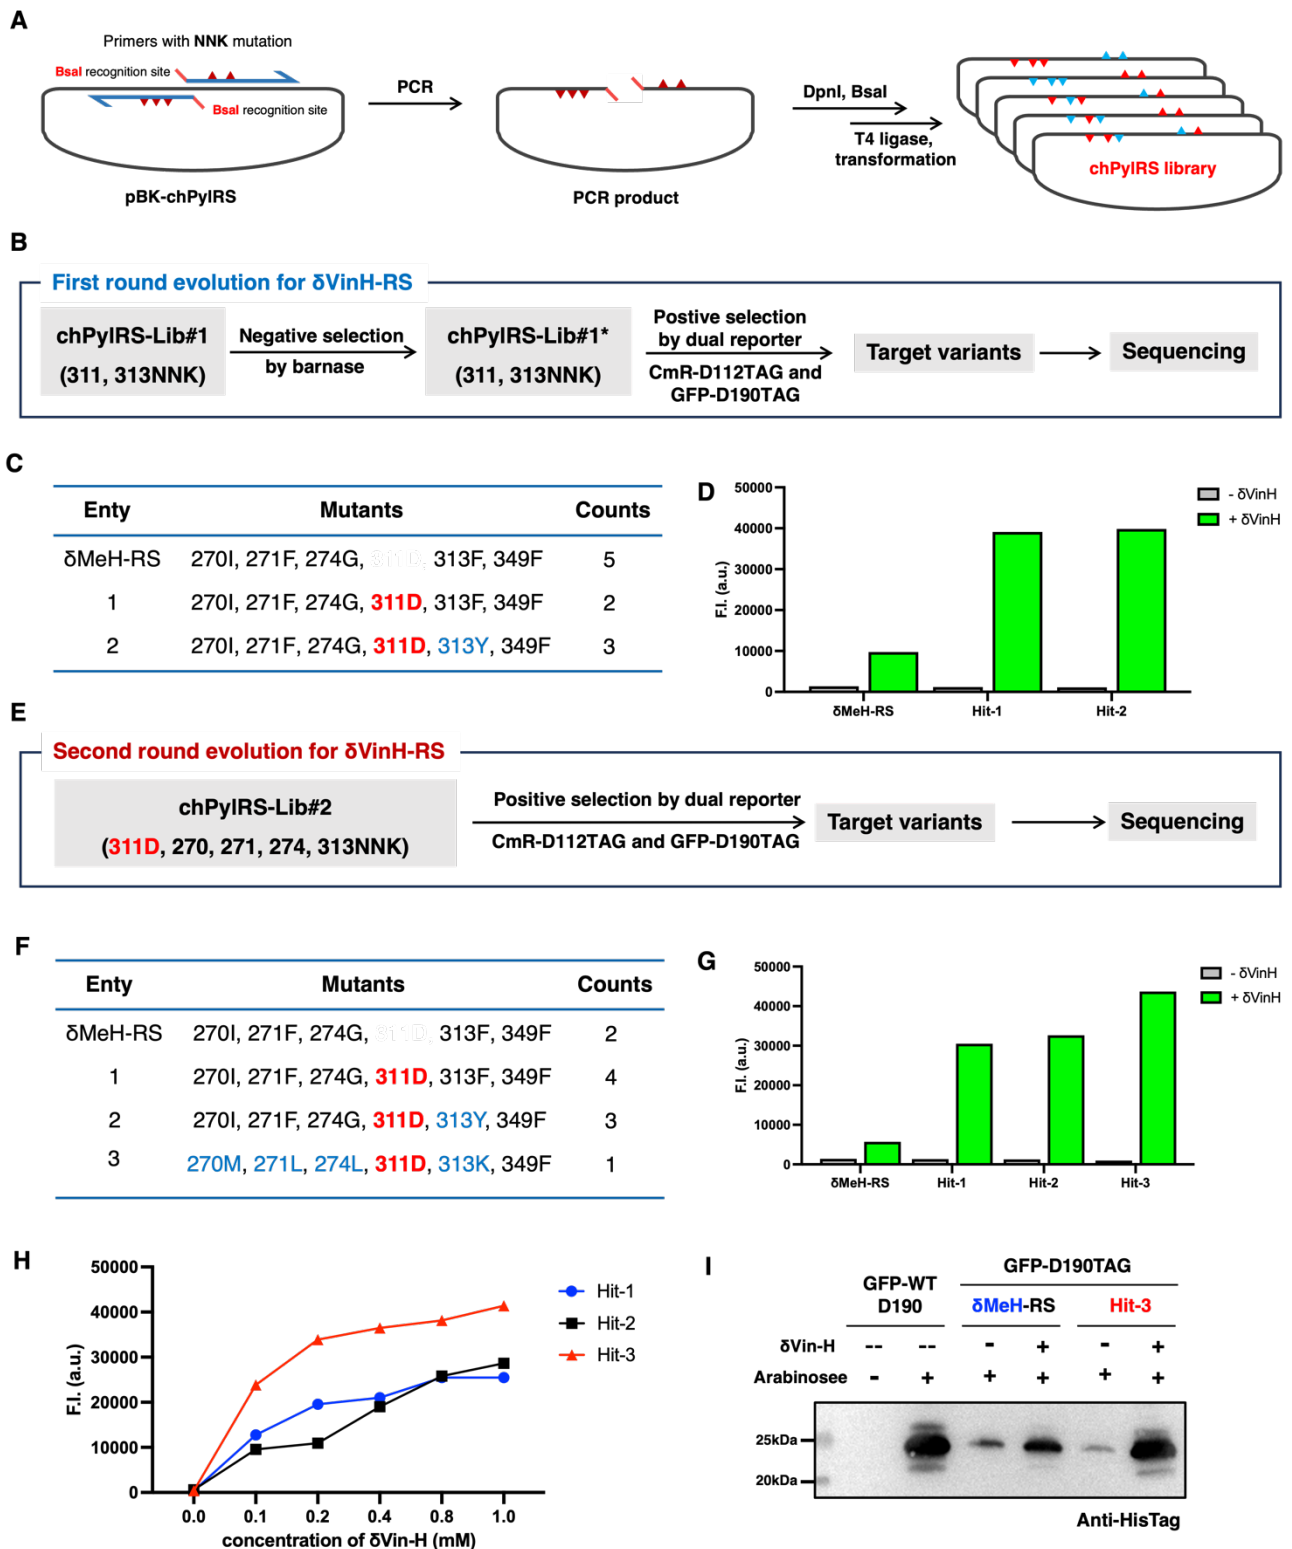

**Supplementary Figure 3: The workflow of the direct evolution of  $\delta$ VinH-RS.** (A) Construction workflow of the PyIRS gene library. (B) First-round evolution of  $\delta$ VinH-RS by negative and positive selection. (C) PyIRS sequence results of positive clones in the first round of evolution. (D) Selection results of the positive clones in the presence of  $\delta$ Vin-H by the GFP reporter in the first round of evolution. (E) Second round of evolution for  $\delta$ VinH-RS by positive selection. (F) PyIRS sequence results of positive clones in the second round of evolution. (G) Selection results of the positive clones in the presence of  $\delta$ Vin-H by the GFP reporter in the second round of evolution. (H-I) Validation of the different  $\delta$ VinH-RS variants through amber codon suppression of GFP-N190TAG in DH10B *E. coli*. The data in Figure D, G, H and I is the representative data from similar results after three independent experiments.

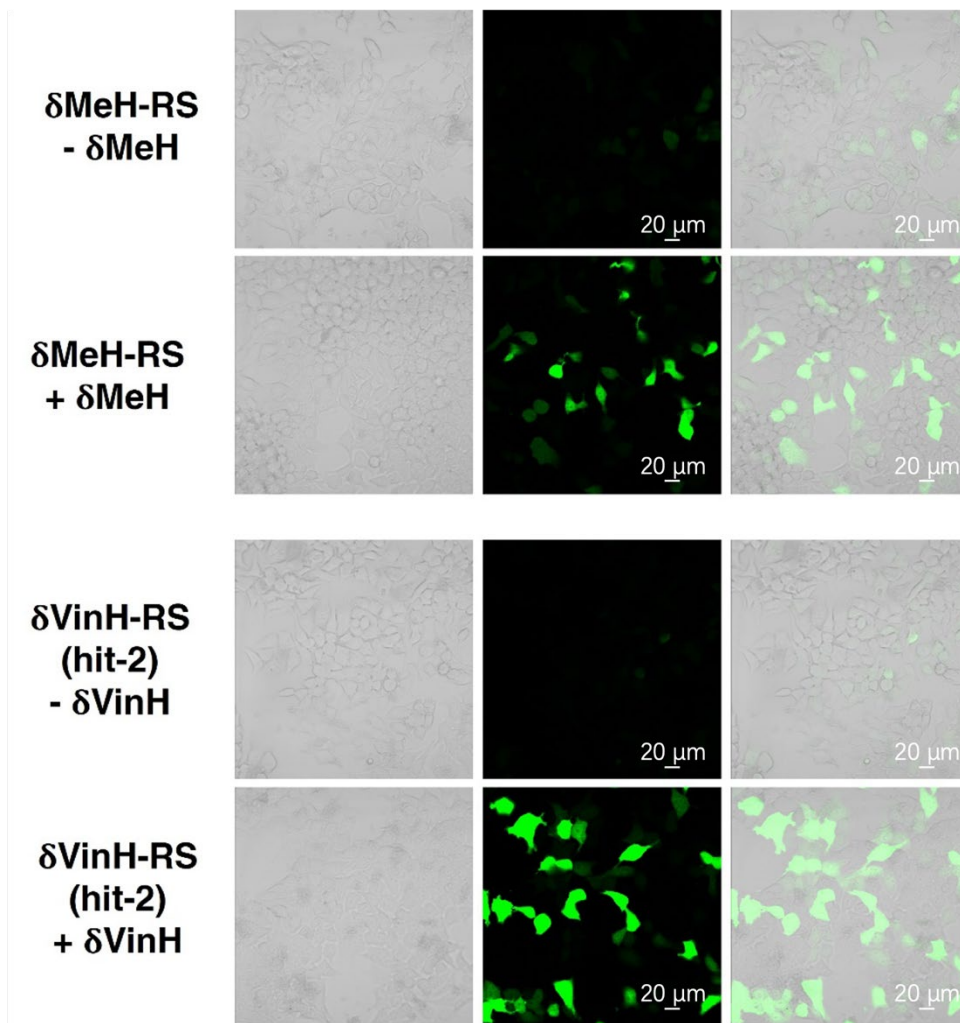

**Supplementary Figure 4: Fluorescence images of the incorporation of  $\delta$ Vin-H into GFP-Y40TAG in HEK 293T cells.** The data is the representative data from similar results after three independent experiments.

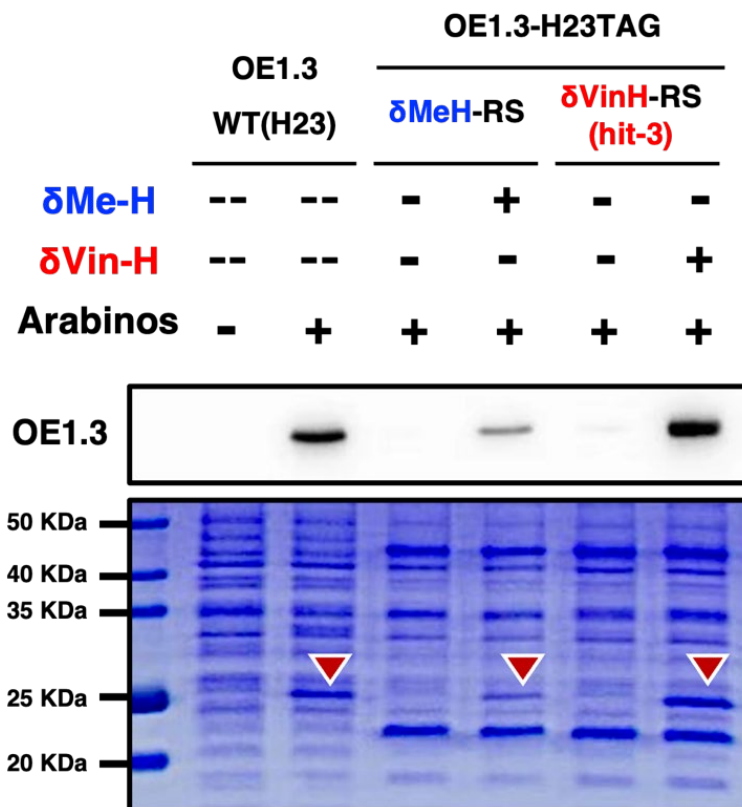

**Supplementary Figure 5: SDS-PAGE analysis of the incorporation efficiency of  $\delta$ Vin-H into OE1.3-H23TAG.**  
 The data is the representative data from similar results after three independent experiments.

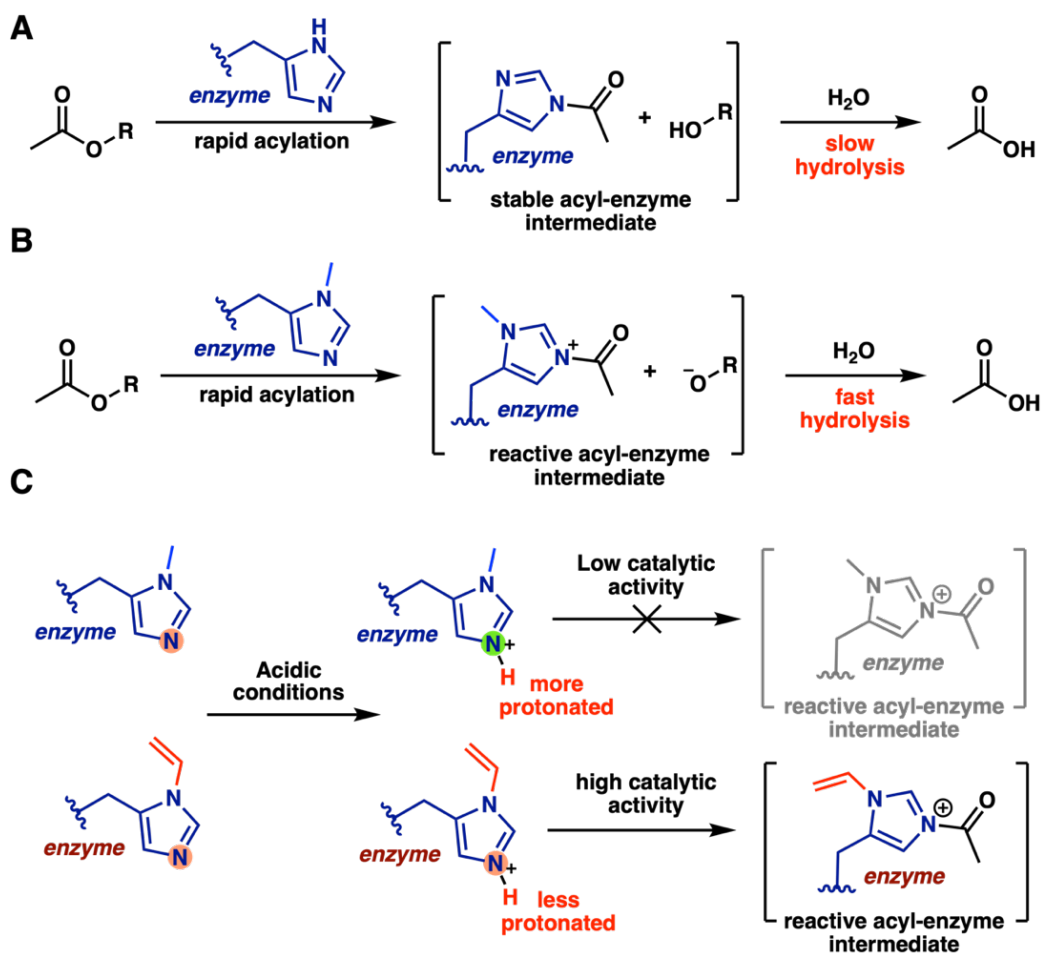

**Supplementary Figure 6: Proposed mechanism of the ester hydrolysis reaction in the catalytic center of the histidine analogs.** (A) Histidine ester hydrolysis catalyzed by histidine under neutral conditions. (B) Ester hydrolysis catalyzed by N $\delta$ -methyl histidine under neutral conditions. (C) Ester hydrolysis catalyzed by N $\delta$ -vinyl histidine under acidic conditions.

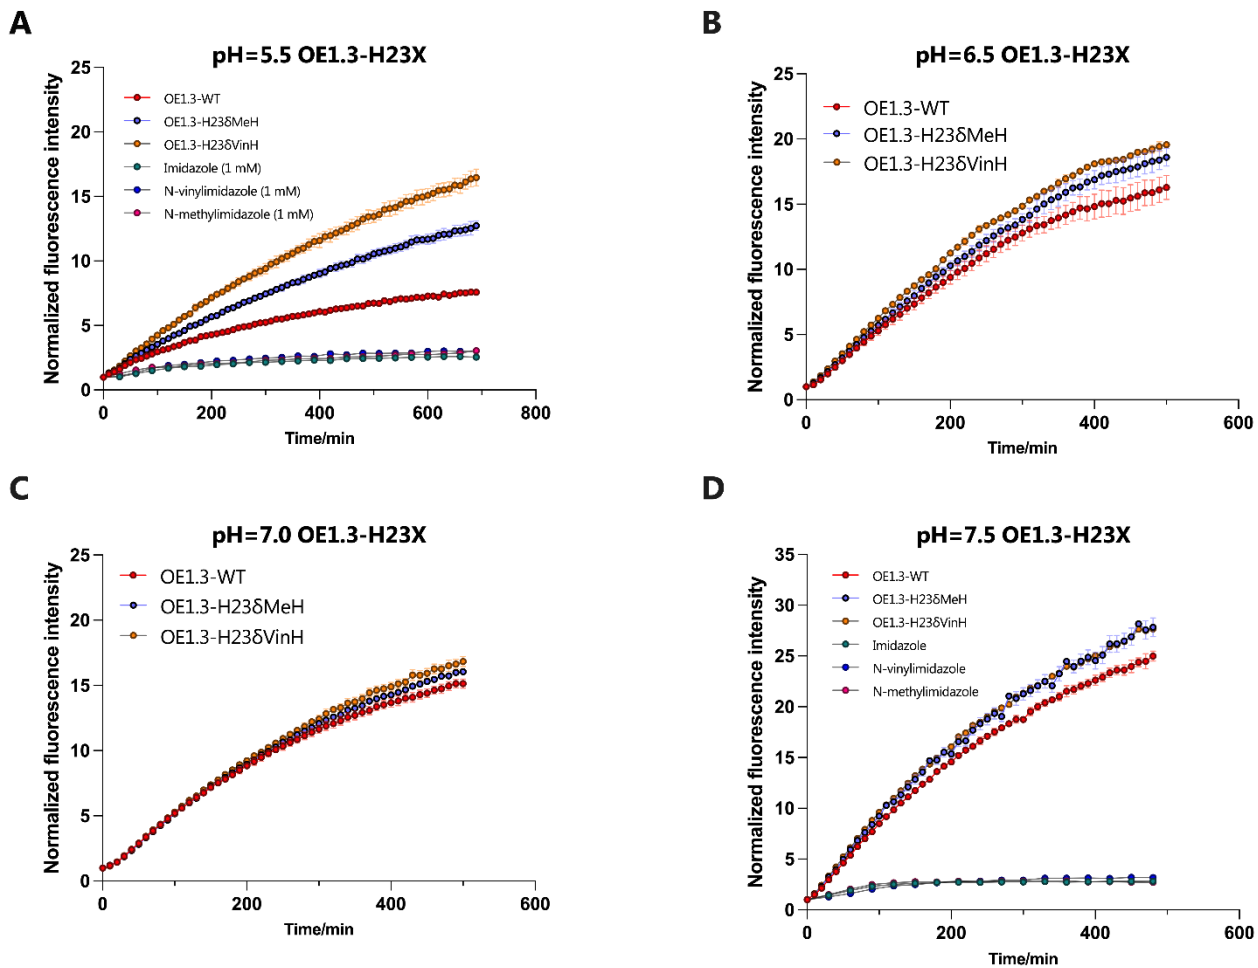

**Supplementary Figure 7: Comparison of the hydrolysis activity of resorufin acetyl methoxymethyl ether (A-Me-Res) catalyzed by OE1.3-His,  $\delta$ MeH and  $\delta$ VinH at different pH values. (A) pH=5.5. (B) pH=6.5. (C) pH=7.0. (D) pH=7.5. The data in Figure A-D are presented as mean values  $\pm$  SEM (n=3 independent experiments).**

**$\delta$ VinH-RS (hit-3)** **$\delta$ VinH-RS (hit-2)**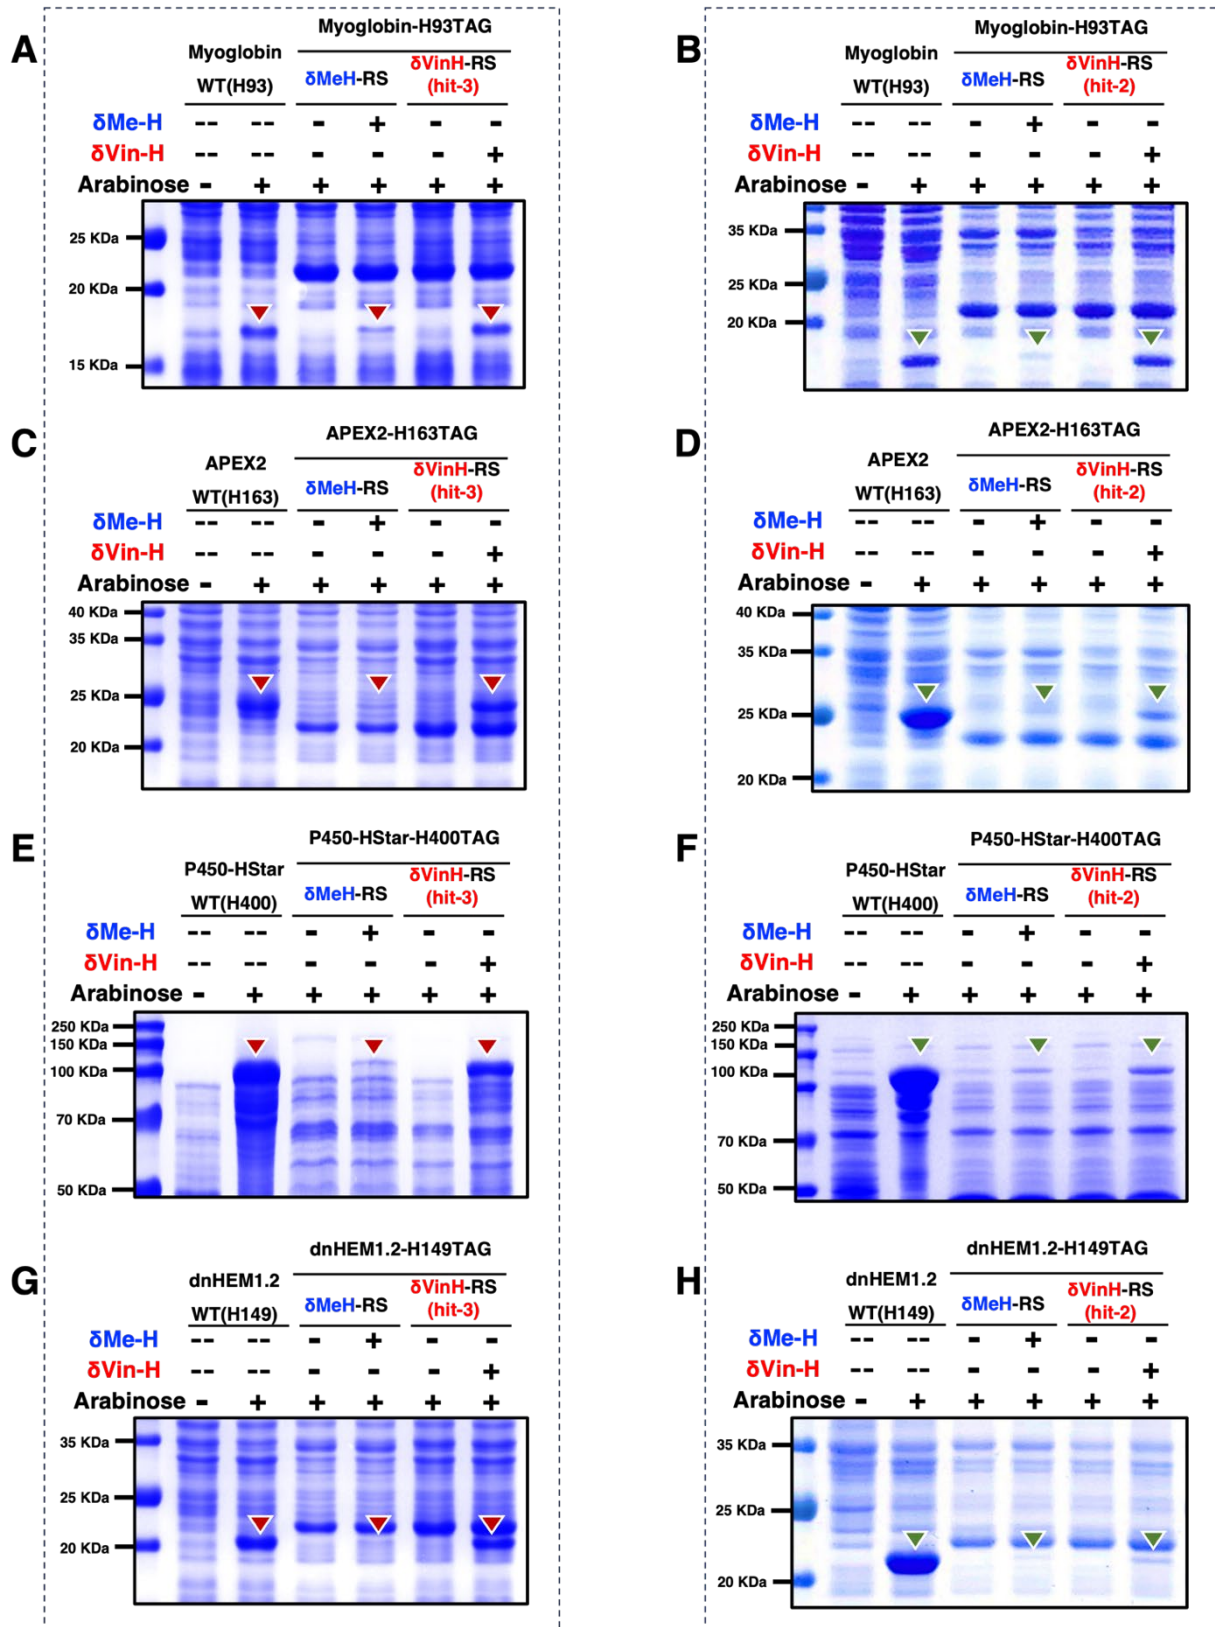

**Supplementary Figure 8: SDS-PAGE analysis of the incorporation efficiency of  $\delta$ Vin-H into four different heme-dependent proteins by different PyIRS variants. (A-B) Myoglobin-H93TAG. (C-D) APEX2-H163TAG. (E-F) P450-BM3-HStar-H400TAG. (G-H) dnHEM1.2-H149TAG. The data is the representative data from similar results after three independent experiments.**



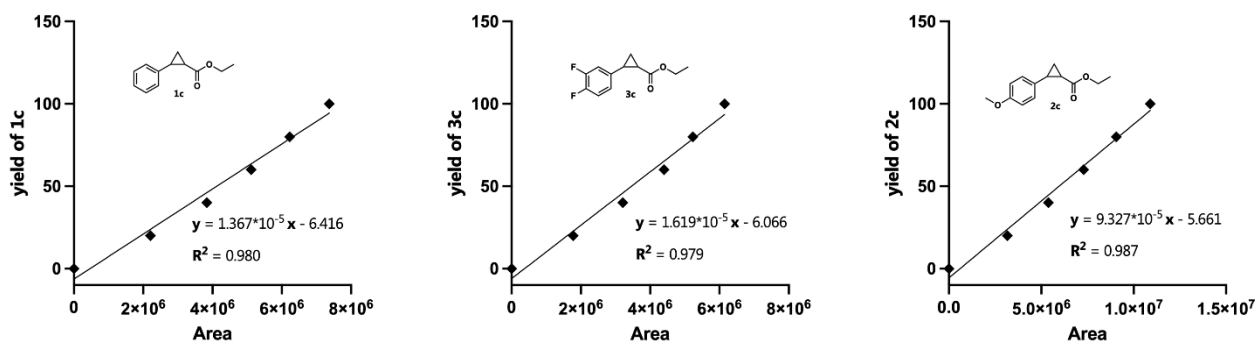

**Supplementary Figure 9:** Standard curve for determination of cyclopropane product concentrations. The data is the representative data from similar results after three independent experiments.

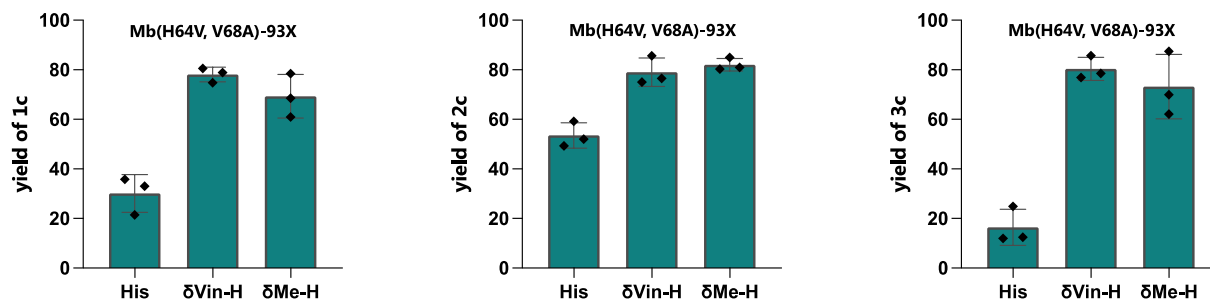

**Supplementary Figure 10:** Mb-catalyzed cyclopropanation in air. Conversions for myoglobin-catalyzed cyclopropanation reactions by using different Mb(H64V, V68A) variants under aerobic conditions. Reaction conditions: 10  $\mu$ M enzyme, 10 mM styrene, 20 mM EDA and 10 mM dithionite. The data are presented as mean values  $\pm$  SD (n=3 independent experiments).

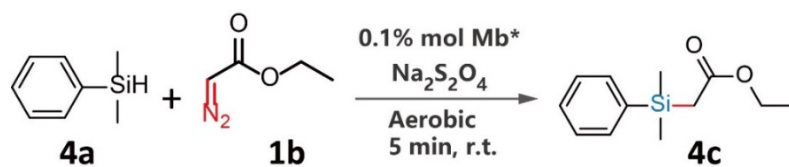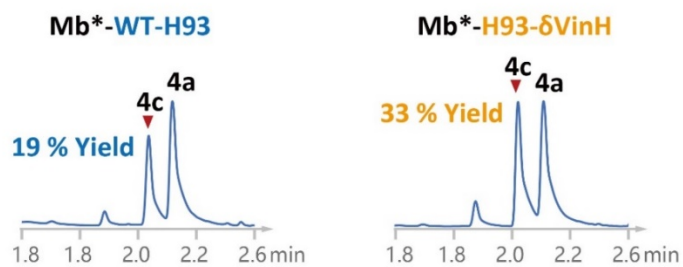

**Supplementary Figure 11:** Mb-catalyzed Si-H insertion reaction. The data is the representative data from similar results after three independent experiments.

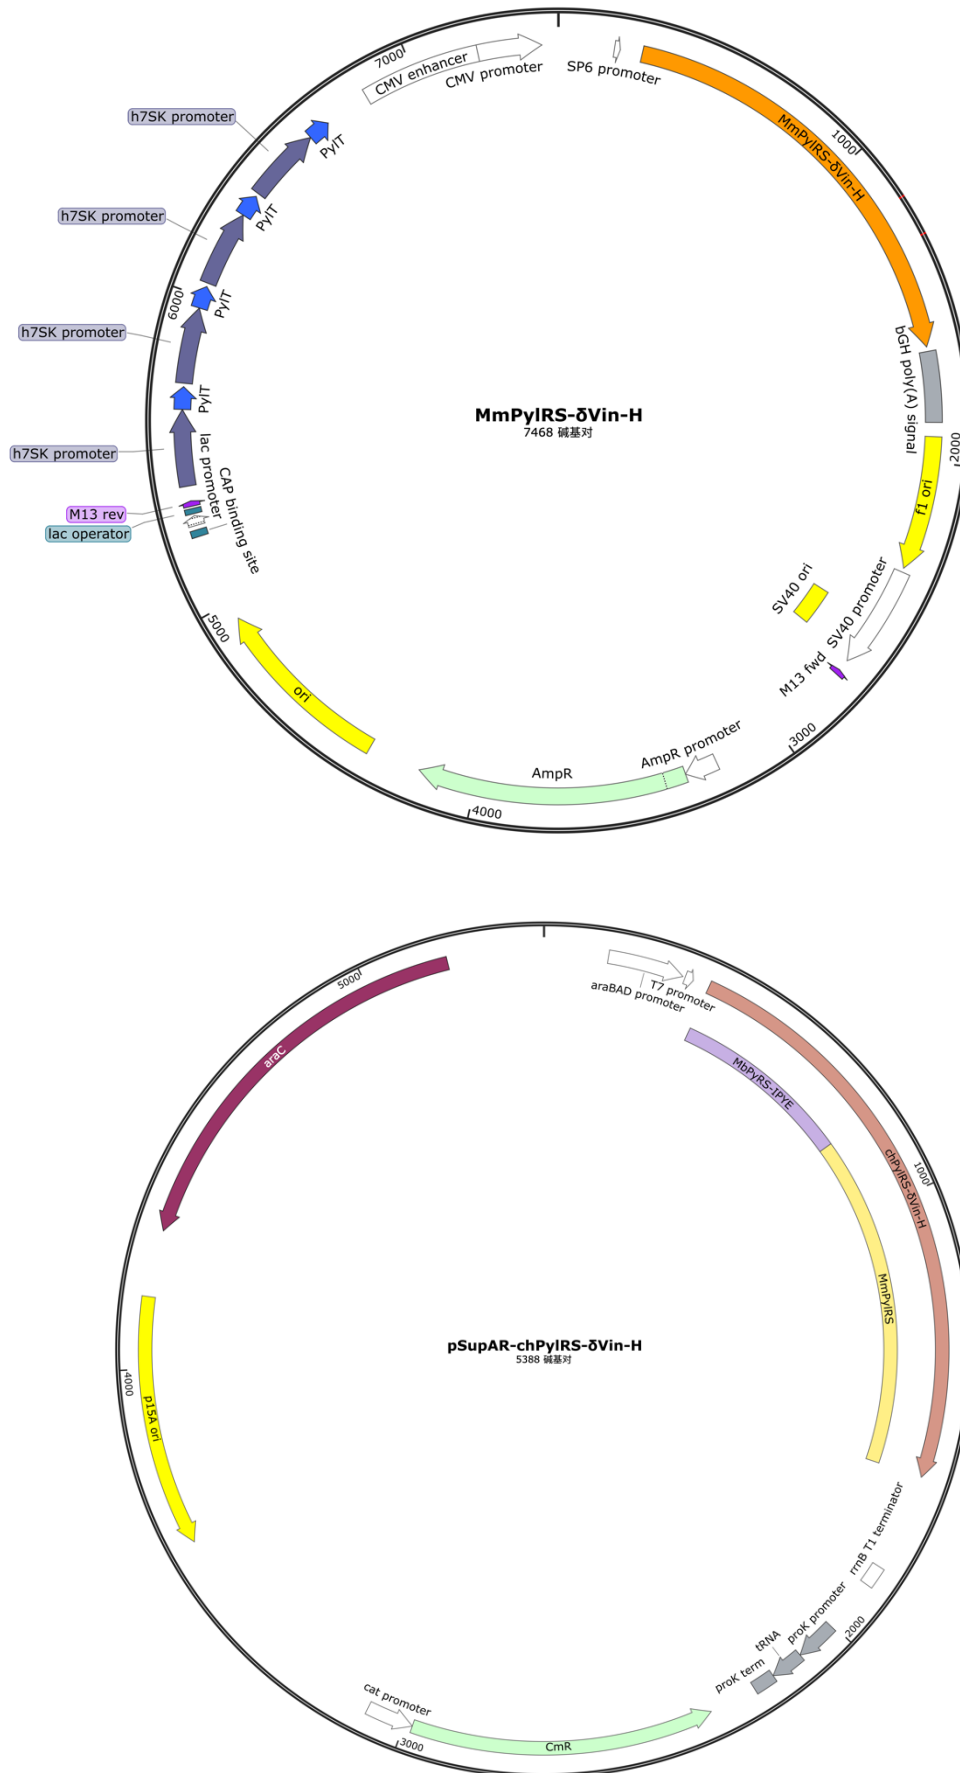

**Supplementary Figure 12:** Plasmid map of PyIRS in the eukaryotic expression vector (top) and prokaryotic expression vector (bottom).

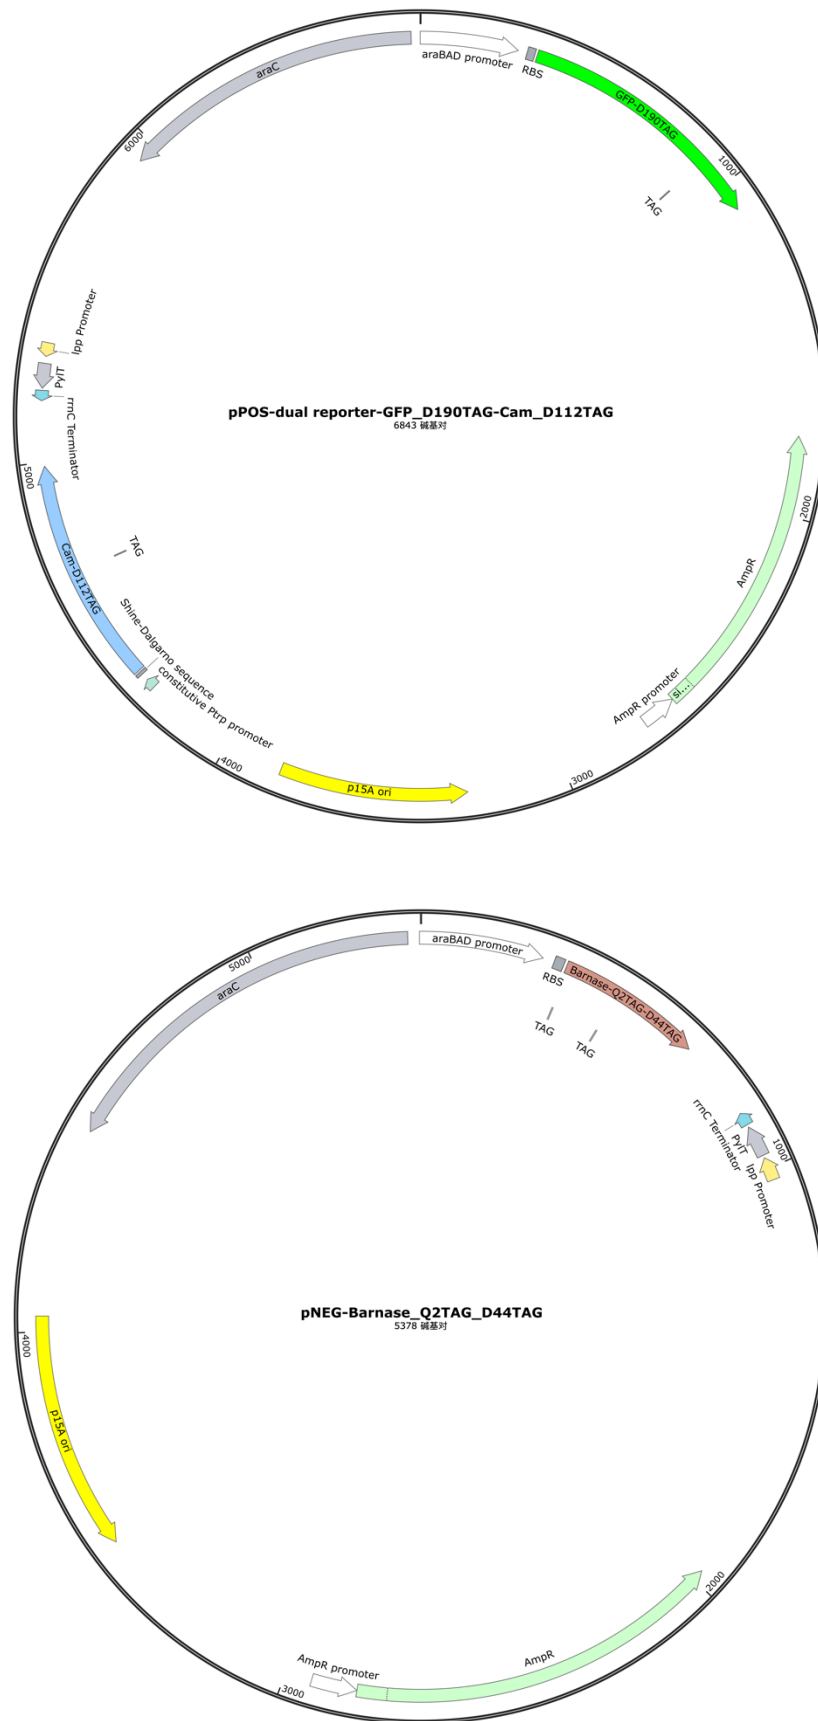

**Supplementary Figure 13:** Plasmid map of the positive selection plasmid (top) and negative selection plasmid (bottom).

HR-01-620\_1.fid  
2021-5-6-180-C

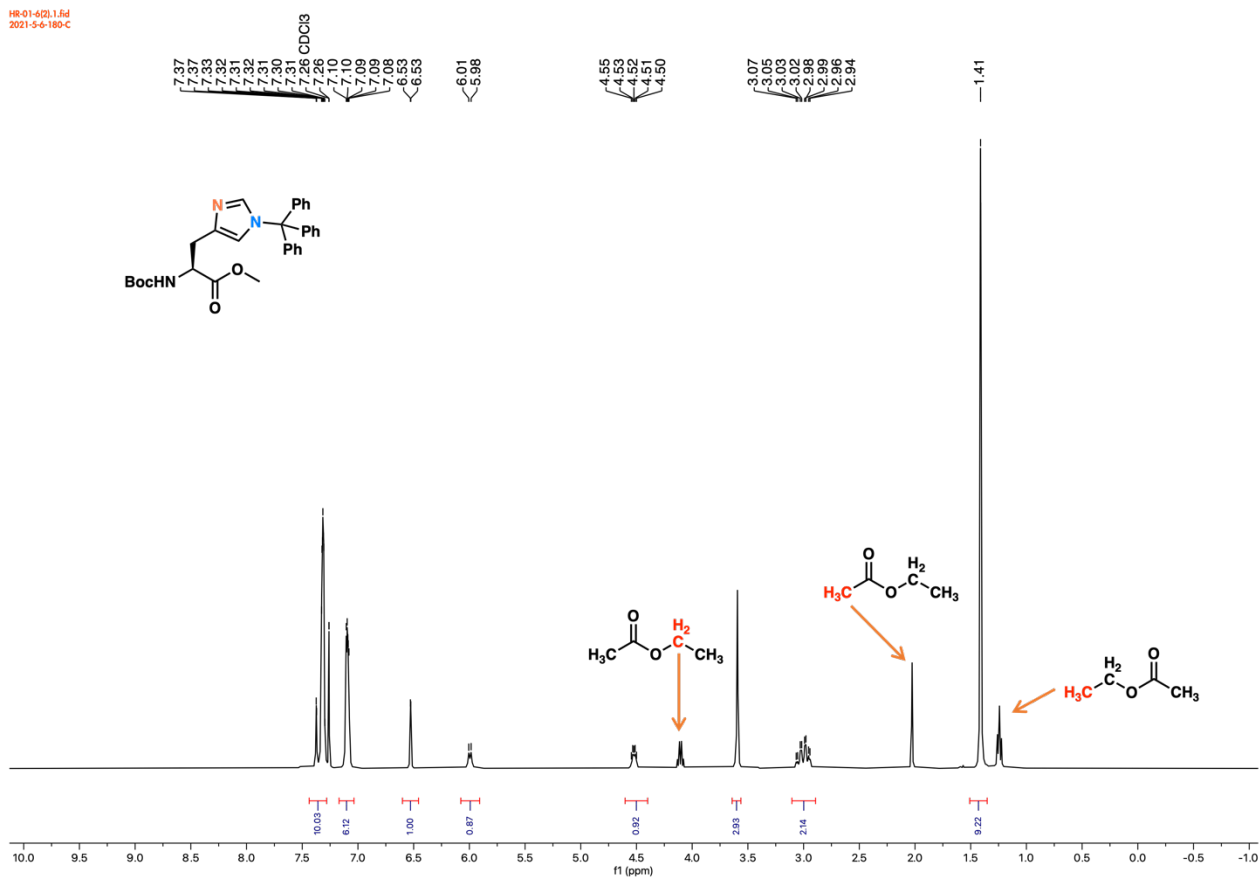

Supplementary Figure 14. <sup>1</sup>H NMR spectrum for compound 2.

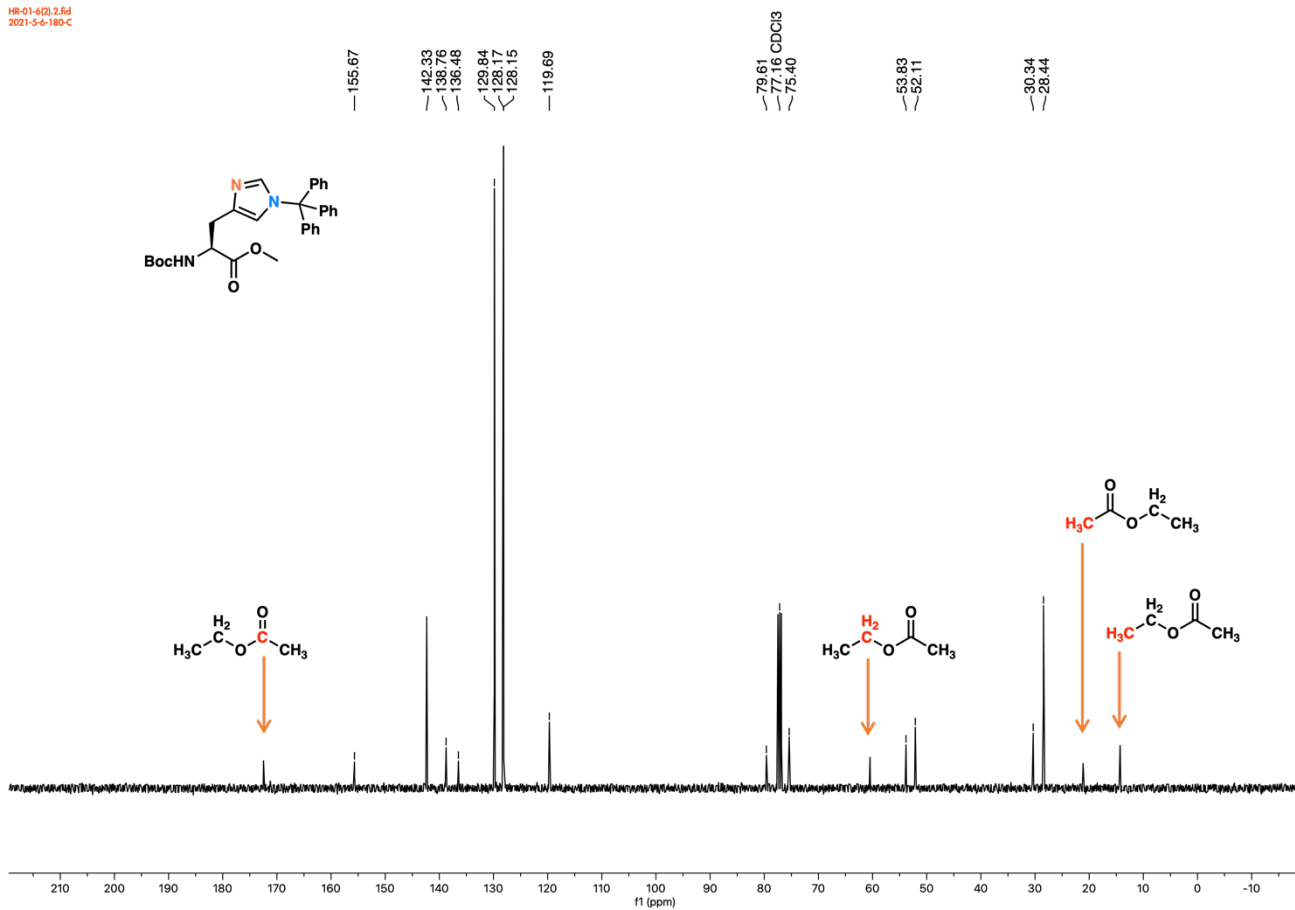

Supplementary Figure 15. <sup>13</sup>C NMR spectrum for compound 2.

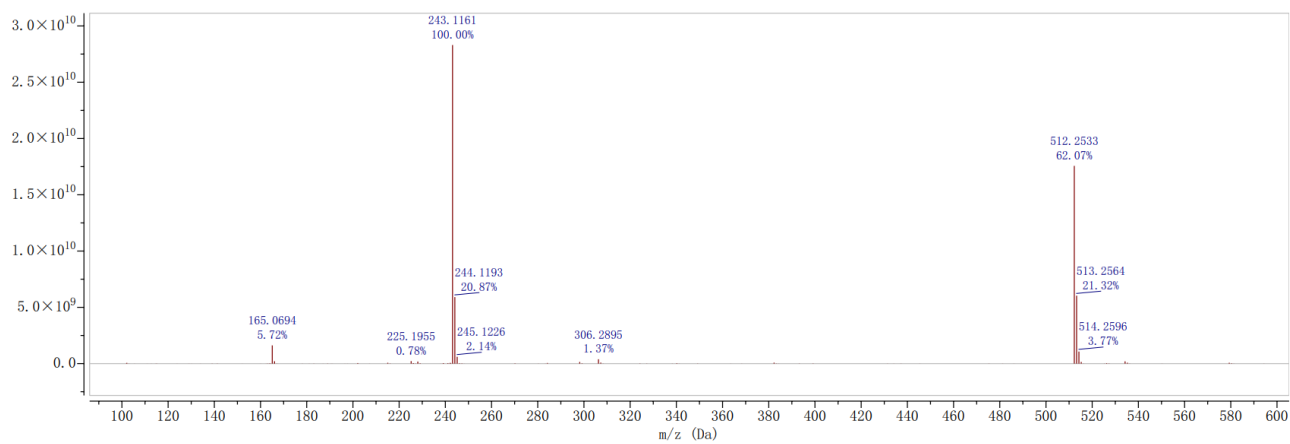

**Supplementary Figure 16.** High-resolution mass spectral of for compound 2.



HR-01-8(2).1.f4

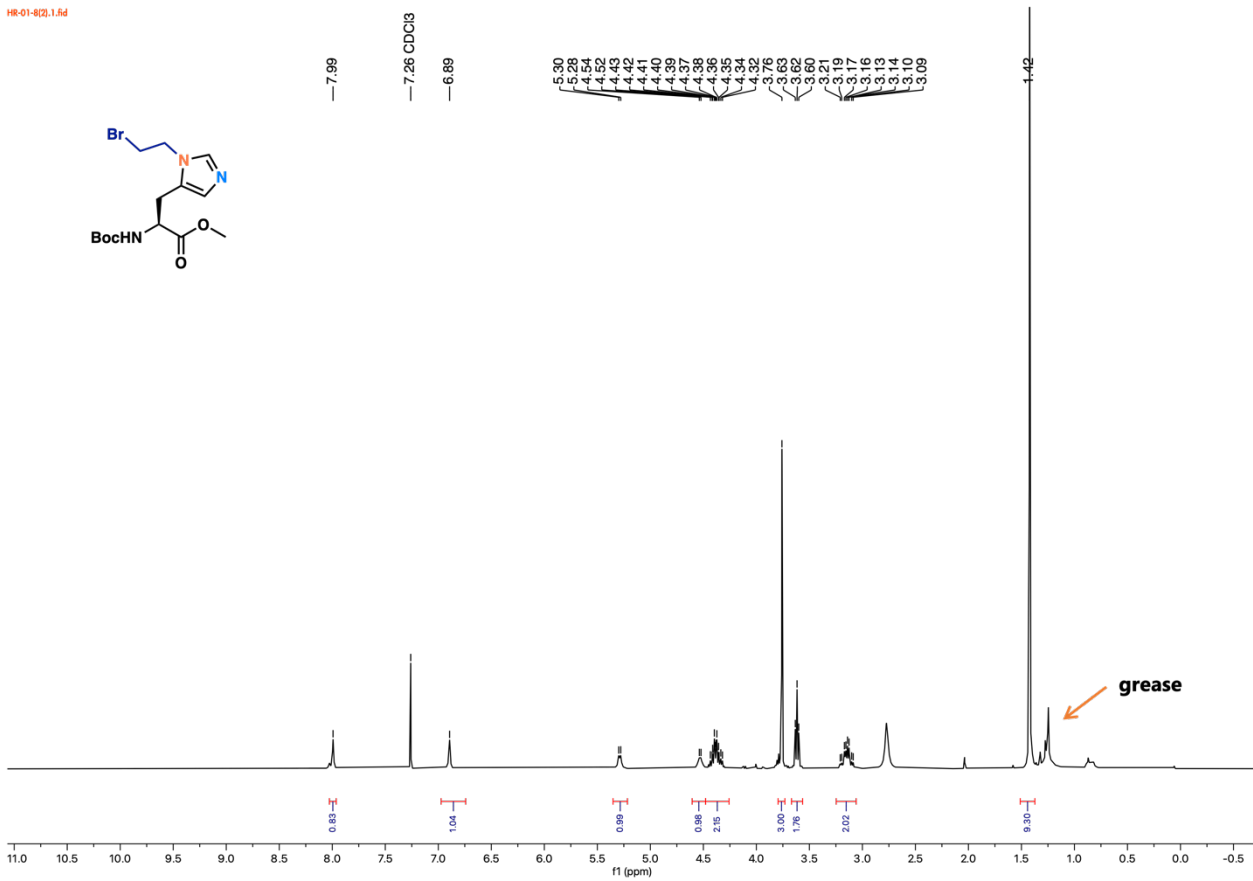

Supplementary Figure 17. <sup>1</sup>H NMR spectrum for compound 4.

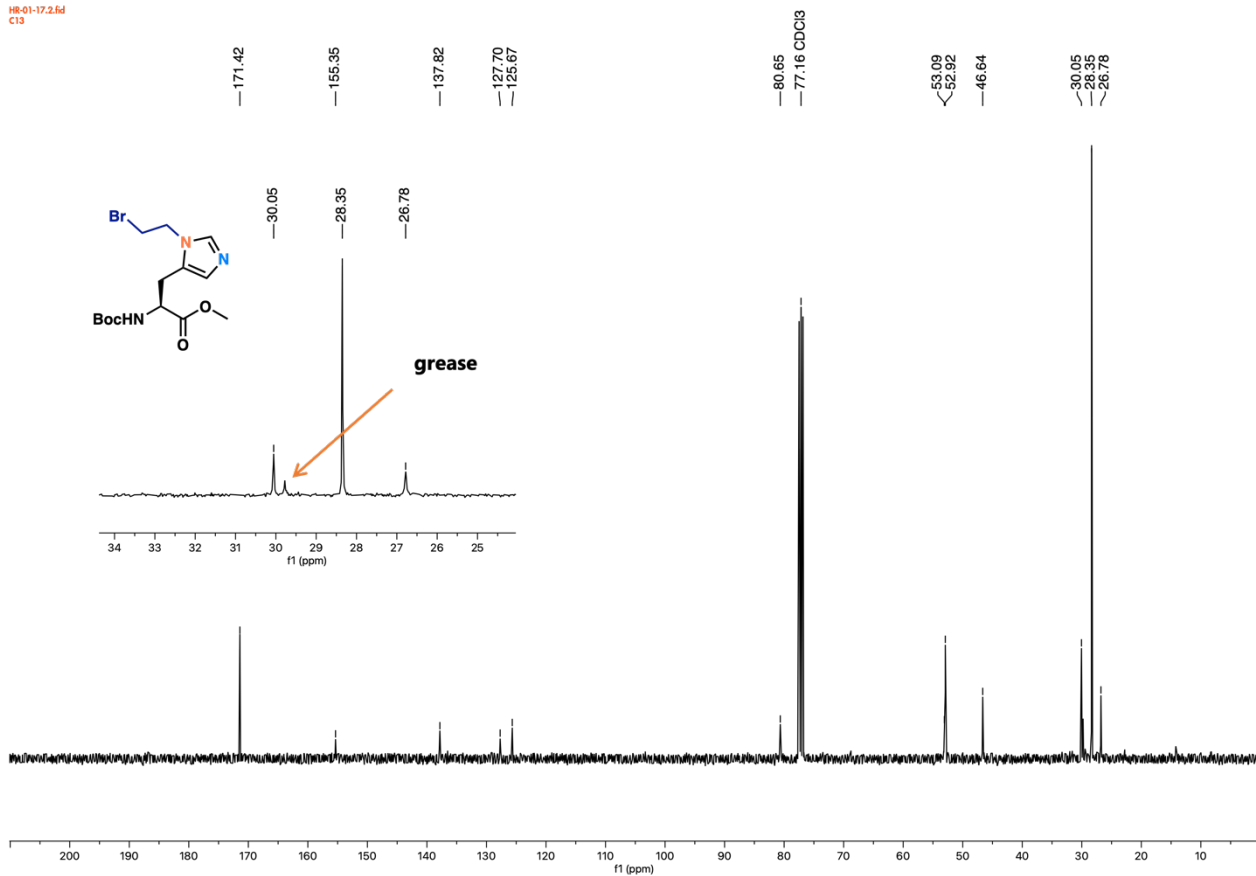

Supplementary Figure 18.  $^{13}\text{C}$  NMR spectrum for compound 4.

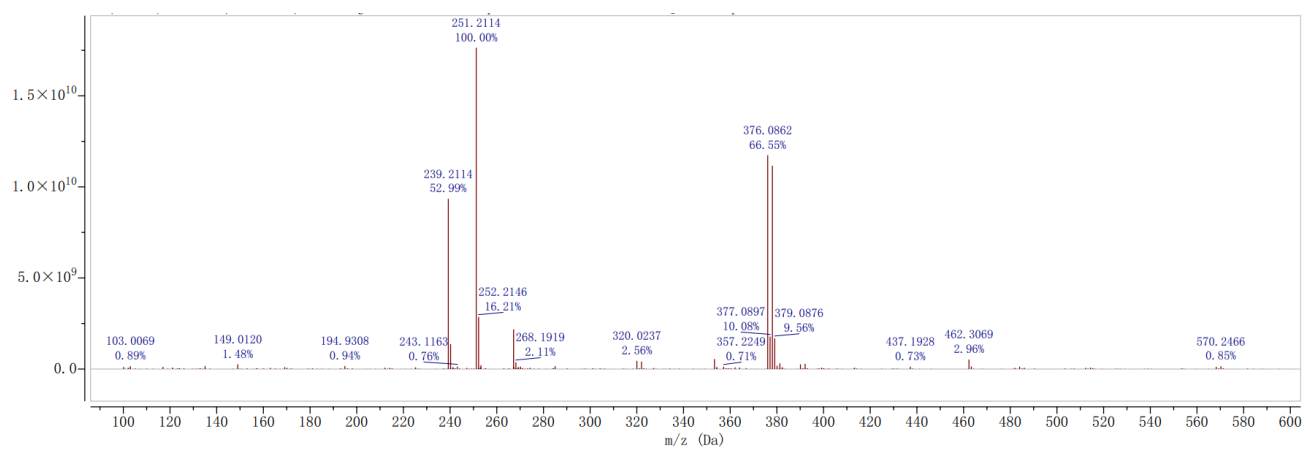

**Supplementary Figure 19.** High-resolution mass spectral of for compound **4**.

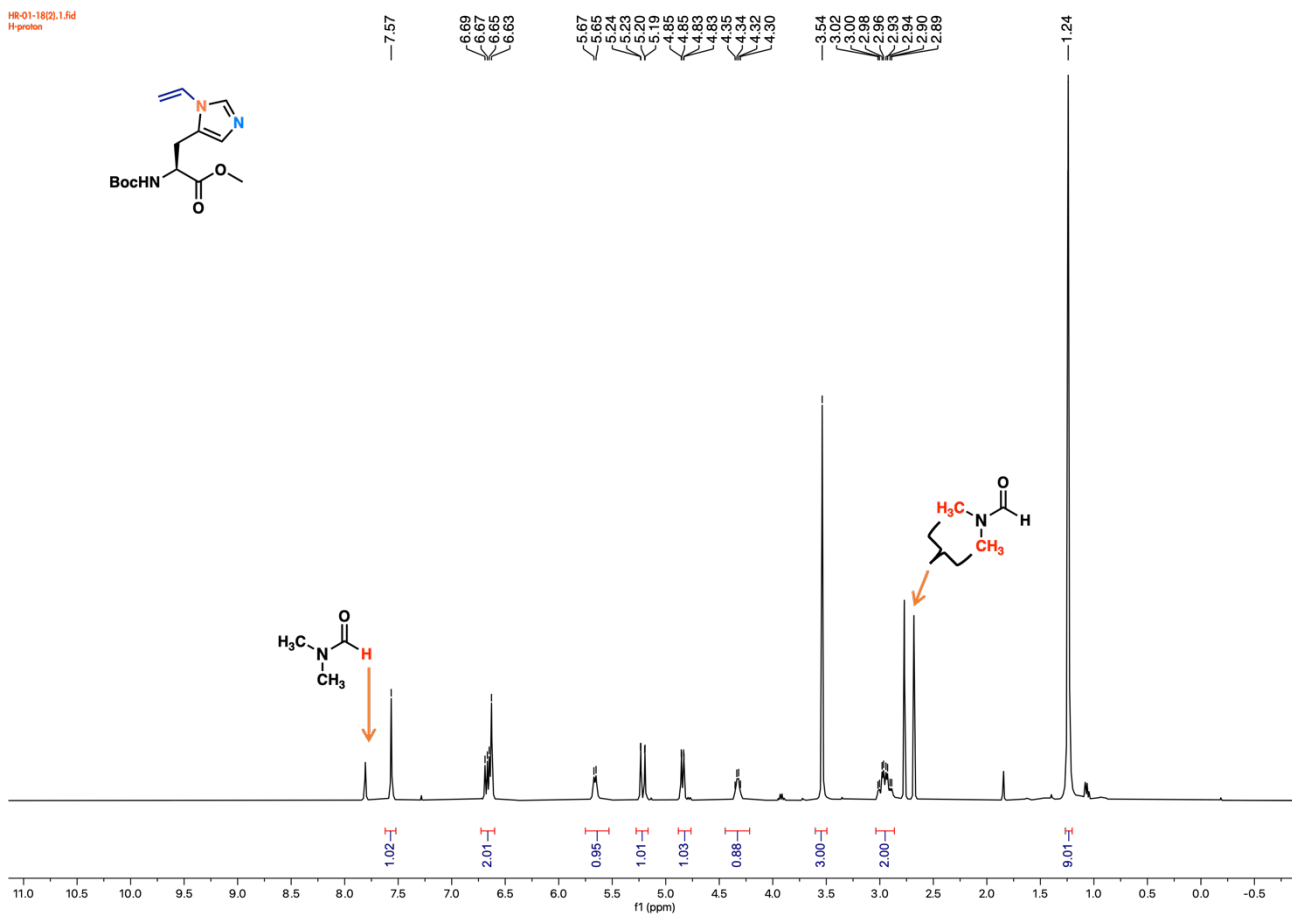

Supplementary Figure 20. <sup>1</sup>H NMR spectrum for compound 5.

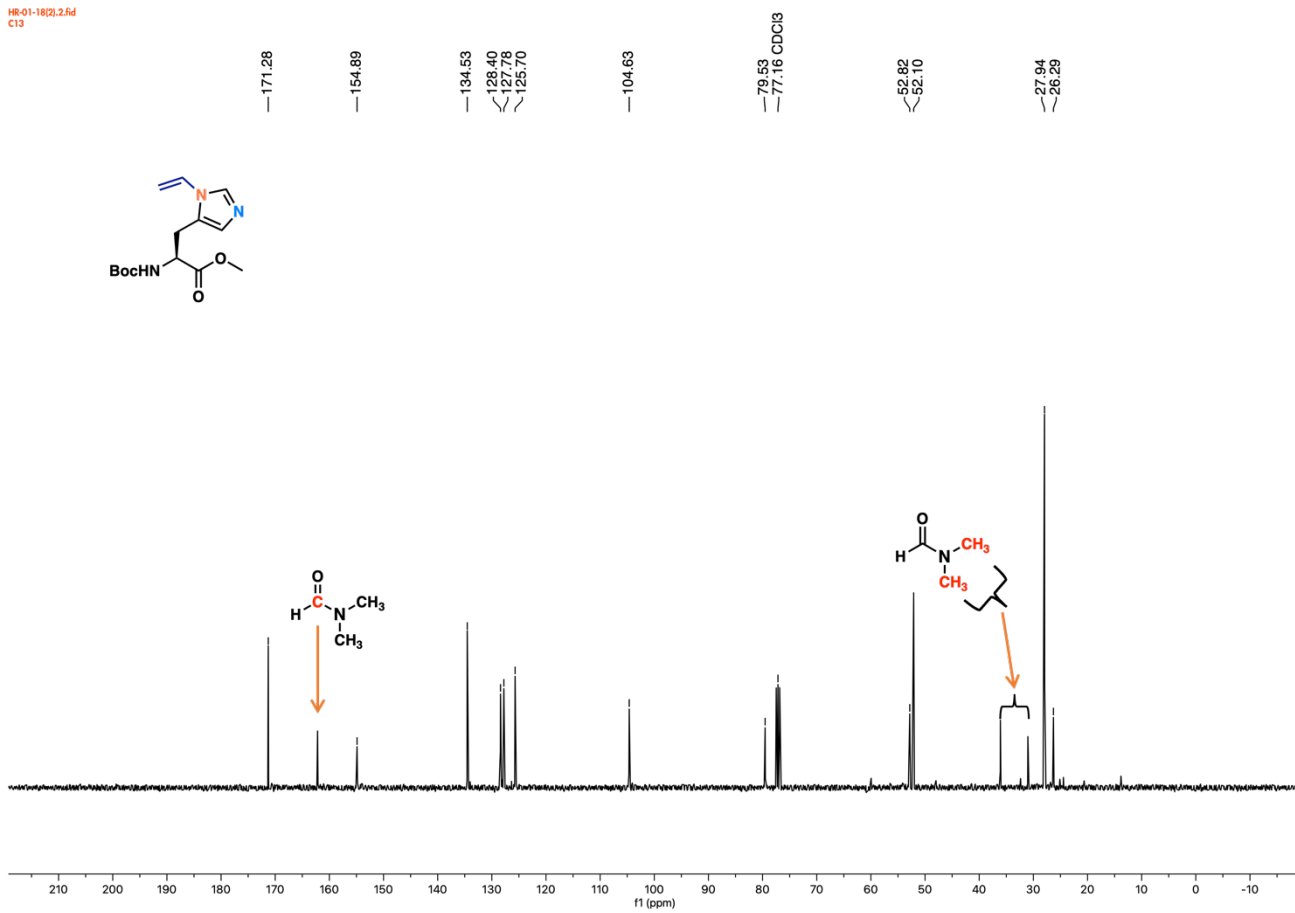

Supplementary Figure 21. <sup>13</sup>C NMR spectrum for compound 5.

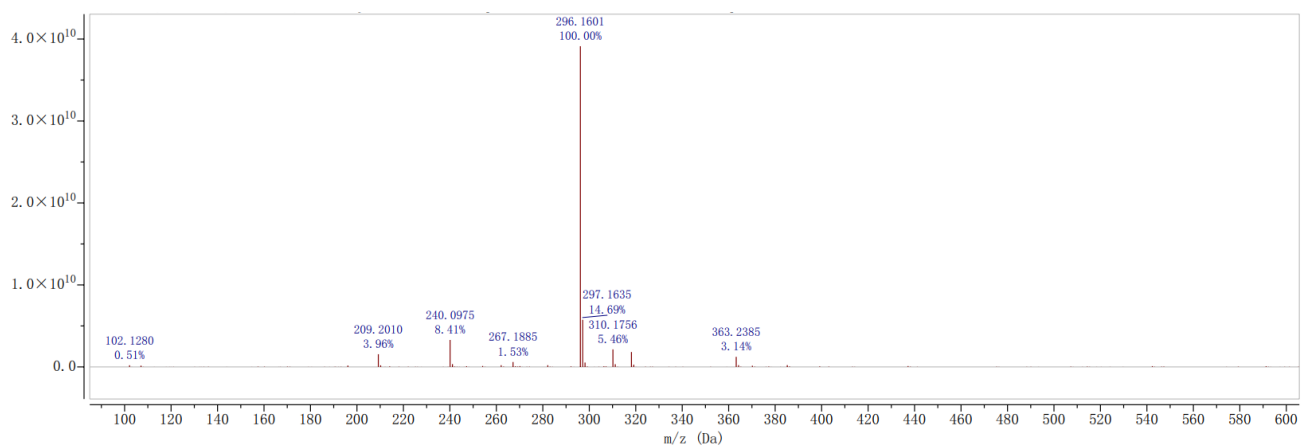

**Supplementary Figure 22.** High-resolution mass spectral of for compound **5**.

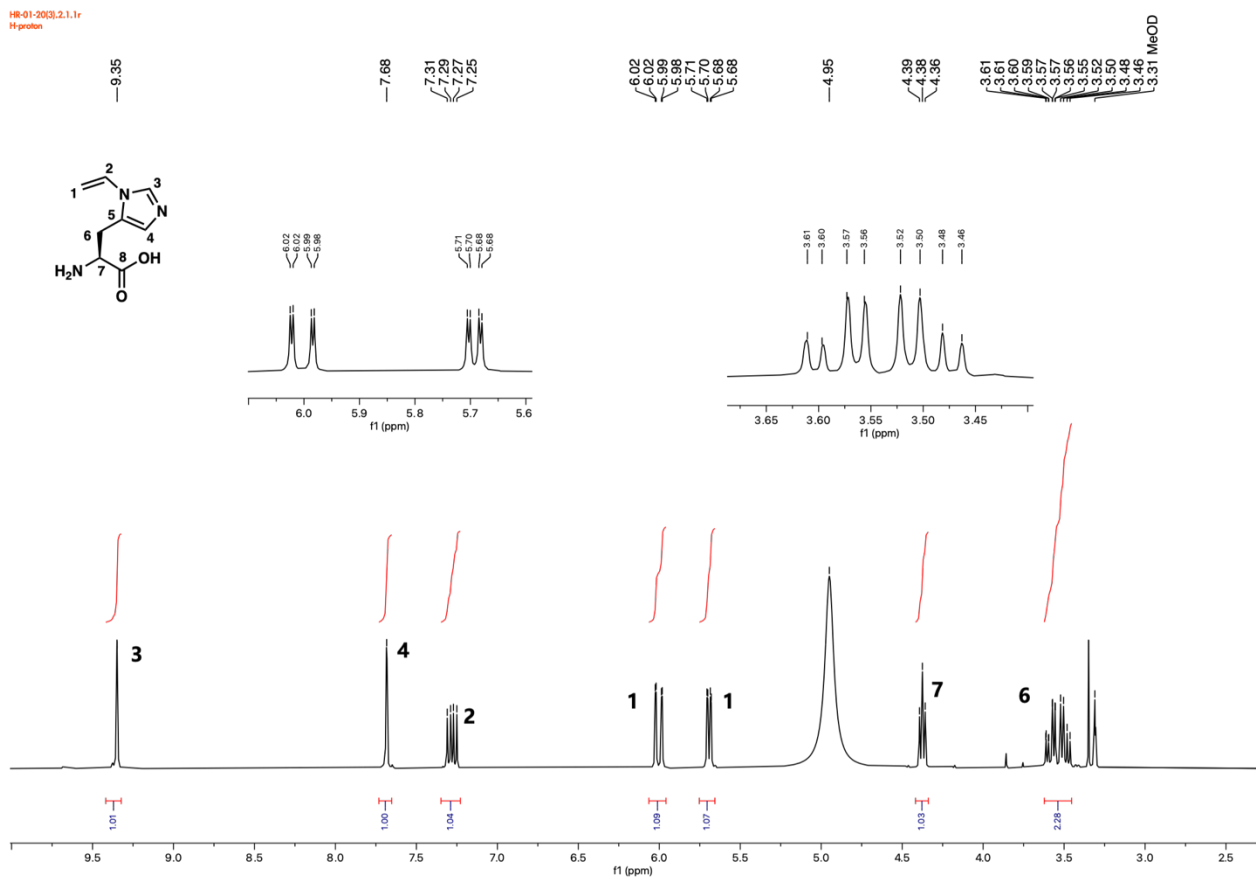

Supplementary Figure 23. <sup>1</sup>H NMR spectrum for compound 7.

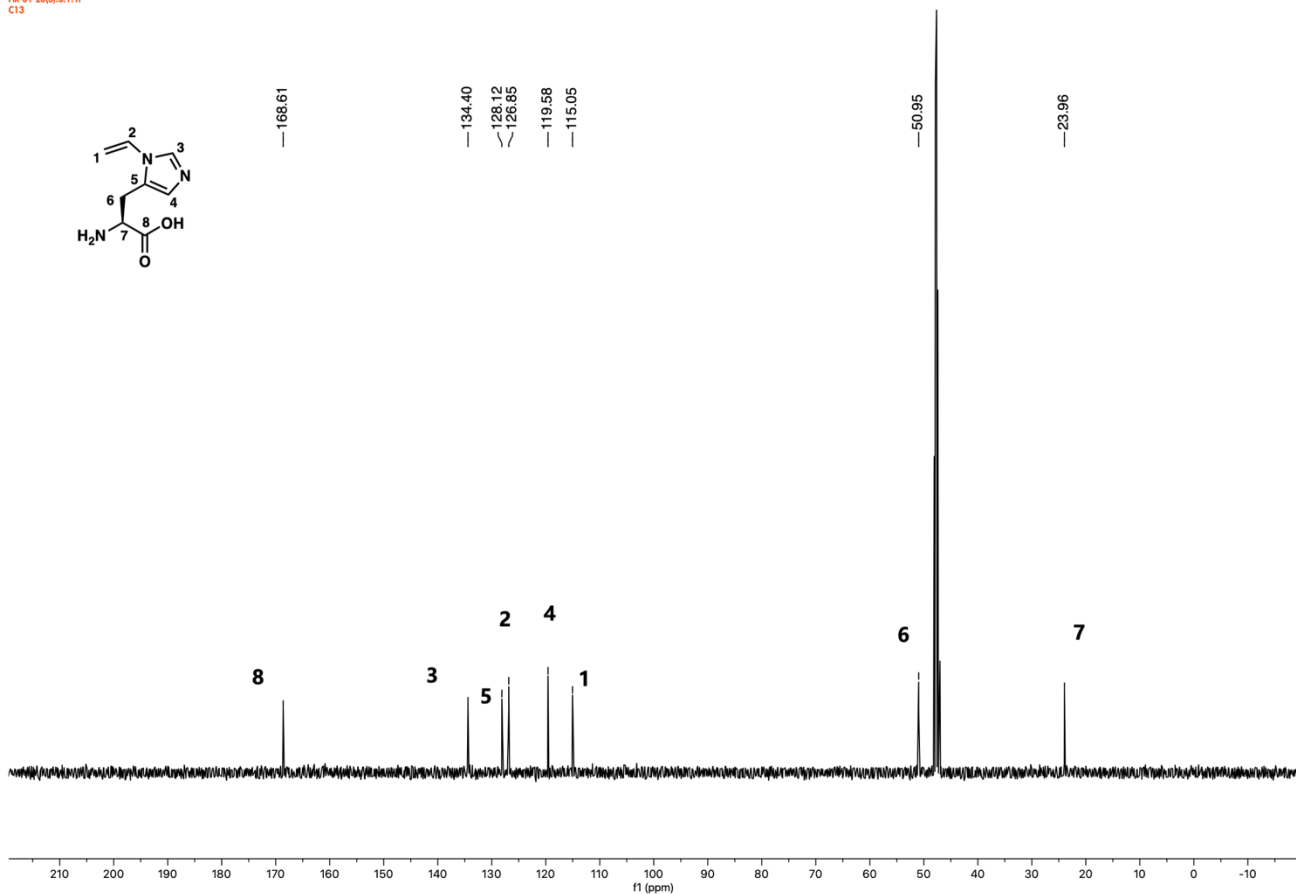

Supplementary Figure 24. <sup>13</sup>C NMR spectrum for compound 7.



HR-01-2023.6.1.1r  
depp-135

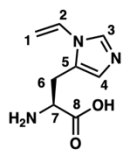

HR-01-2023.3.1.1r  
C13

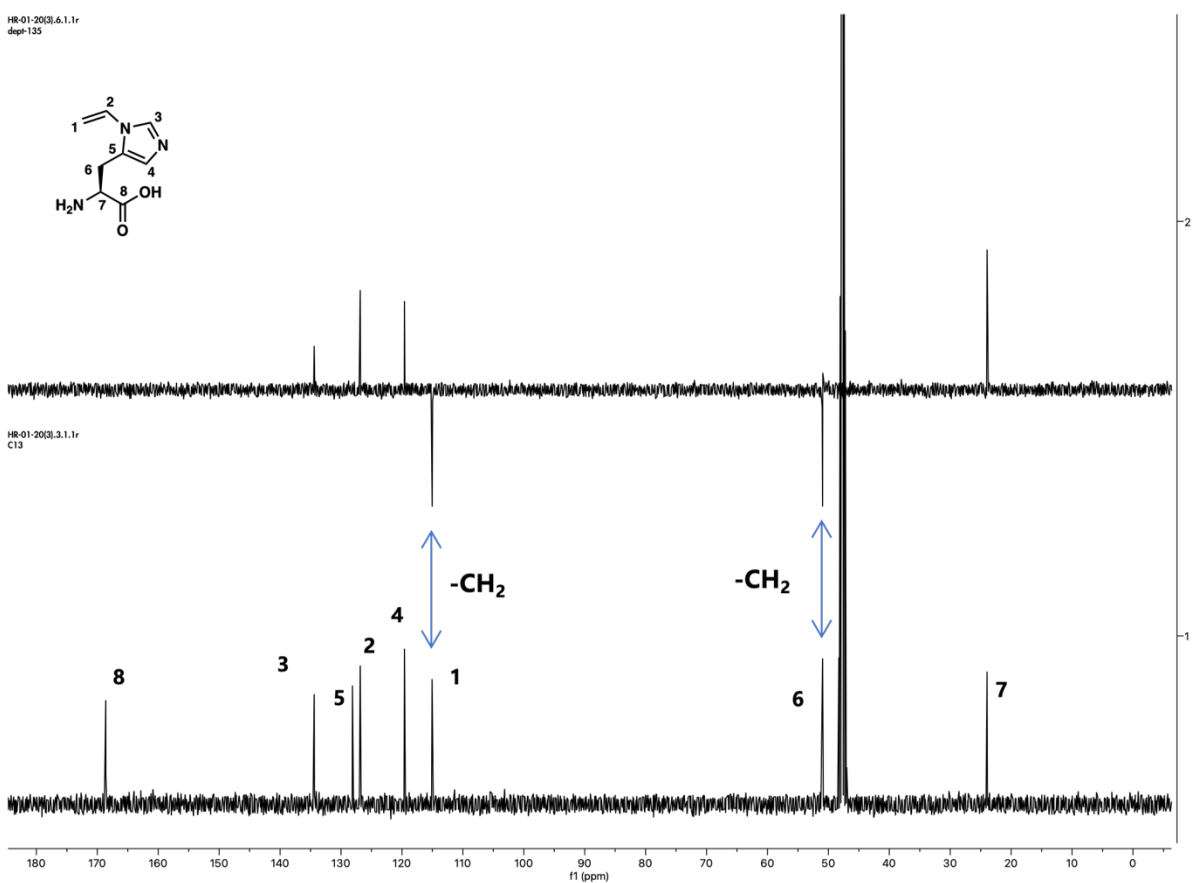

Supplementary Figure 25.  $^{13}\text{C}$  NMR spectrum(top) and DEPT135 NMR spectrum(down) for compound 7

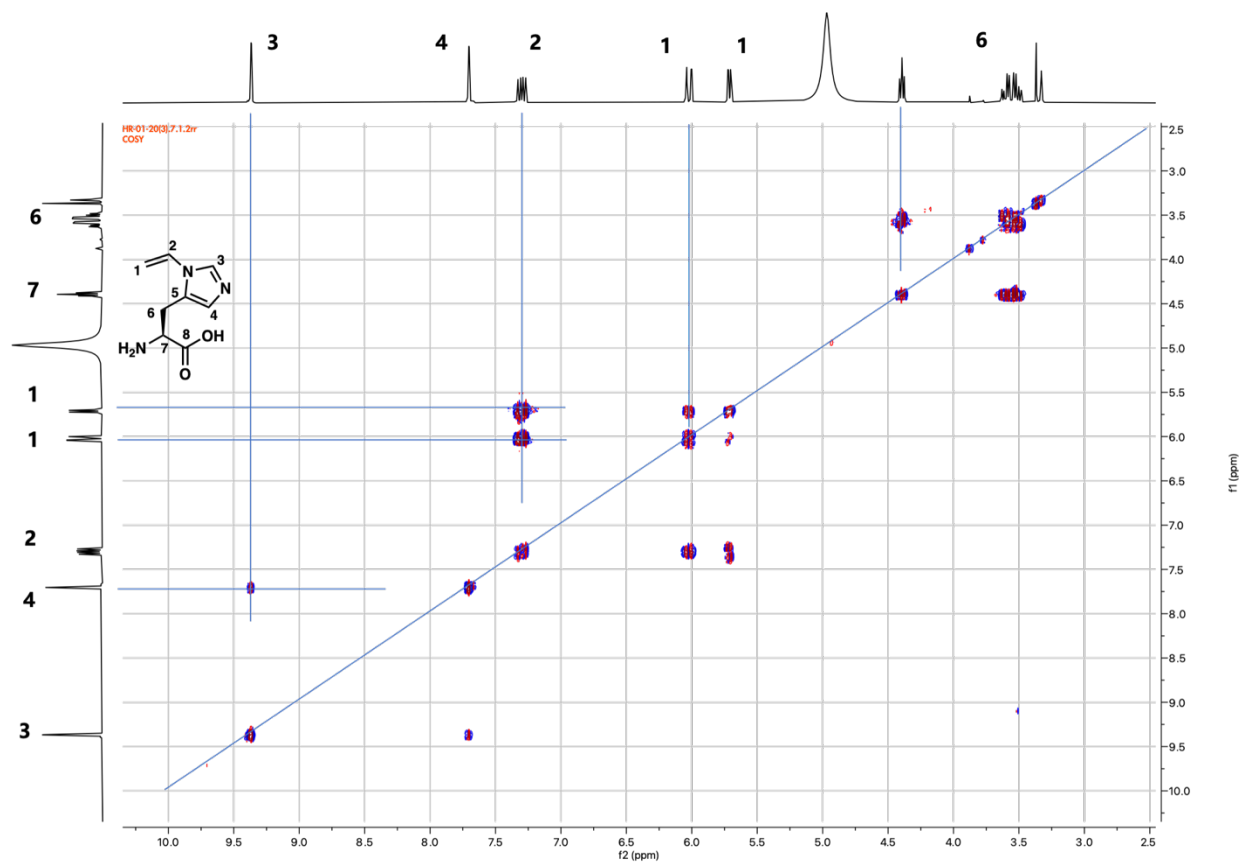

Supplementary Figure 26. HH COSY spectrum for compound 7.

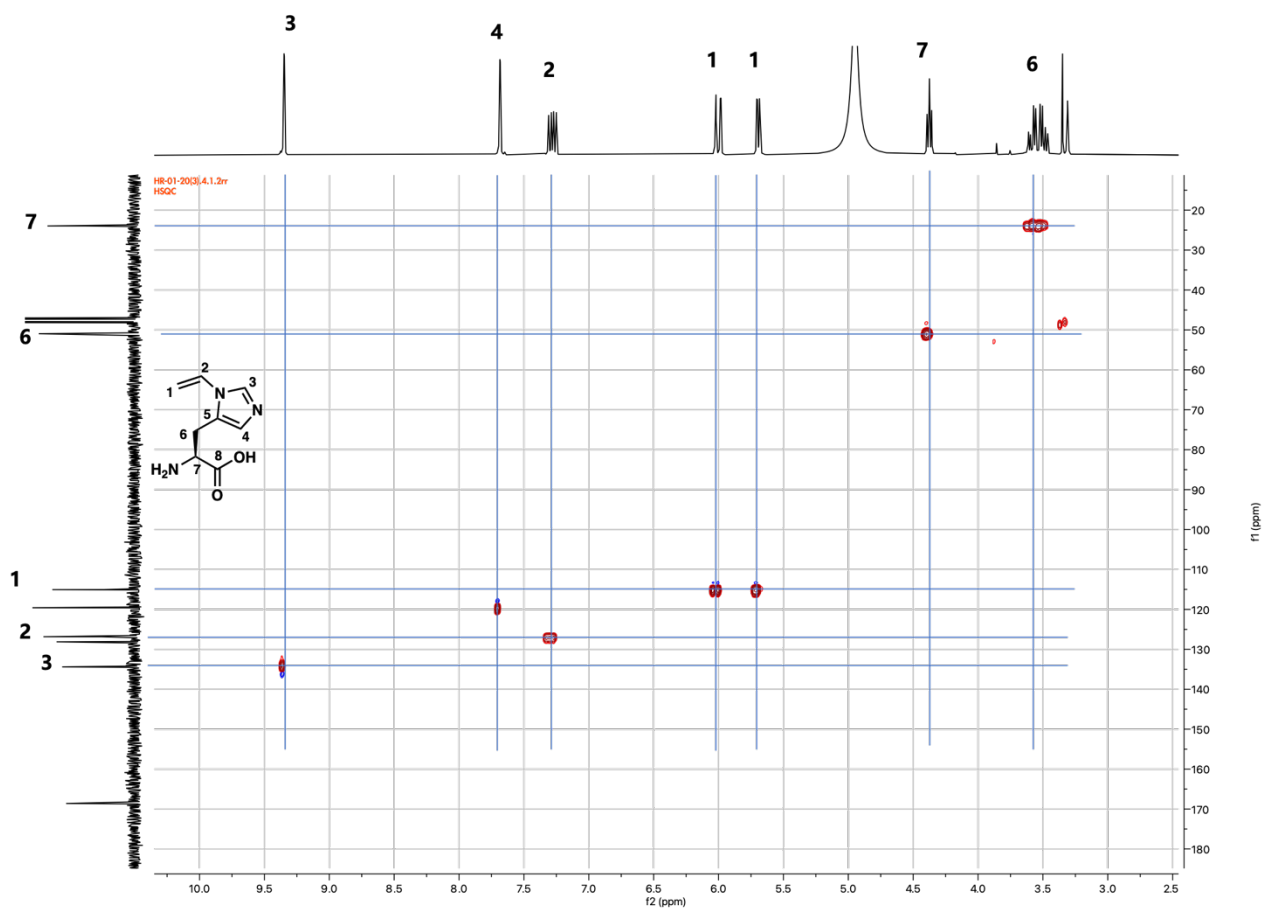

Supplementary Figure 27. HSQC spectrum for compound 7

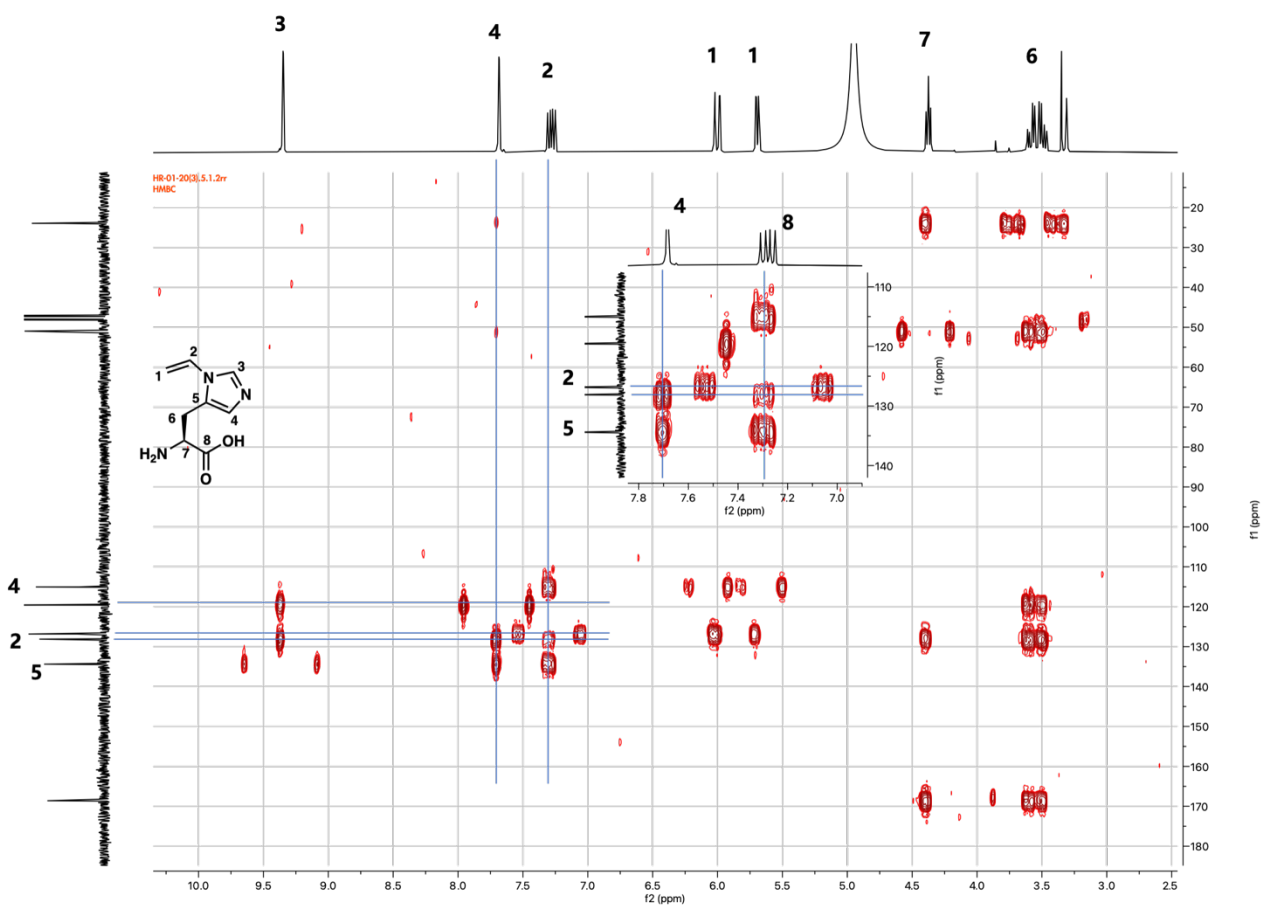

Supplementary Figure 28: HMBC NMR spectrum for compound 7

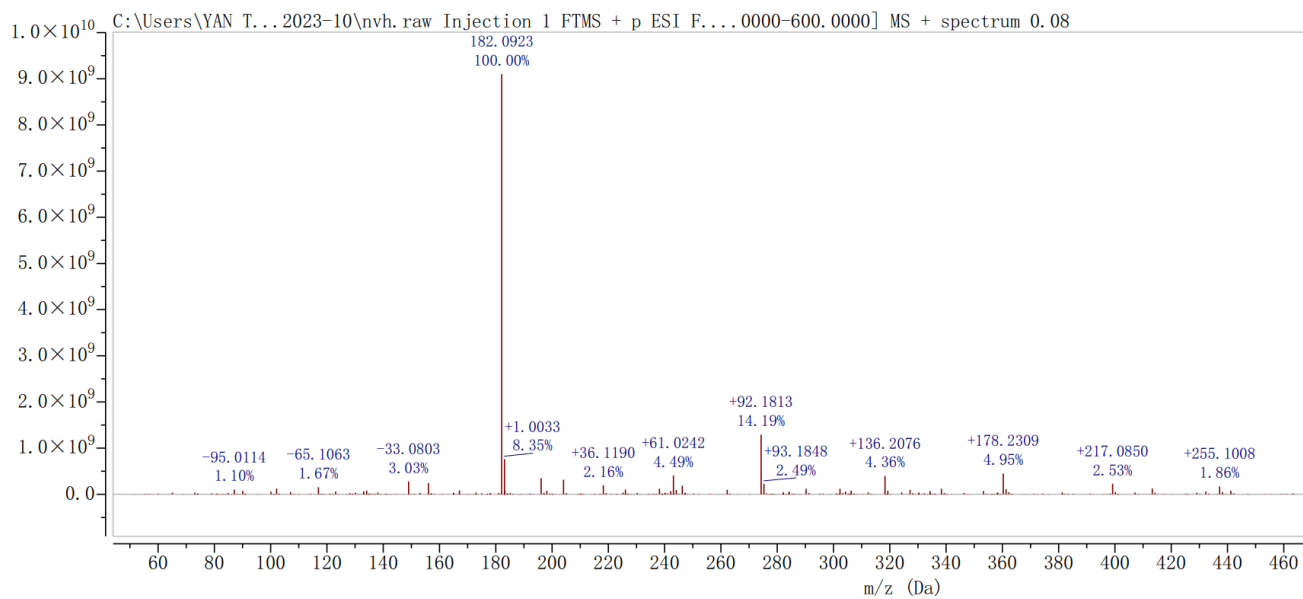

**Supplementary Figure 29:** High-resolution mass spectrum for 7.

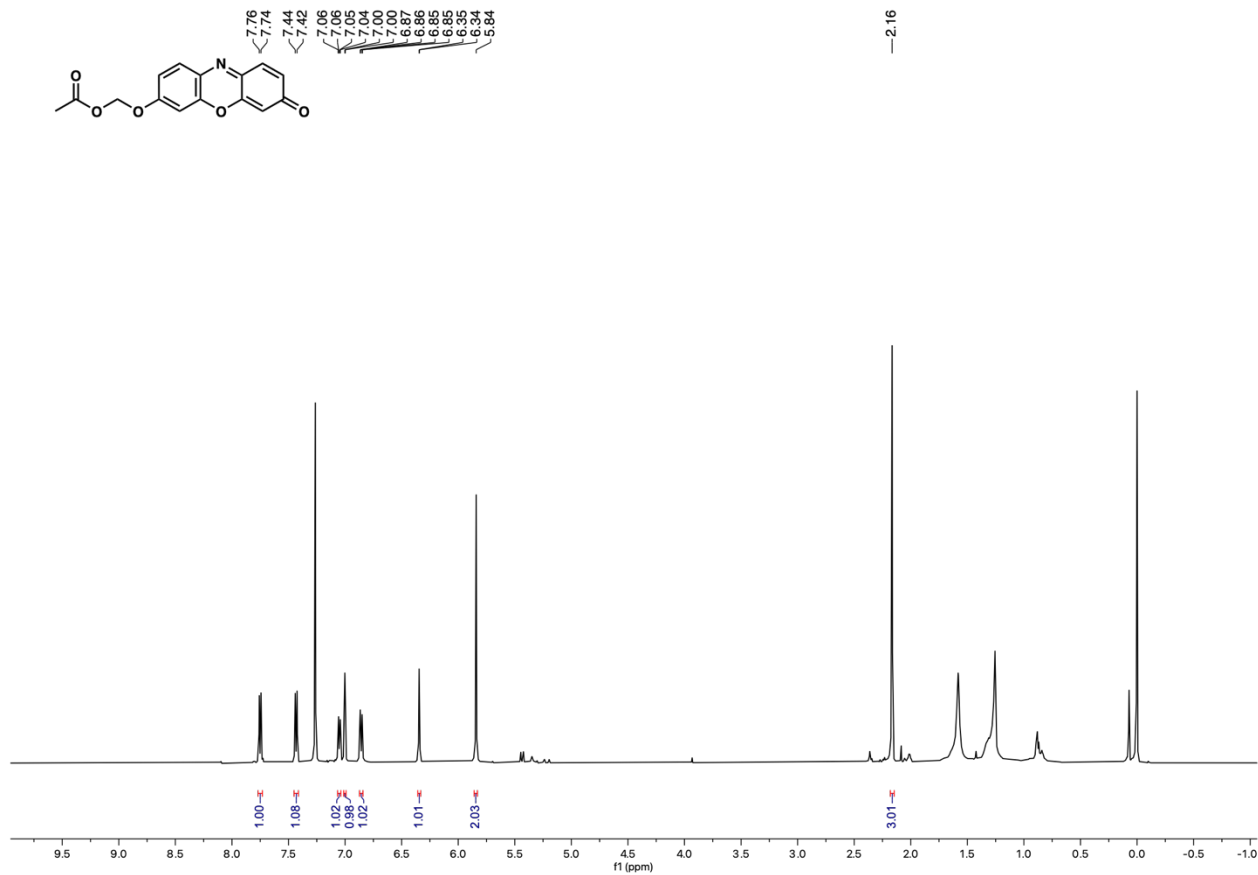

Supplementary Figure 30: <sup>1</sup>H NMR spectrum for A-Me-Res.

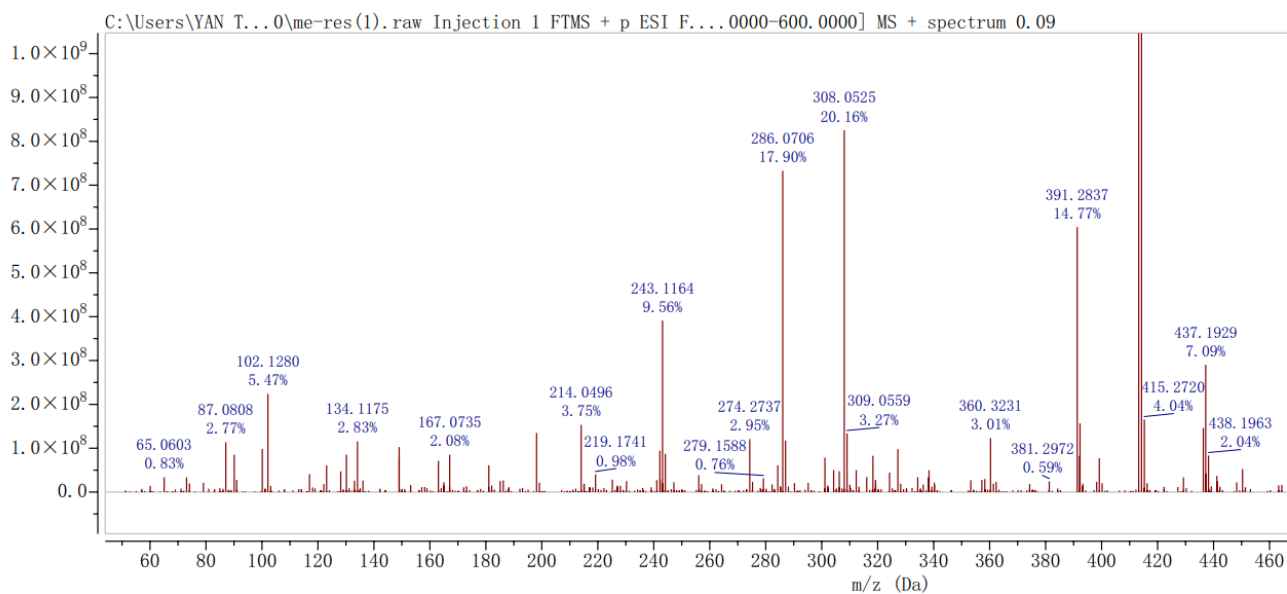

**Supplementary Figure 31:** High-resolution mass spectrum for A-Me-Res..

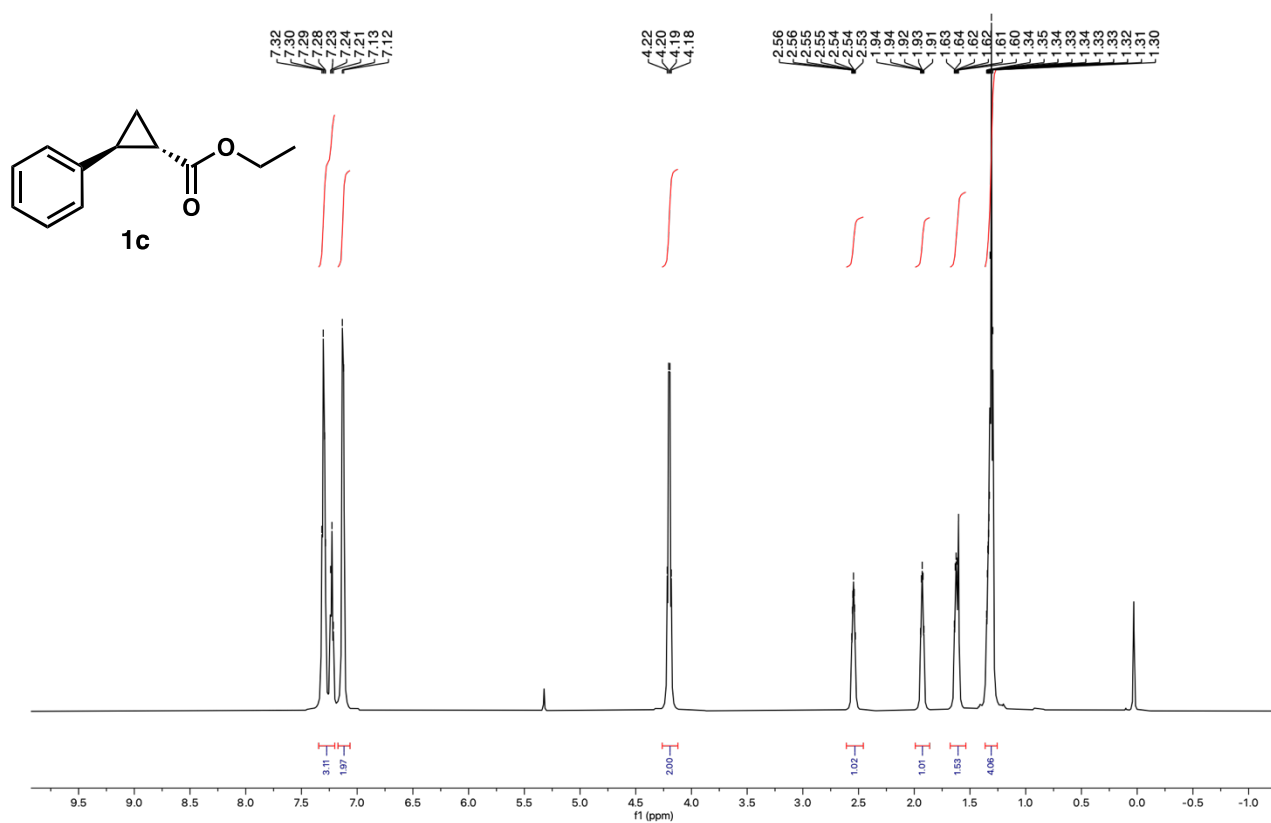

**Supplementary Figure 32:** <sup>1</sup>H NMR spectrum for Mb\*-H93δVinH catalyzed product **1c**.



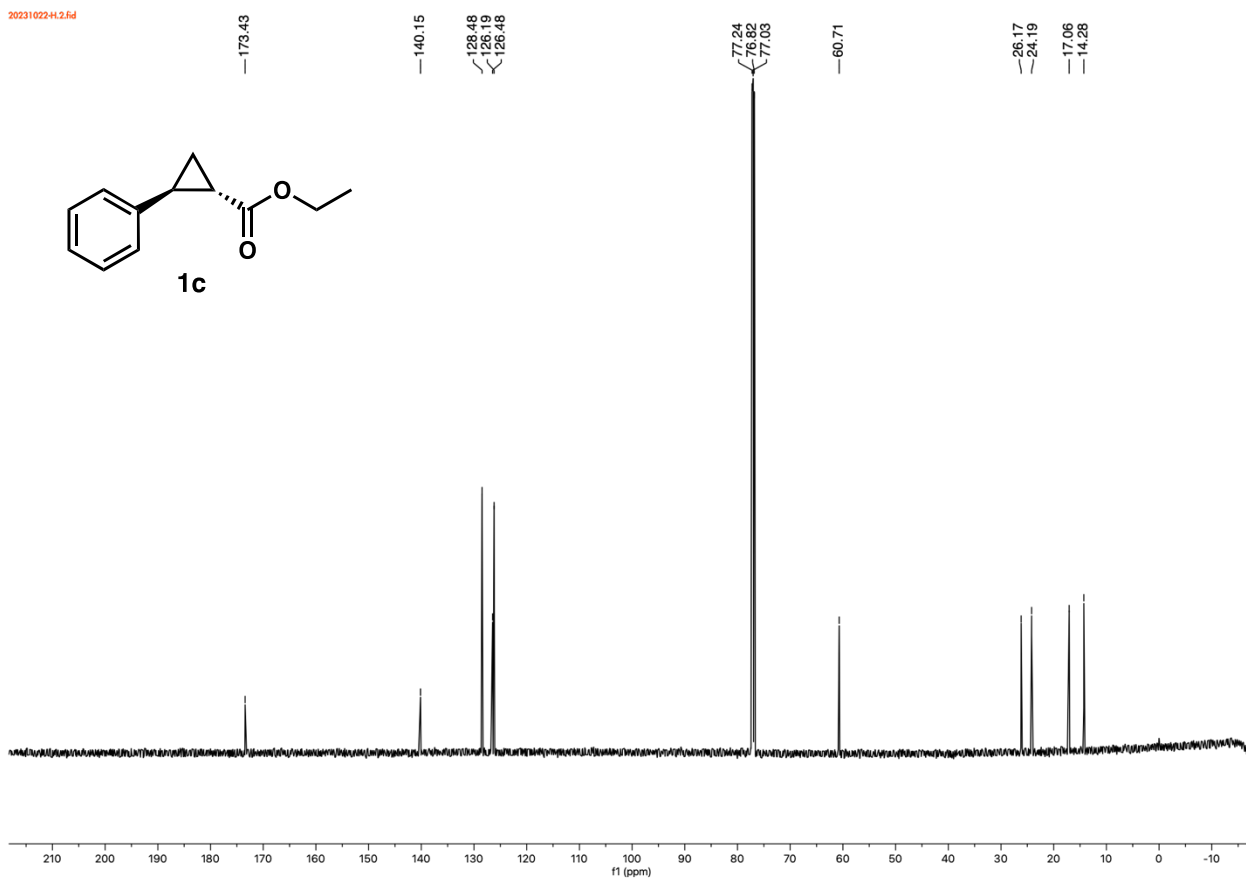

Supplementary Figure 33:  $^{13}\text{C}$  NMR spectrum for Mb\*-H93 $\delta$ VinH catalyzed product **1c**.

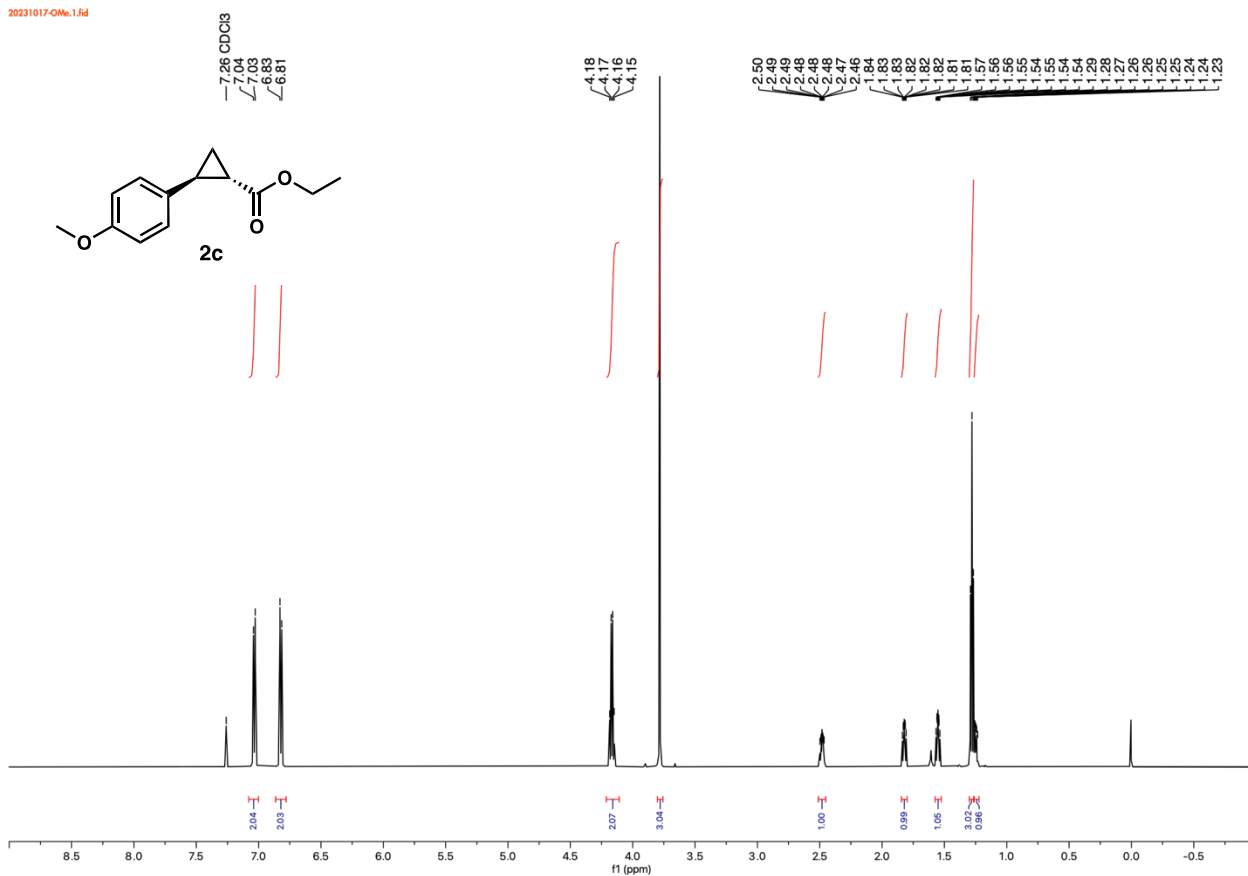

Supplementary Figure 34: <sup>1</sup>H NMR spectrum for Mb\*-H93δVinH catalyzed product **2c**.

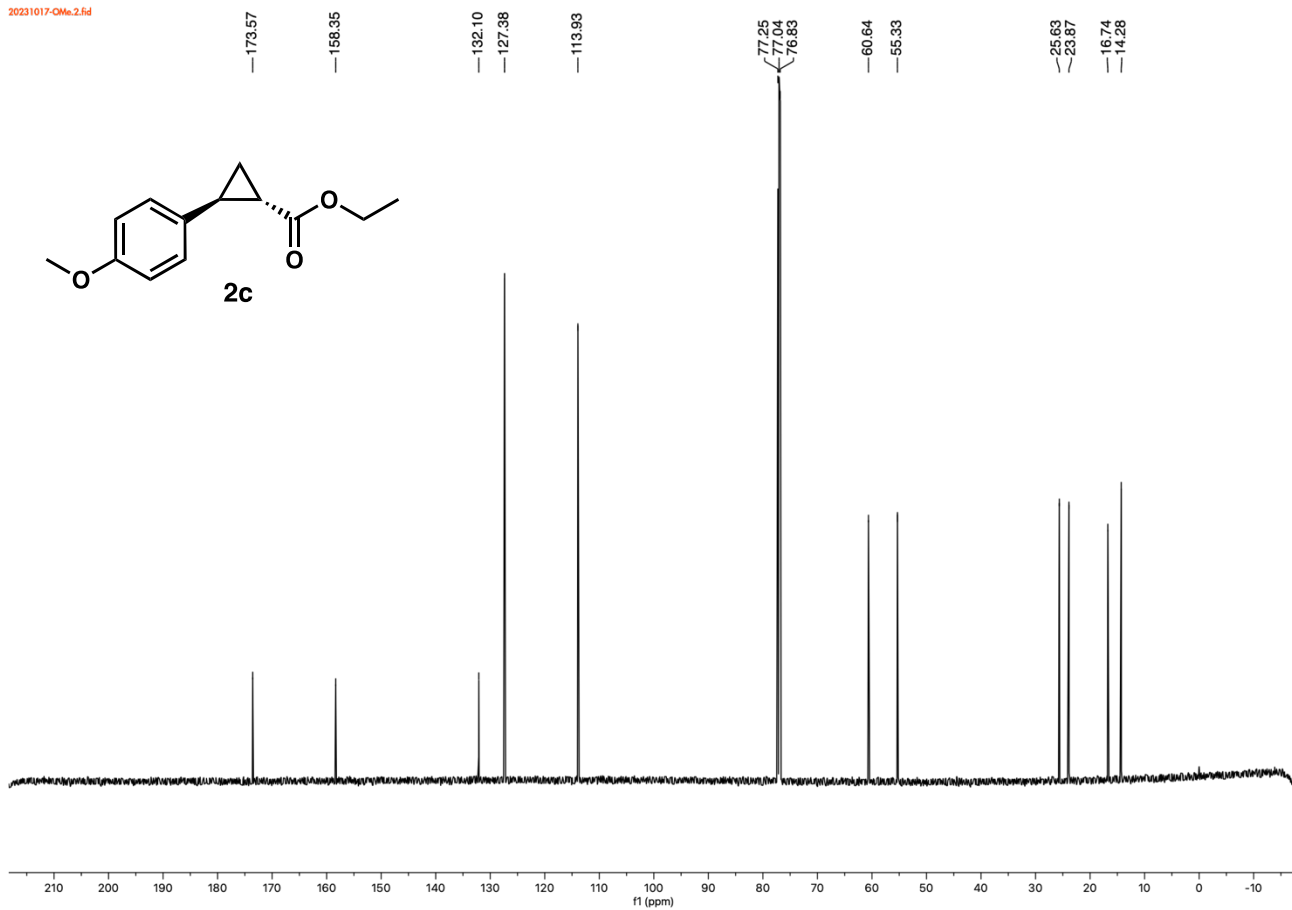

Supplementary Figure 35:  $^{13}\text{C}$  NMR spectrum for Mb\*-H93 $\delta$ VinH catalyzed product **2c**.

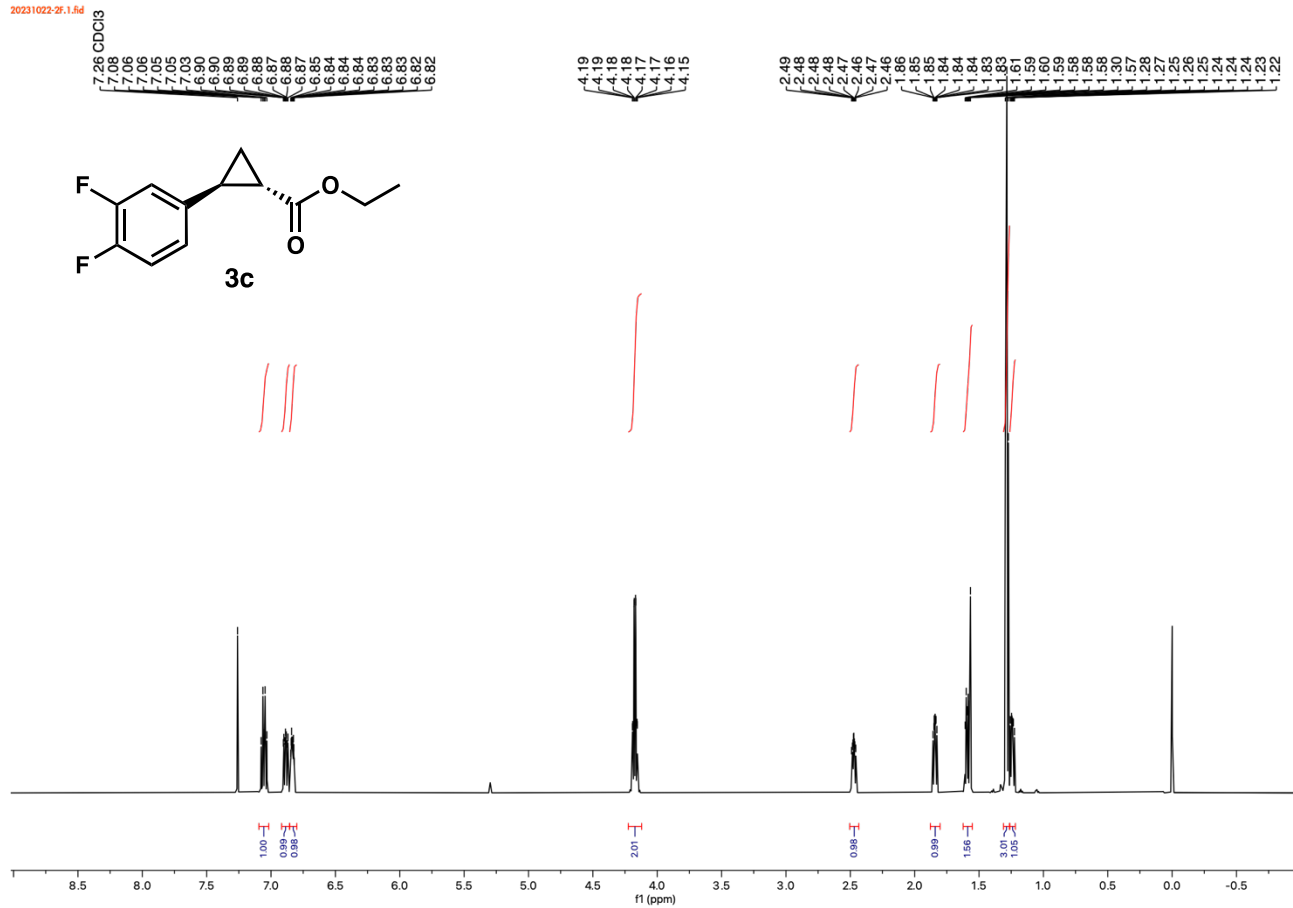

Supplementary Figure 36: <sup>1</sup>H NMR spectrum for Mb\*-H93δVinH catalyzed product **3c**.

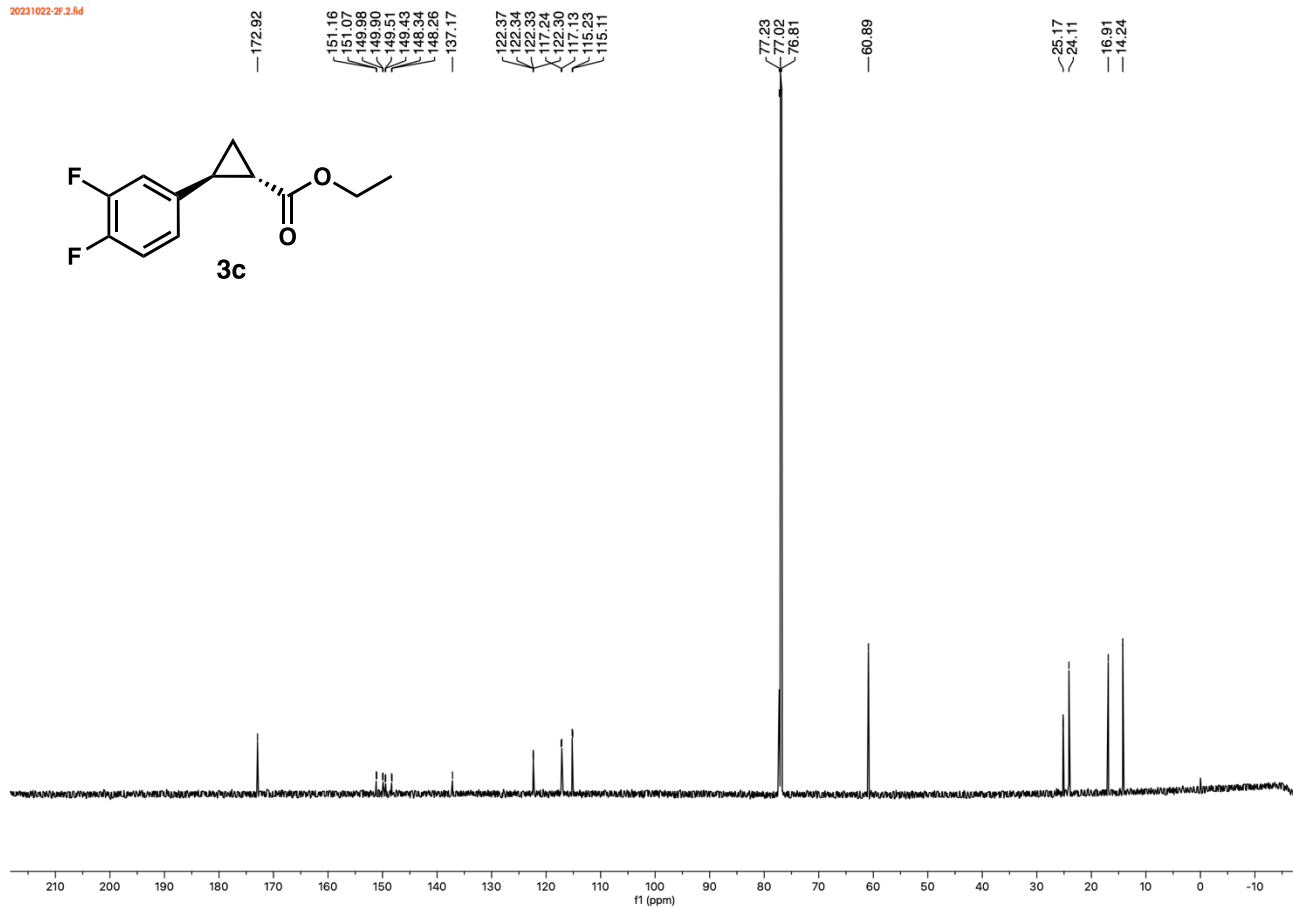

Supplementary Figure 37:  $^{13}\text{C}$  NMR spectrum for Mb\*-H93 $\delta$ VinH catalyzed product **3c**.

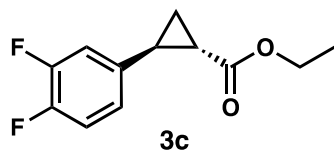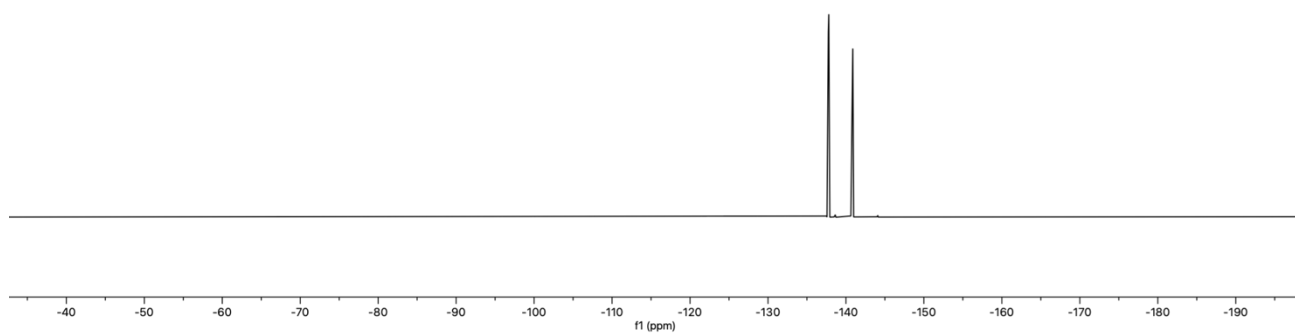

**Supplementary Figure 38:**  $^{19}\text{F}$  NMR spectrum for Mb\*-H93 $\delta$ VinH catalyzed product **3c**.

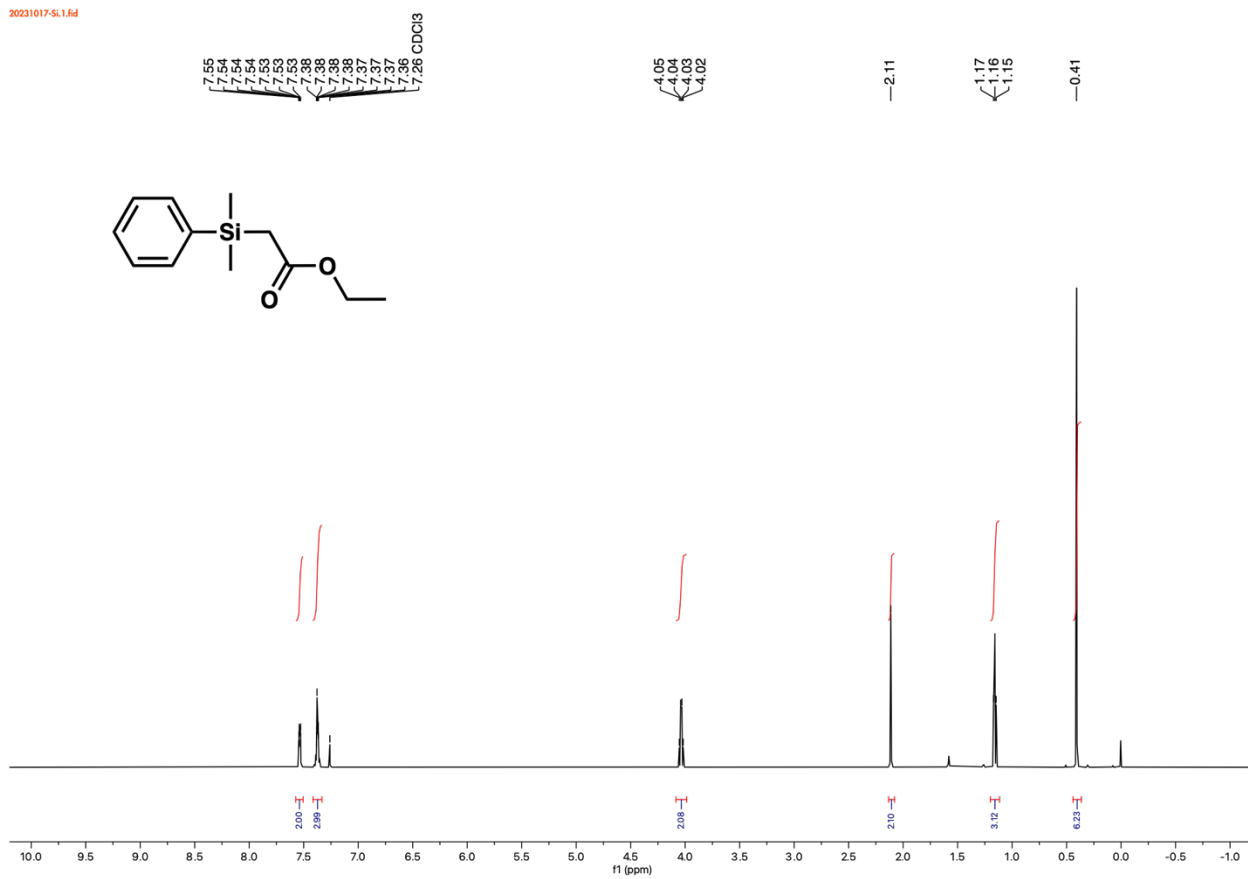

Supplementary Figure 39: <sup>1</sup>H NMR spectrum for Mb\*-H93δVinH catalyzed product **4c**.

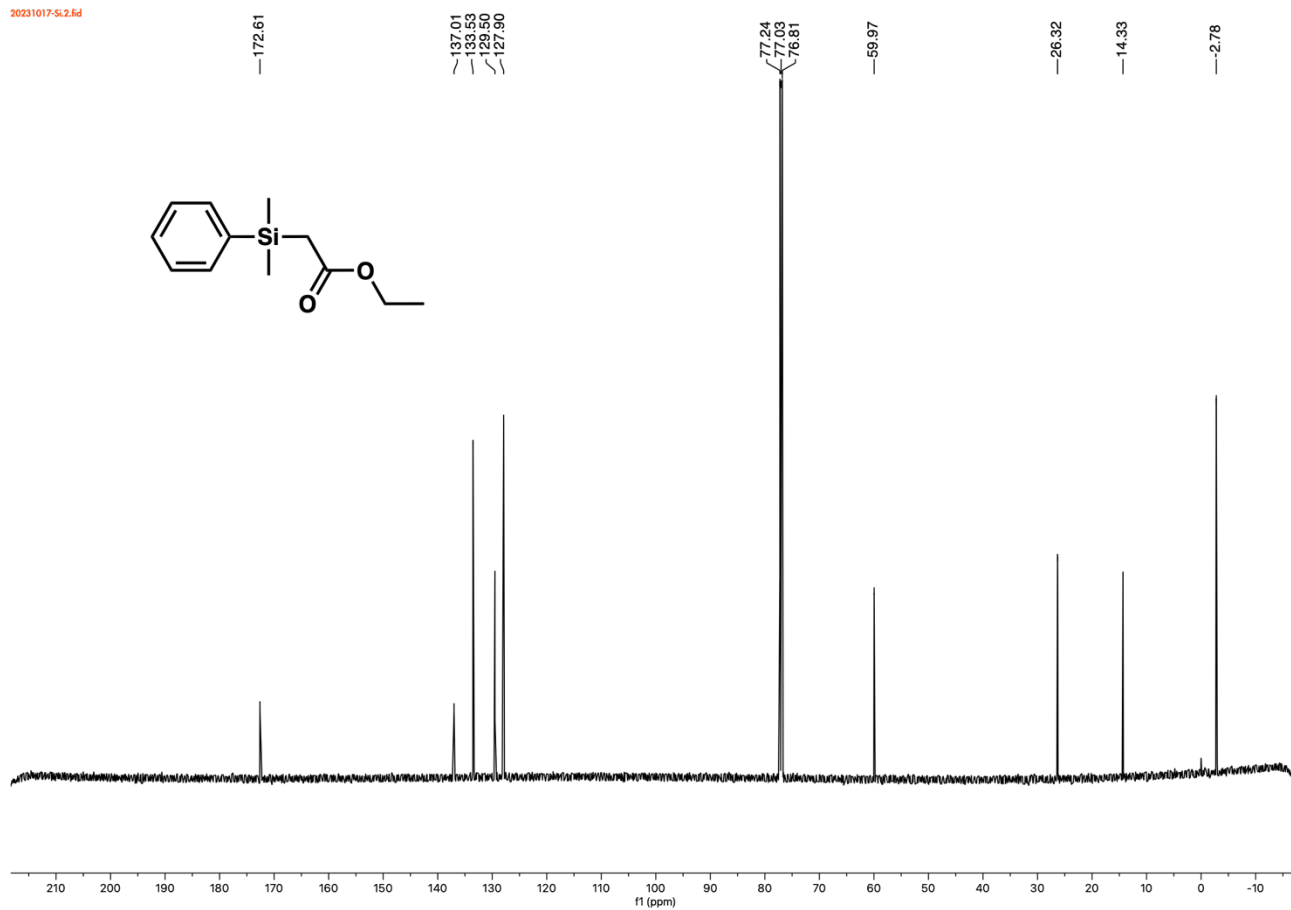

Supplementary Figure 40:  $^{13}\text{C}$  NMR spectrum for Mb\*-H93 $\delta$ VinH catalyzed product **4c**.



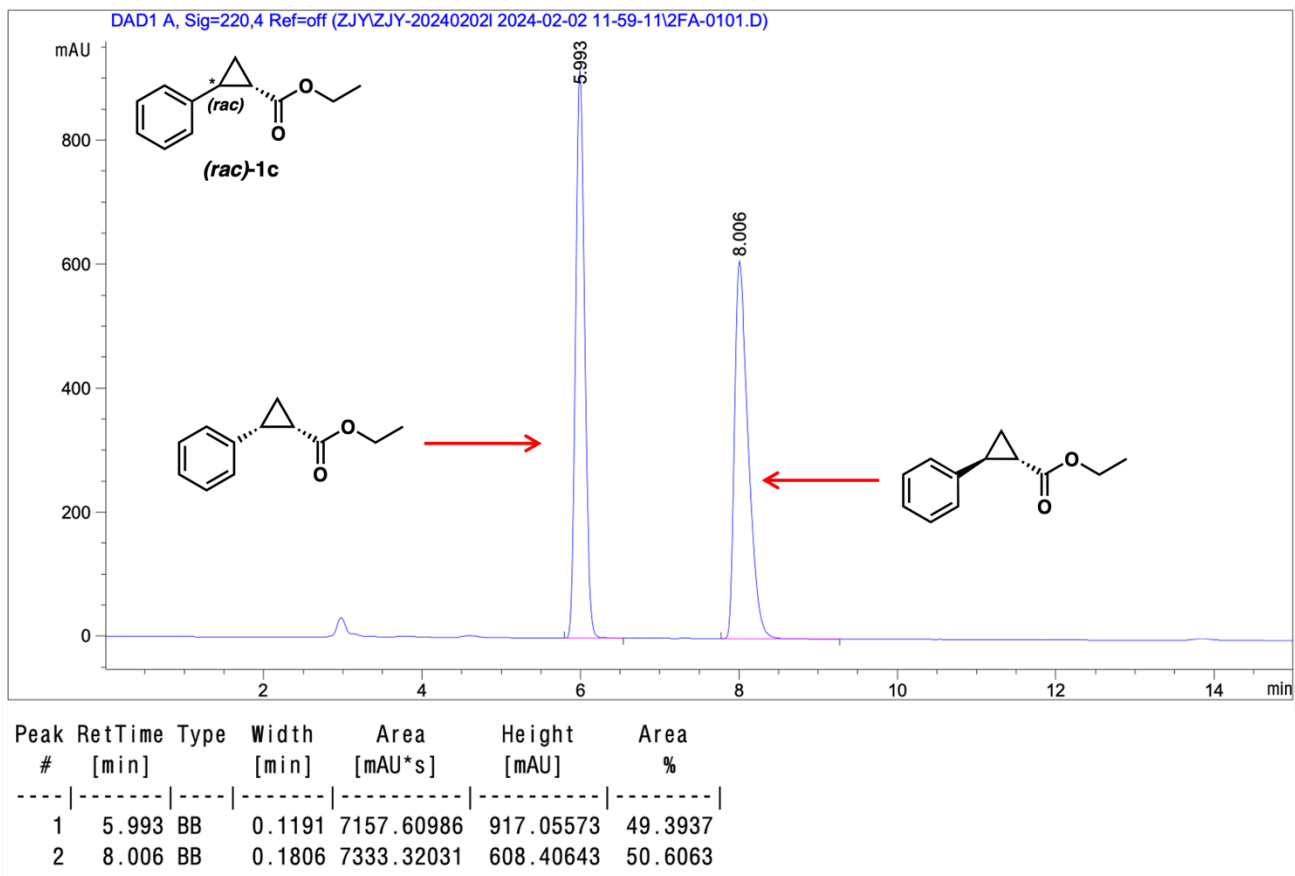

Supplementary Figure 41: chiral HPLC spectrum for *(rac)*-1c.

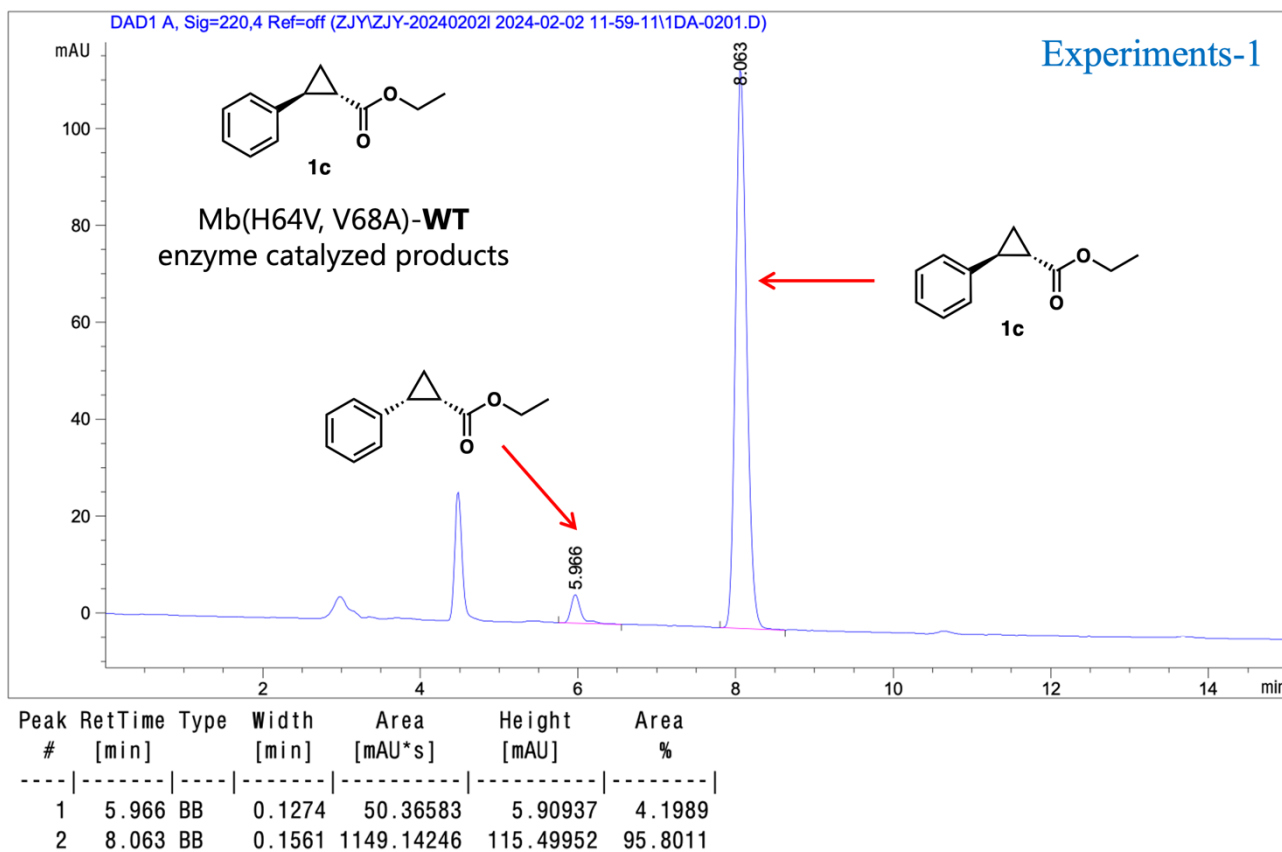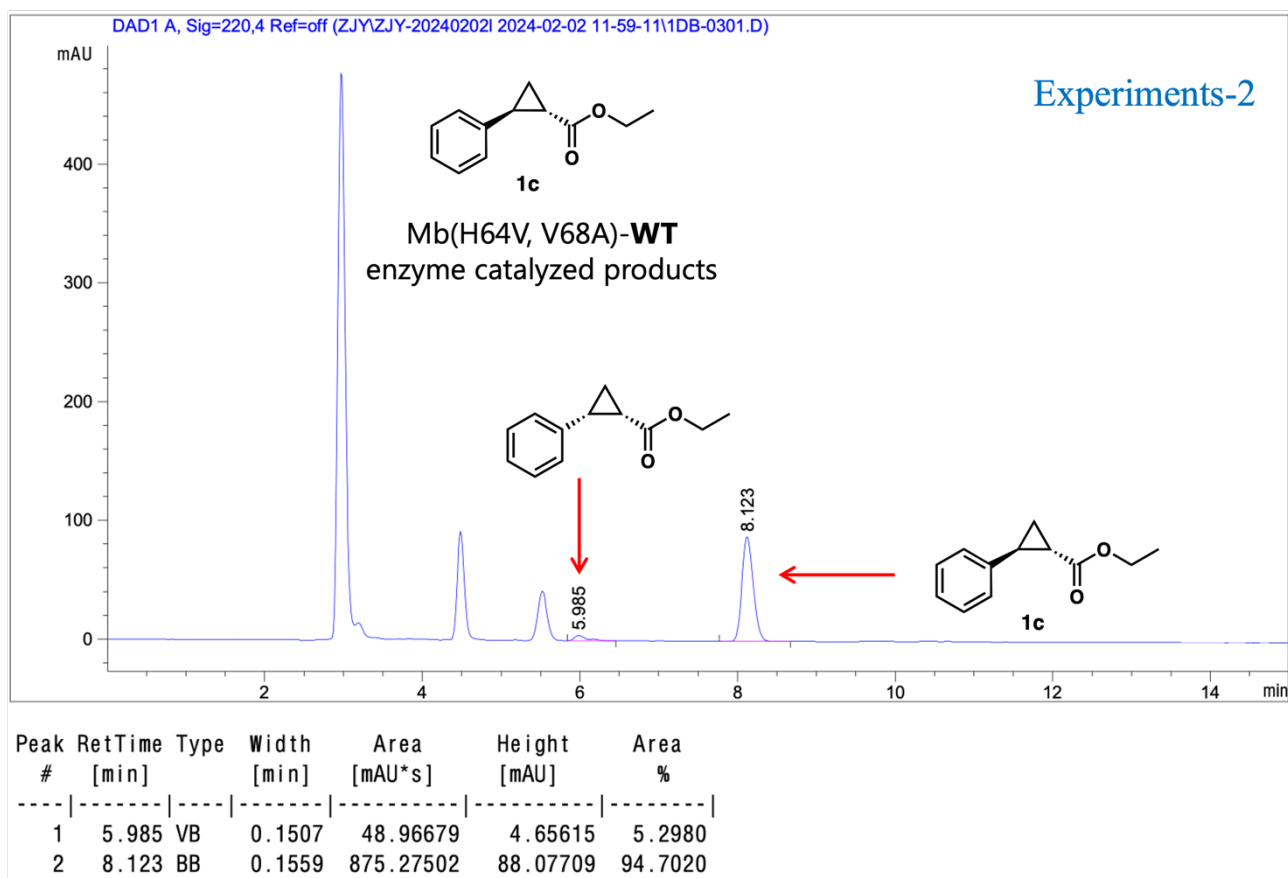

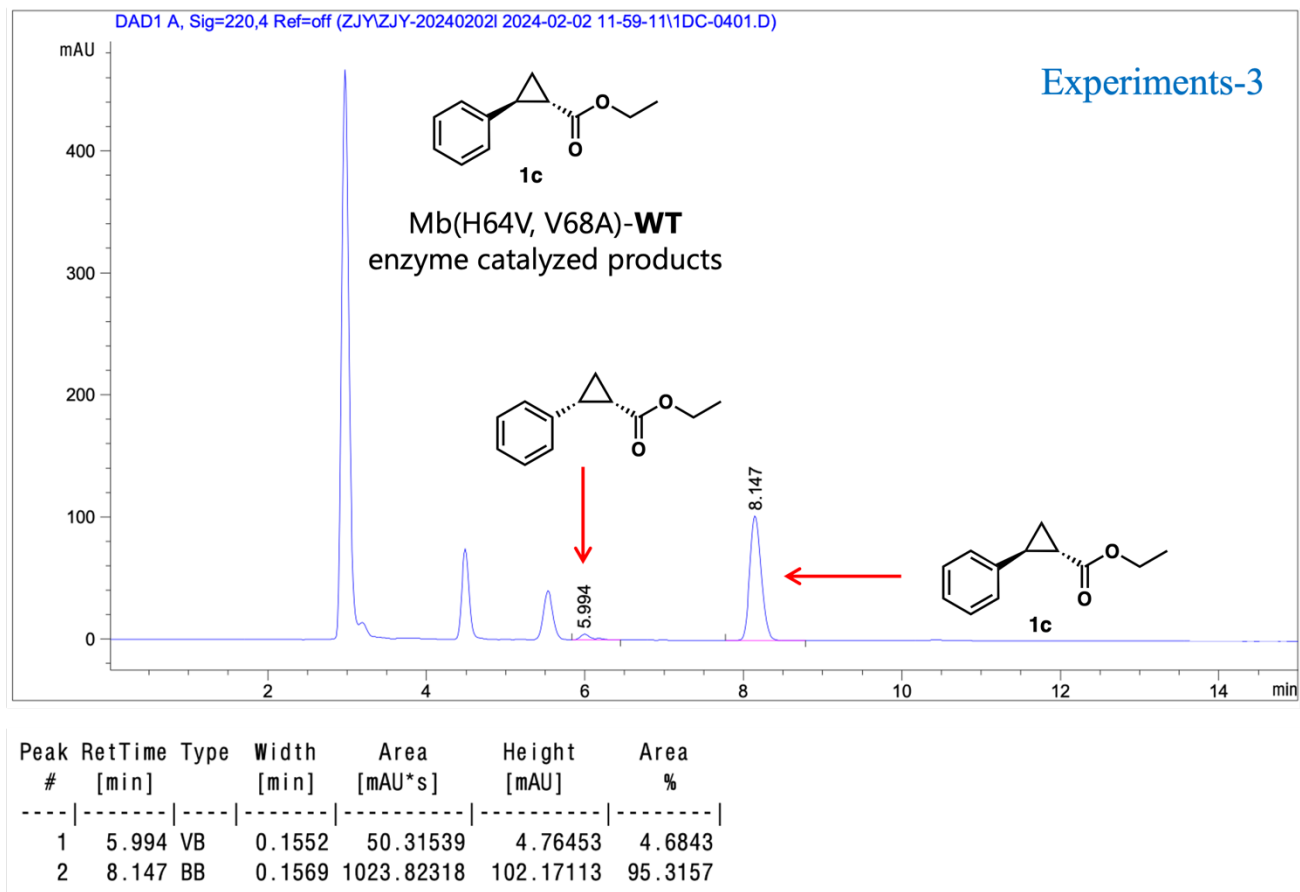

**Supplementary Figure 42:** chiral HPLC spectrum for **1c**(Mb\*- $\delta$ MeH catalyzed product).

## Experiments-1

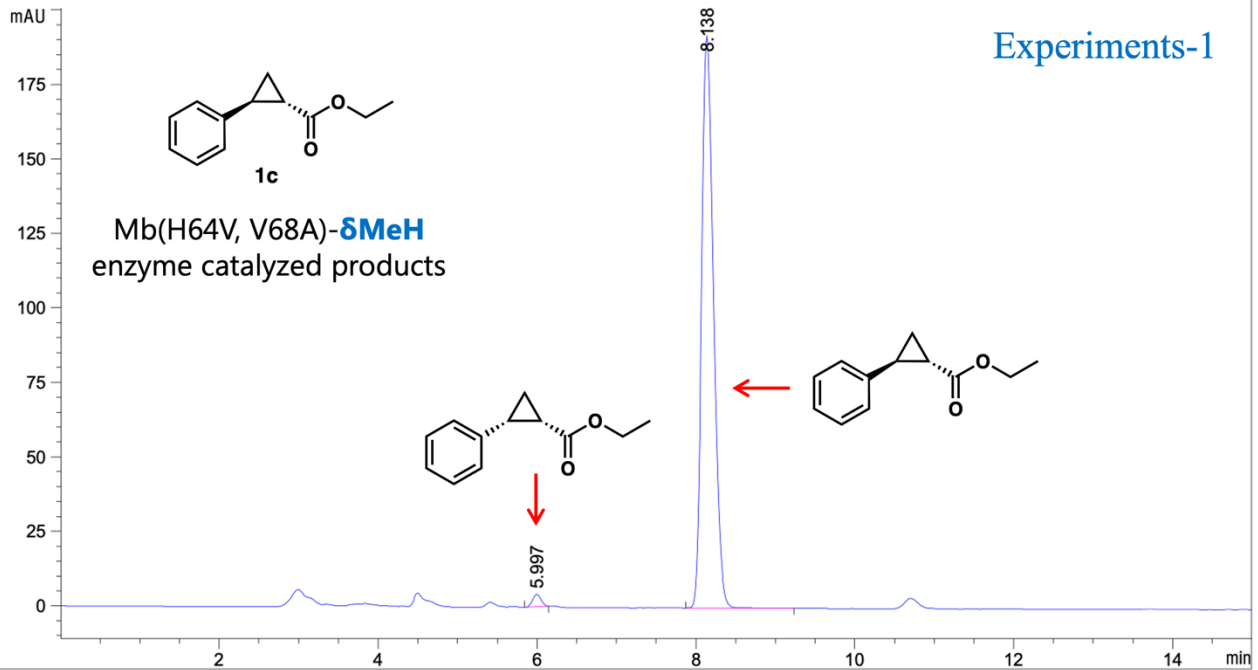

| Peak # | RetTime [min] | Type | Width [min] | Area [mAU*s] | Height [mAU] | Area %  |
|--------|---------------|------|-------------|--------------|--------------|---------|
| 1      | 5.997         | BB   | 0.1111      | 29.36757     | 4.12502      | 1.4611  |
| 2      | 8.138         | BB   | 0.1603      | 1980.56921   | 192.03246    | 98.5389 |

## Experiments-2

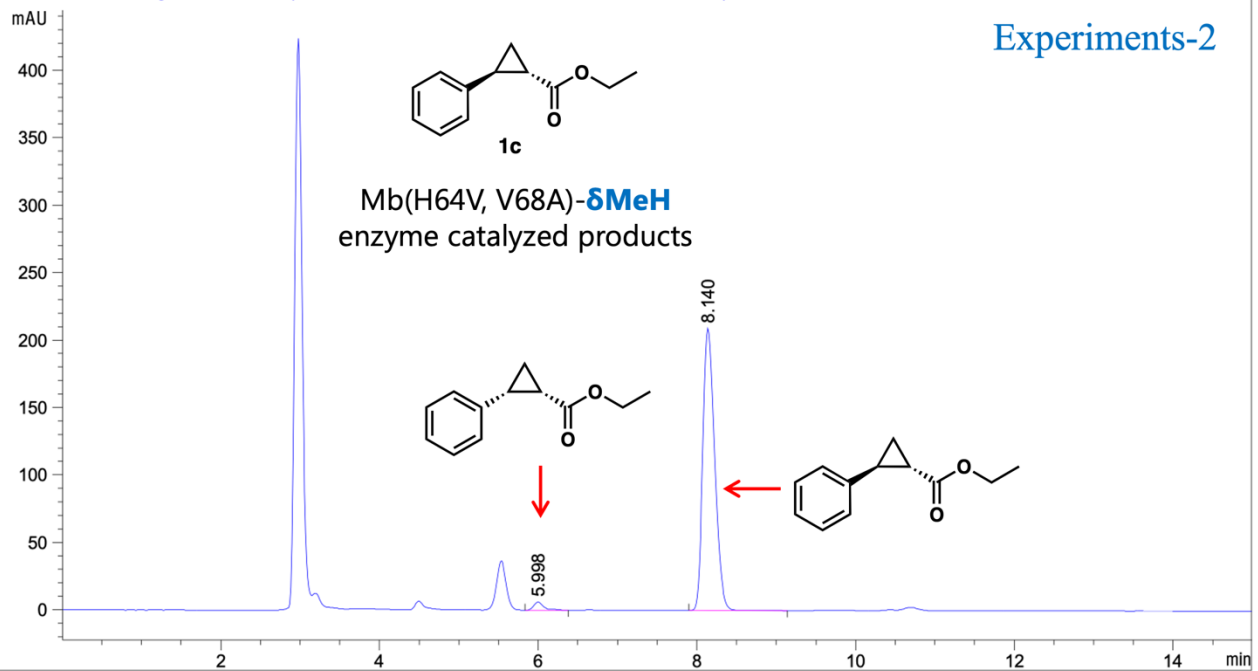

| Peak # | RetTime [min] | Type | Width [min] | Area [mAU*s] | Height [mAU] | Area %  |
|--------|---------------|------|-------------|--------------|--------------|---------|
| 1      | 5.998         | BB   | 0.1326      | 50.54970     | 5.86471      | 2.2783  |
| 2      | 8.140         | BB   | 0.1610      | 2168.17017   | 209.04980    | 97.7217 |

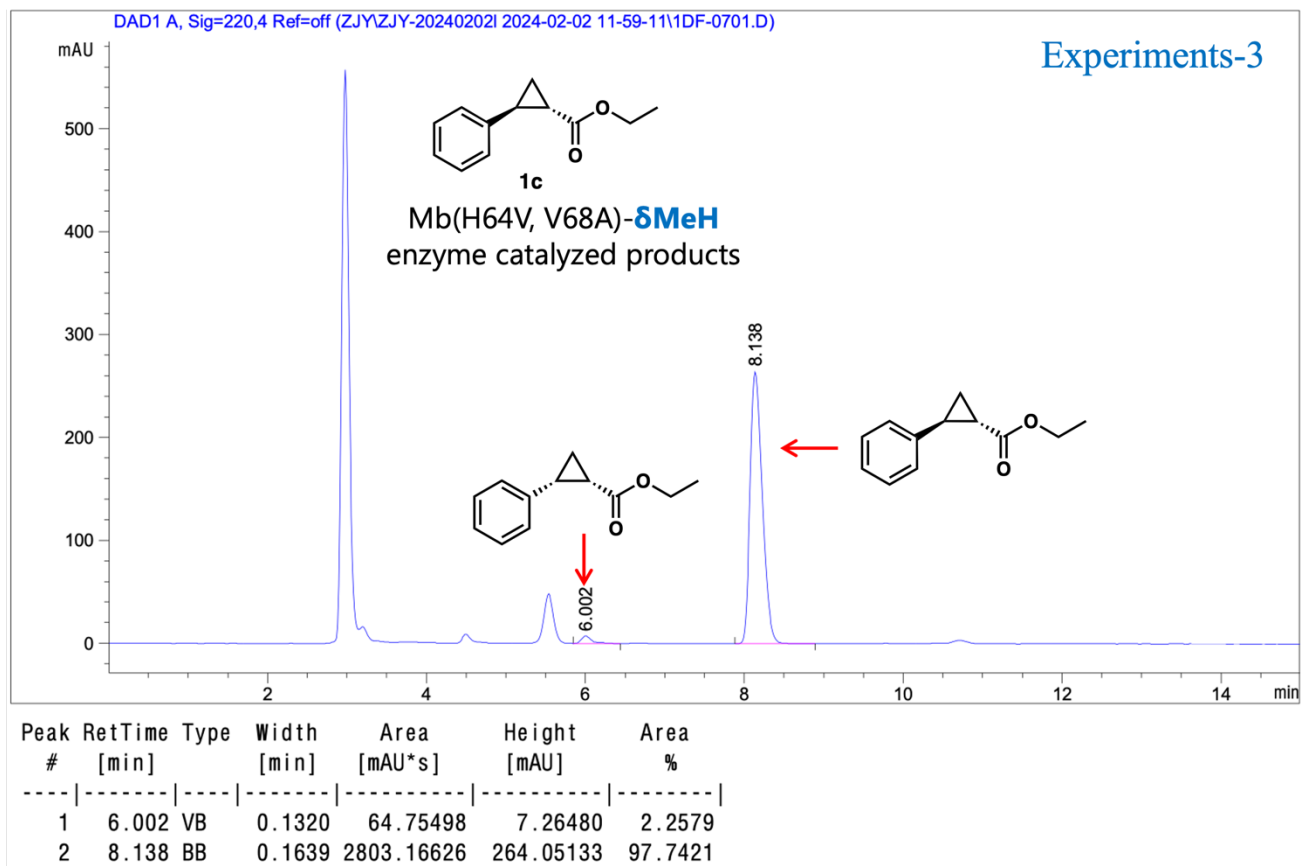

Supplementary Figure 43: chiral HPLC spectrum for **1c**(Mb\*- $\delta$ MeH catalyzed product).

## Experiments-1

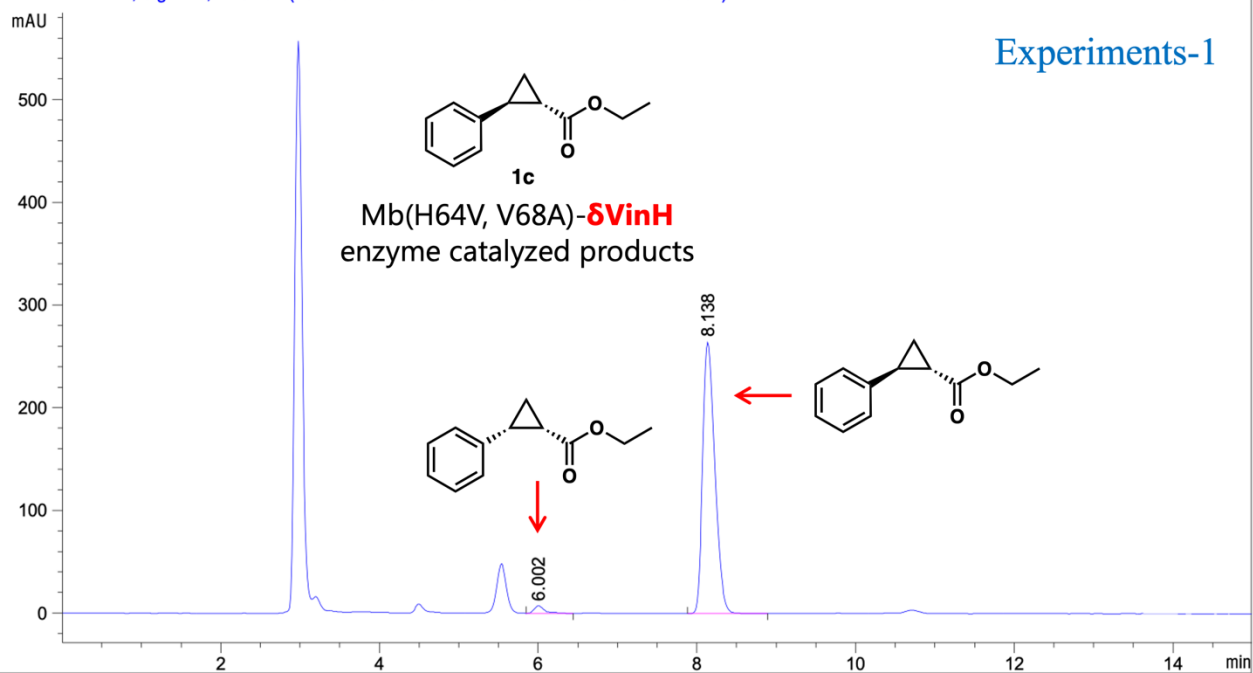

| Peak # | RetTime [min] | Type | Width [min] | Area [mAU*s] | Height [mAU] | Area %  |
|--------|---------------|------|-------------|--------------|--------------|---------|
| 1      | 6.002         | VB   | 0.1320      | 64.75498     | 7.26480      | 2.2579  |
| 2      | 8.138         | BB   | 0.1639      | 2803.16626   | 264.05133    | 97.7421 |

## Experiments-2

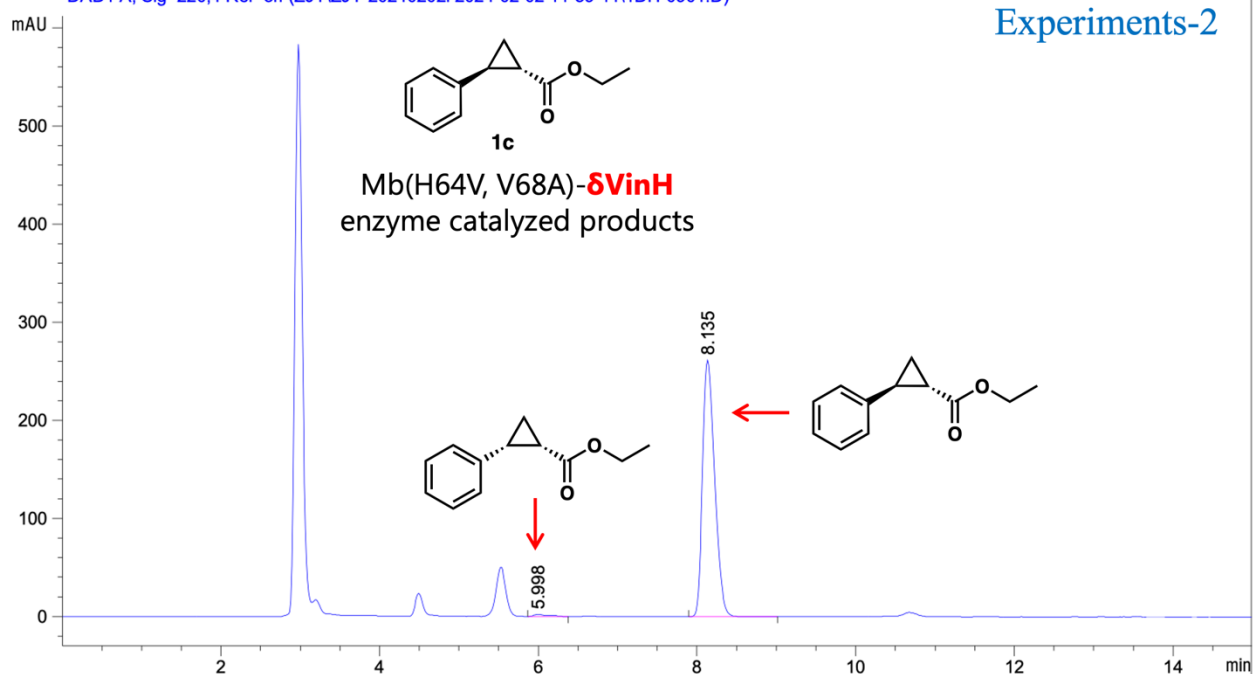

| Peak # | RetTime [min] | Type | Width [min] | Area [mAU*s] | Height [mAU] | Area %  |
|--------|---------------|------|-------------|--------------|--------------|---------|
| 1      | 5.998         | VB   | 0.1704      | 27.72541     | 2.33766      | 0.9914  |
| 2      | 8.135         | BB   | 0.1634      | 2768.74170   | 261.71909    | 99.0086 |

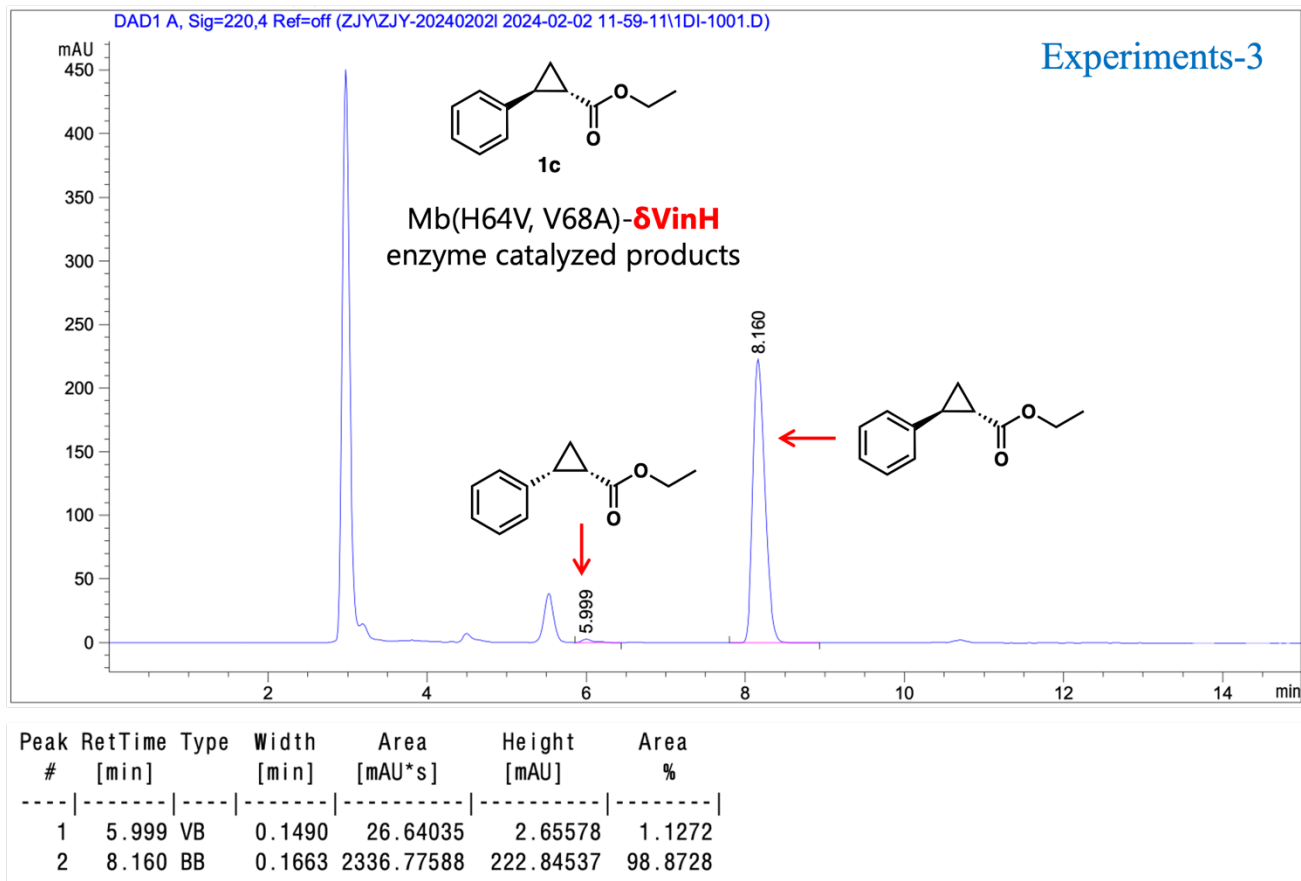

**Supplementary Figure 44:** chiral HPLC spectrum for **1c**(Mb\* $\delta$ VinH catalyzed product).

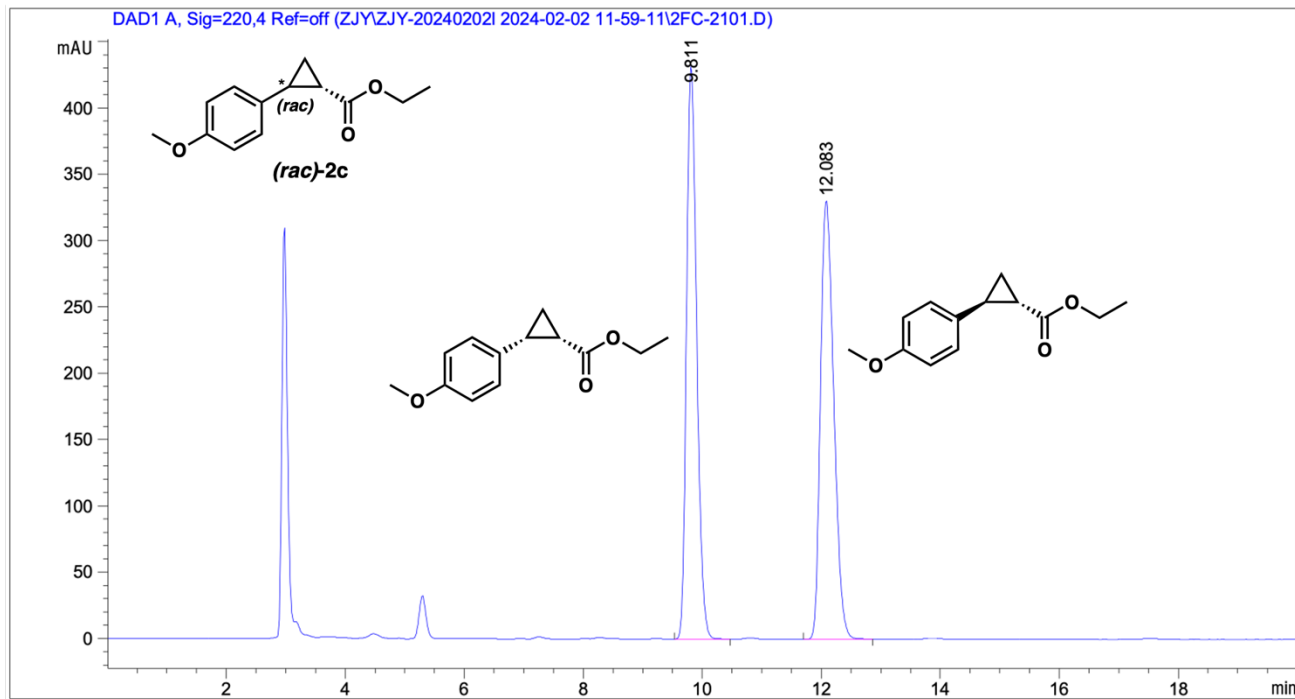

| Peak # | RetTime [min] | Type | Width [min] | Area [mAU*s] | Height [mAU] | Area %  |
|--------|---------------|------|-------------|--------------|--------------|---------|
| 1      | 9.811         | BB   | 0.1821      | 5104.73193   | 431.11008    | 49.9294 |
| 2      | 12.083        | BB   | 0.2447      | 5119.17578   | 330.47058    | 50.0706 |

Supplementary Figure 45: chiral HPLC spectrum for (rac)-2c.



## Experiments-1

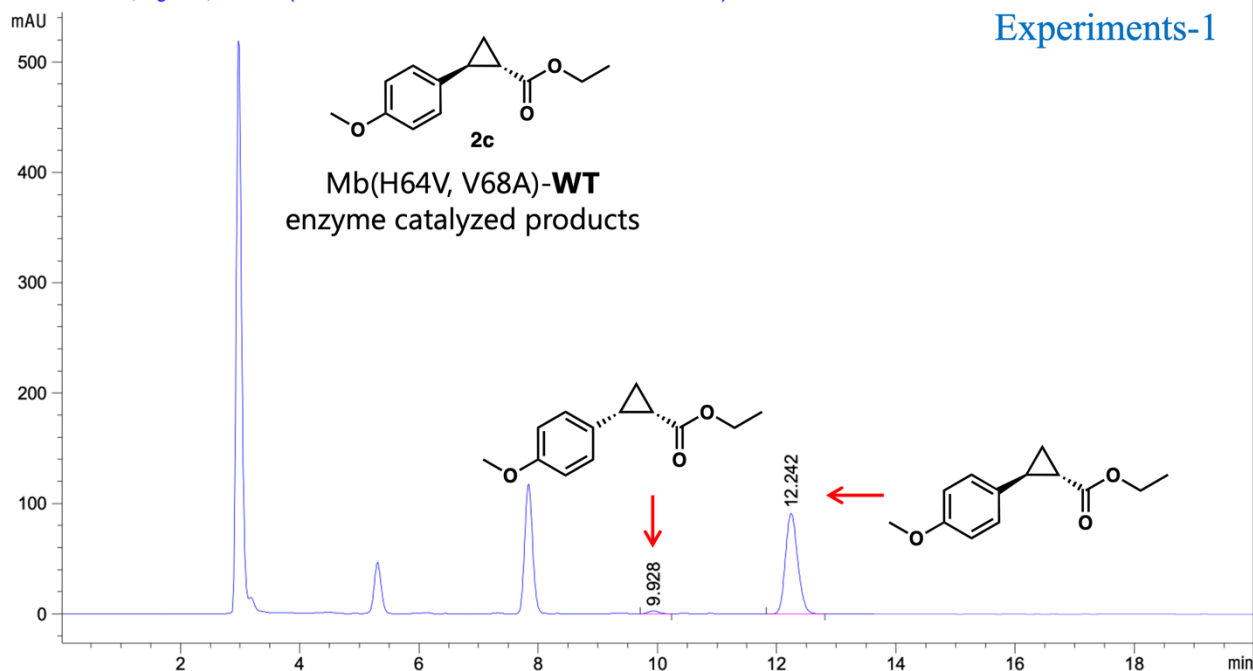

| Peak # | RetTime [min] | Type | Width [min] | Area [mAU*s] | Height [mAU] | Area %  |
|--------|---------------|------|-------------|--------------|--------------|---------|
| 1      | 9.928         | BB   | 0.1811      | 30.86967     | 2.62635      | 2.3174  |
| 2      | 12.242        | BB   | 0.2225      | 1301.21118   | 91.18253     | 97.6826 |

## Experiments-2

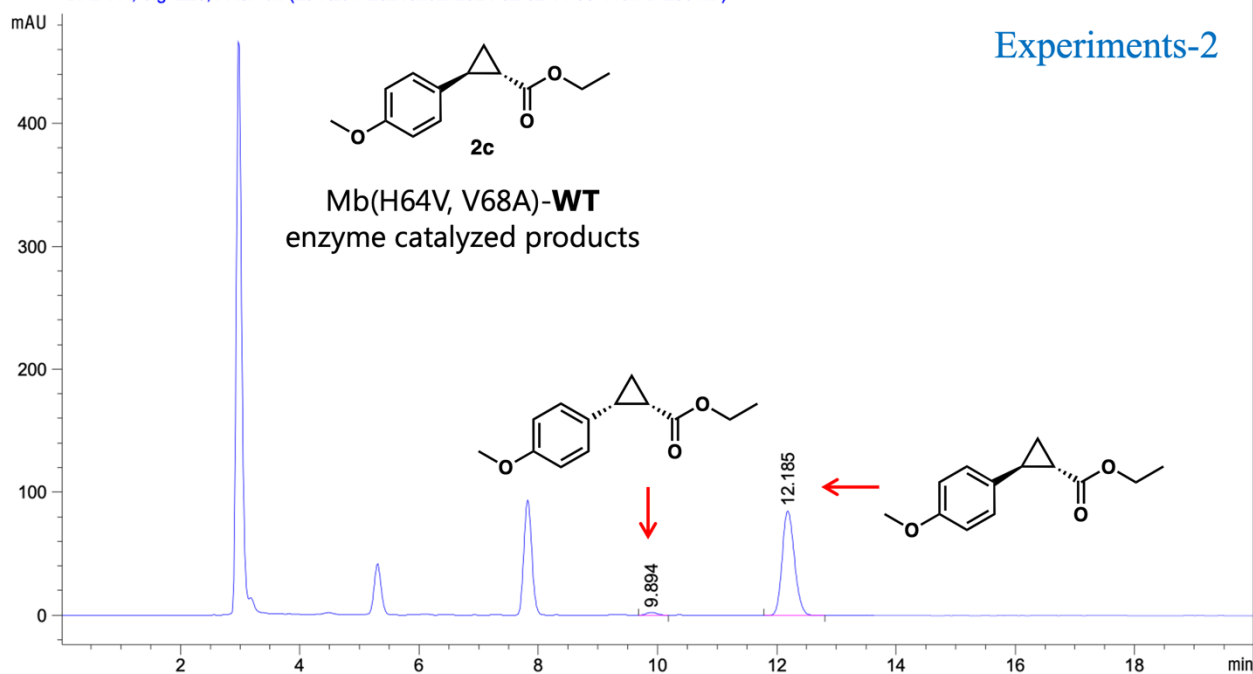

| Peak # | RetTime [min] | Type | Width [min] | Area [mAU*s] | Height [mAU] | Area %  |
|--------|---------------|------|-------------|--------------|--------------|---------|
| 1      | 9.894         | BB   | 0.1912      | 29.45900     | 2.39959      | 2.3616  |
| 2      | 12.185        | BB   | 0.2231      | 1217.98157   | 85.01524     | 97.6384 |

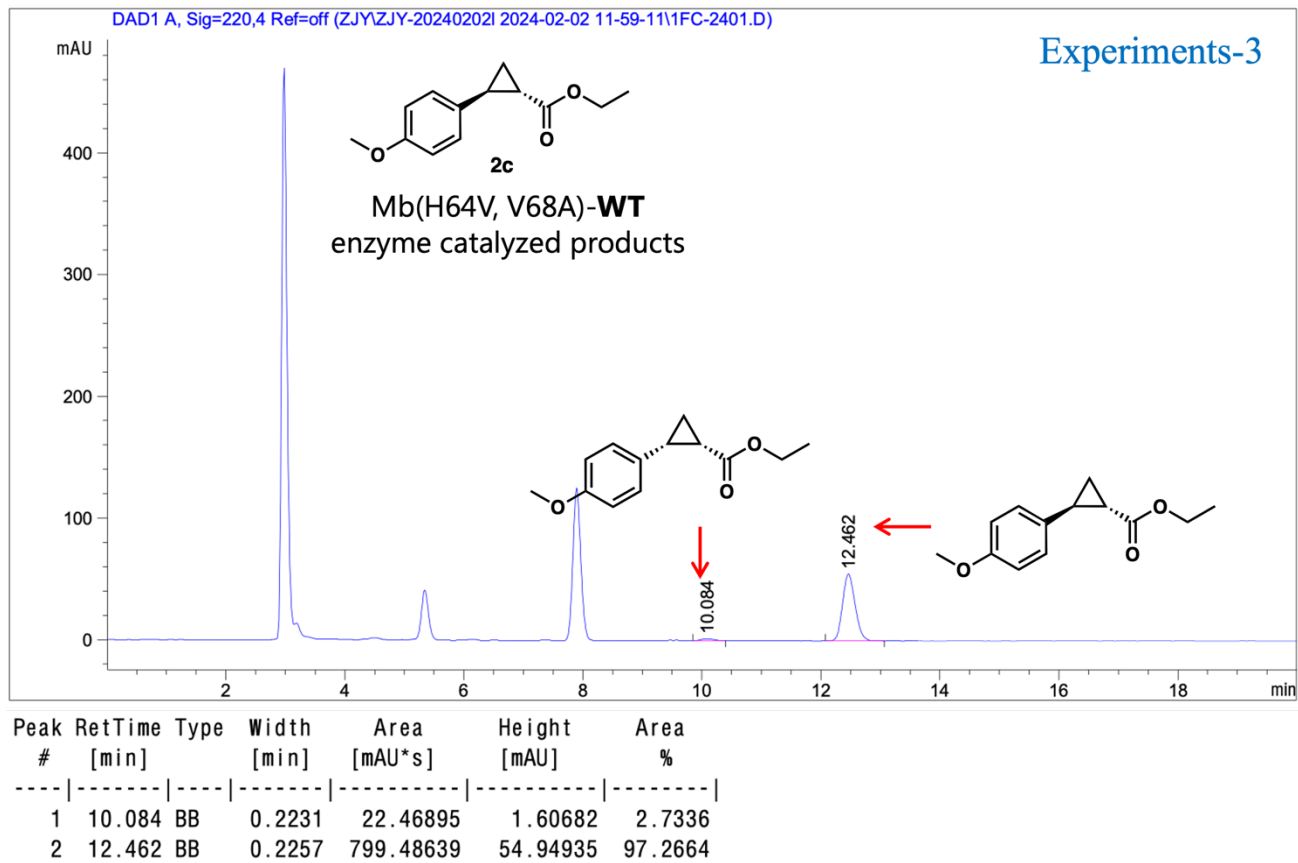

Supplementary Figure 46: chiral HPLC spectrum for **2c**(Mb\*-WT catalyzed product).

## Experiments-1

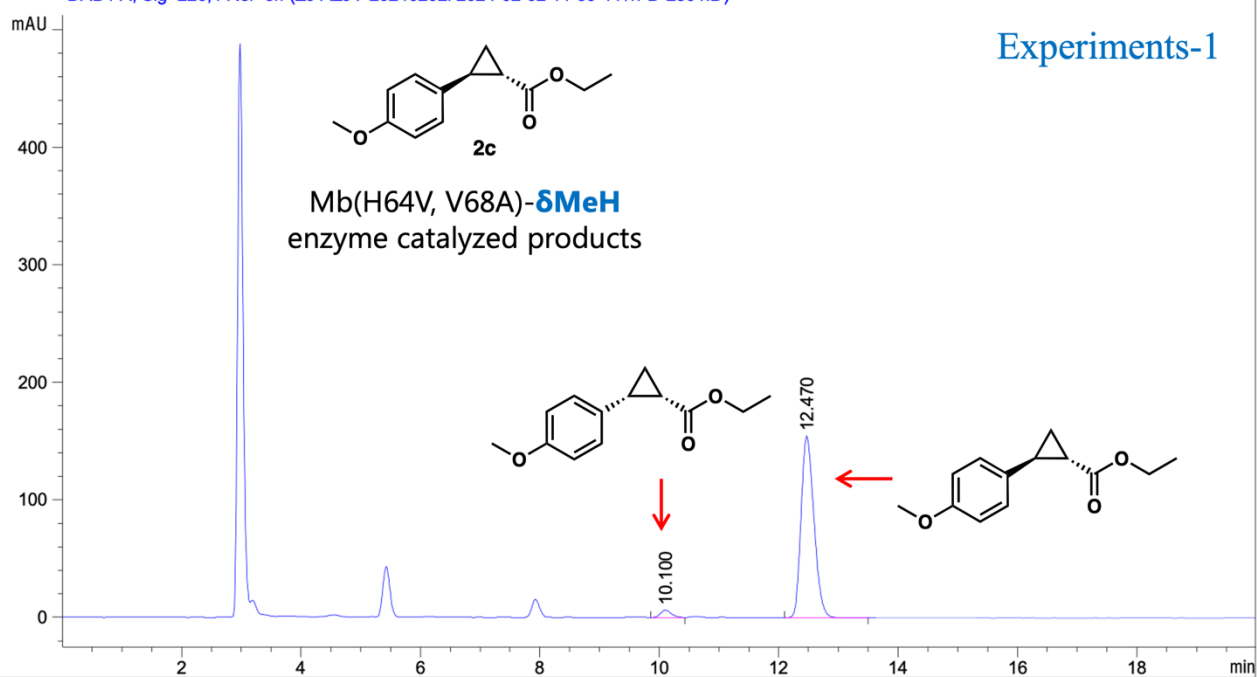

| Peak # | RetTime [min] | Type | Width [min] | Area [mAU*s] | Height [mAU] | Area %  |
|--------|---------------|------|-------------|--------------|--------------|---------|
| 1      | 10.100        | BV   | 0.1944      | 78.81776     | 6.28301      | 3.2896  |
| 2      | 12.470        | BB   | 0.2310      | 2317.17480   | 154.44563    | 96.7104 |

## Experiments-2

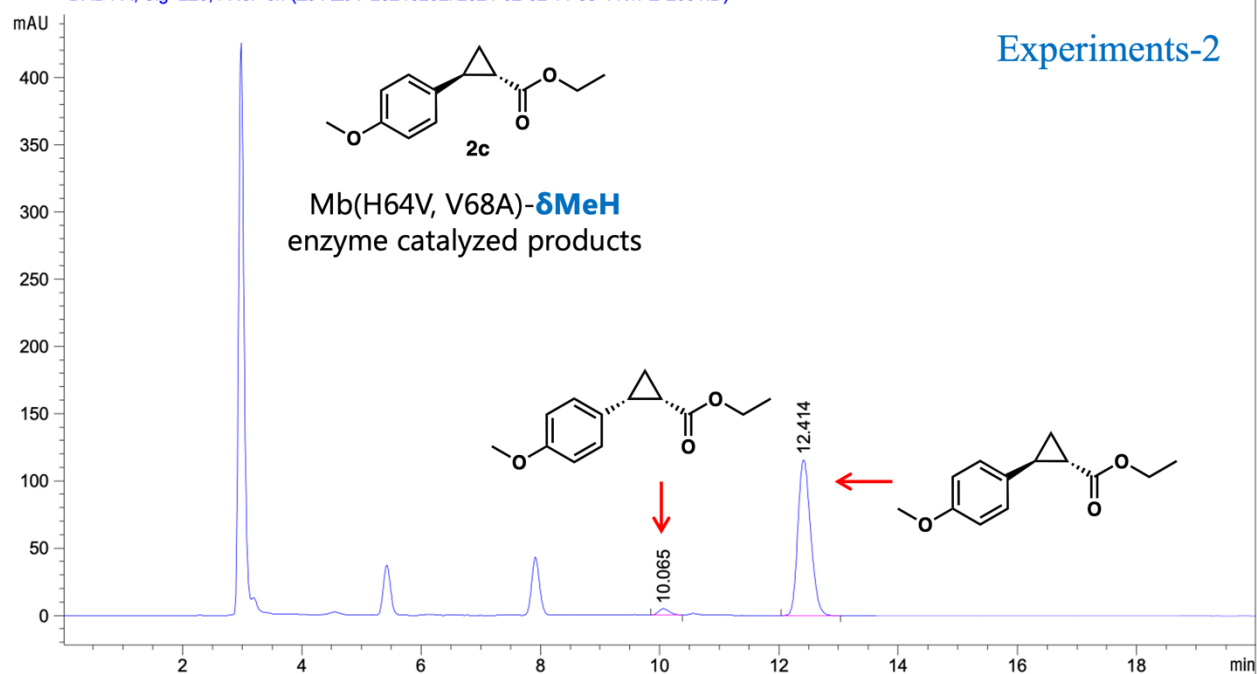

| Peak # | RetTime [min] | Type | Width [min] | Area [mAU*s] | Height [mAU] | Area %  |
|--------|---------------|------|-------------|--------------|--------------|---------|
| 1      | 10.065        | BV   | 0.1893      | 58.61205     | 4.70679      | 3.2835  |
| 2      | 12.414        | BB   | 0.2297      | 1726.40991   | 115.98012    | 96.7165 |

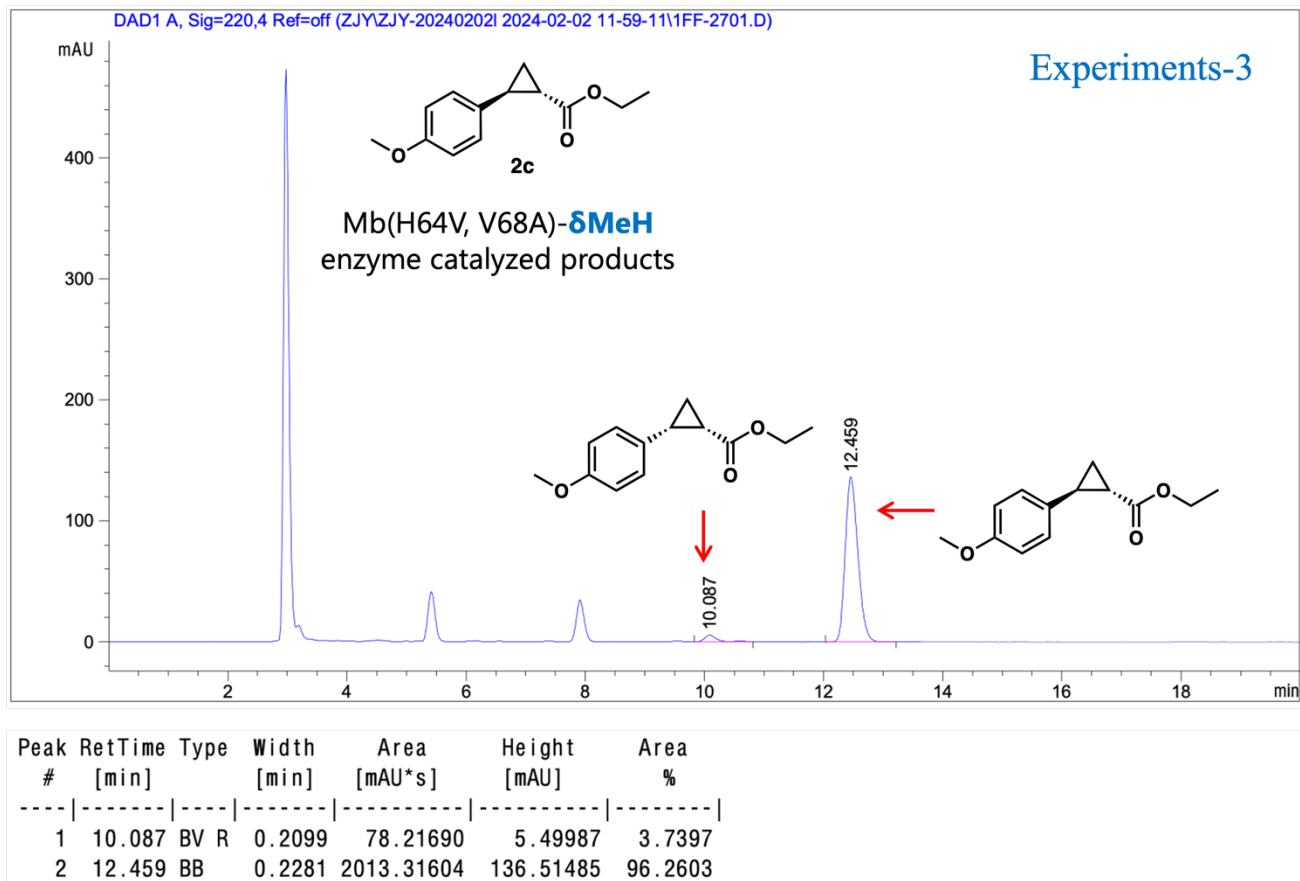

Supplementary Figure 47: chiral HPLC spectrum for **1c**(Mb\*- $\delta$ MeH catalyzed product).

## Experiments-1

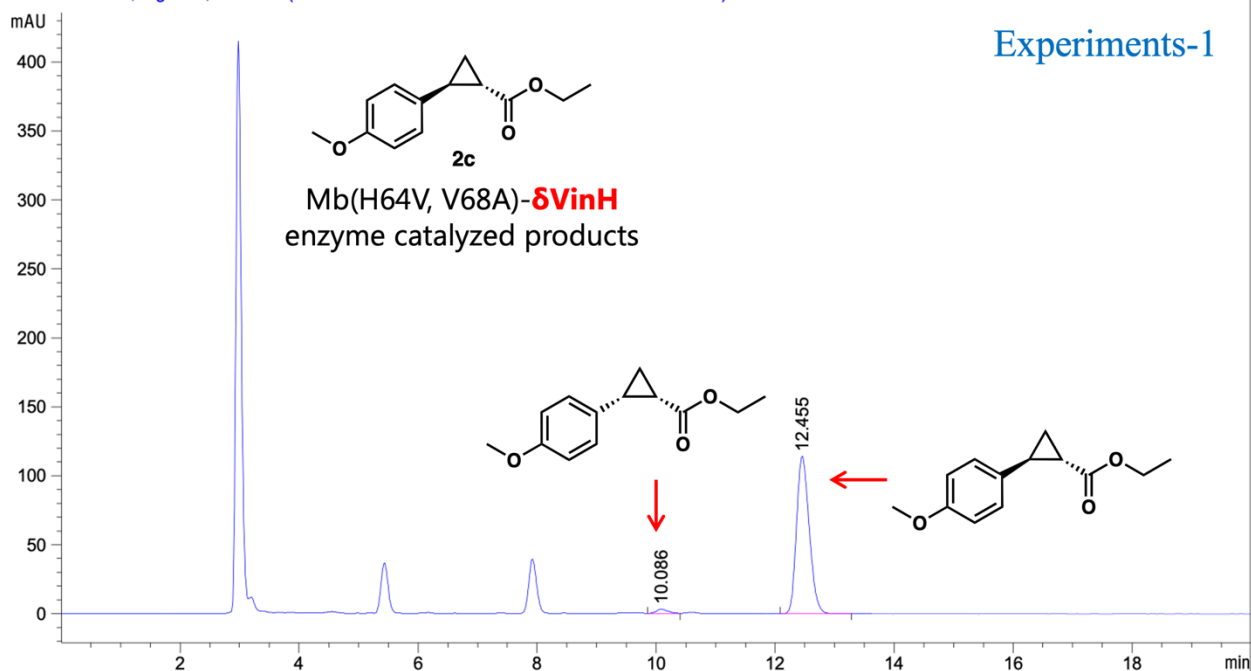

| Peak # | RetTime [min] | Type | Width [min] | Area [mAU*s] | Height [mAU] | Area %  |
|--------|---------------|------|-------------|--------------|--------------|---------|
| 1      | 10.086        | BB   | 0.2046      | 38.07755     | 2.91062      | 2.1971  |
| 2      | 12.455        | BB   | 0.2330      | 1695.02661   | 114.30685    | 97.8029 |

## Experiments-2

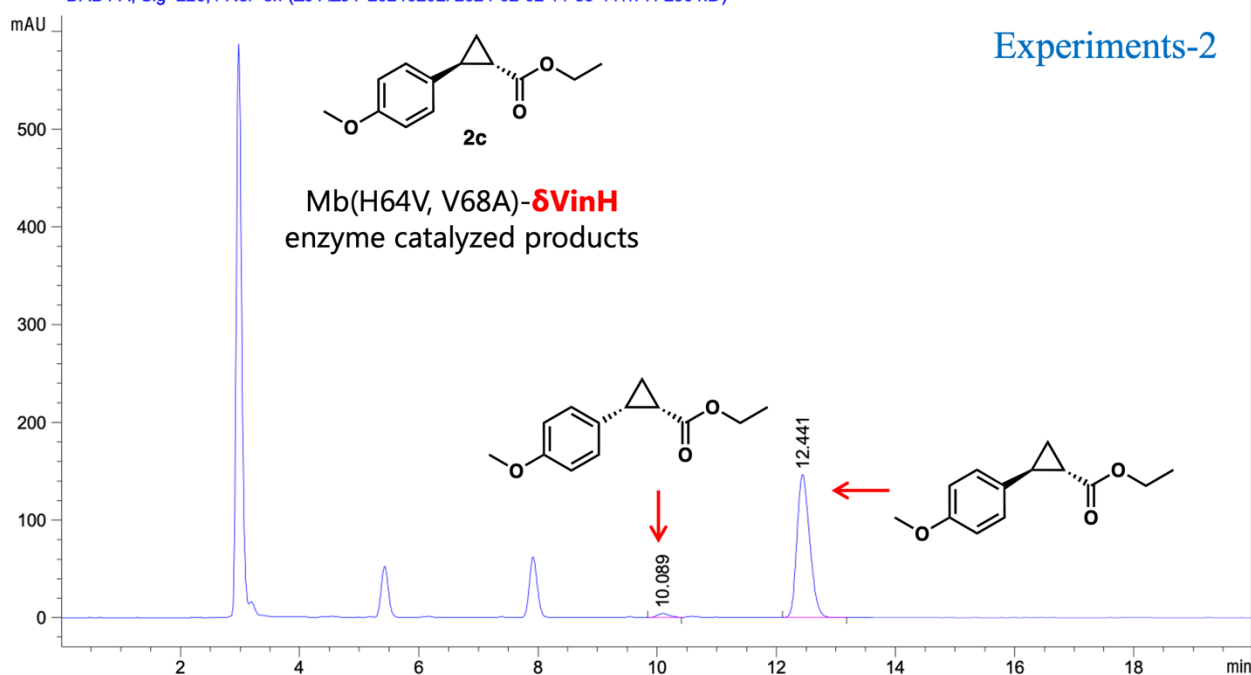

| Peak # | RetTime [min] | Type | Width [min] | Area [mAU*s] | Height [mAU] | Area %  |
|--------|---------------|------|-------------|--------------|--------------|---------|
| 1      | 10.089        | BV   | 0.2020      | 52.57850     | 3.88321      | 2.3605  |
| 2      | 12.441        | BB   | 0.2296      | 2174.85425   | 146.17529    | 97.6395 |

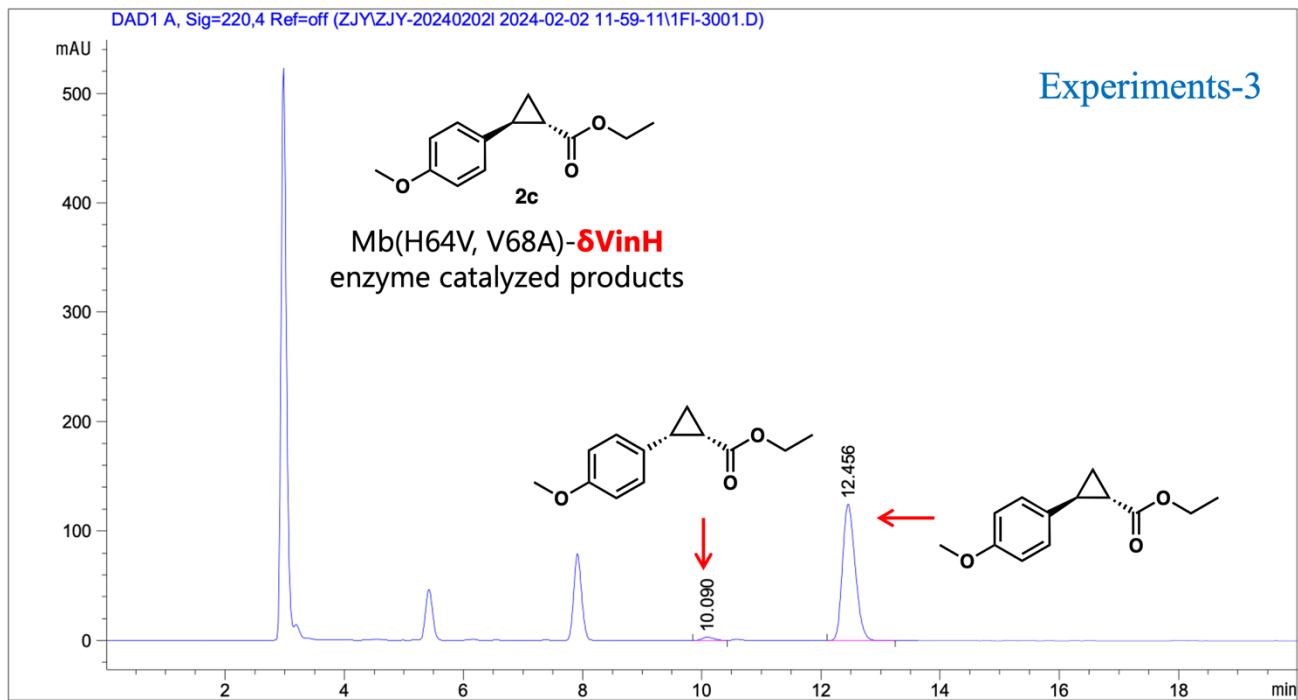

| Peak # | RetTime [min] | Type | Width [min] | Area [mAU*s] | Height [mAU] | Area %  |
|--------|---------------|------|-------------|--------------|--------------|---------|
| 1      | 10.090        | BV   | 0.2110      | 43.64253     | 3.12372      | 2.3018  |
| 2      | 12.456        | BB   | 0.2291      | 1852.40991   | 124.85703    | 97.6982 |

**Supplementary Figure 48:** chiral HPLC spectrum for **2c**(Mb\*- $\delta$ VinH catalyzed product).

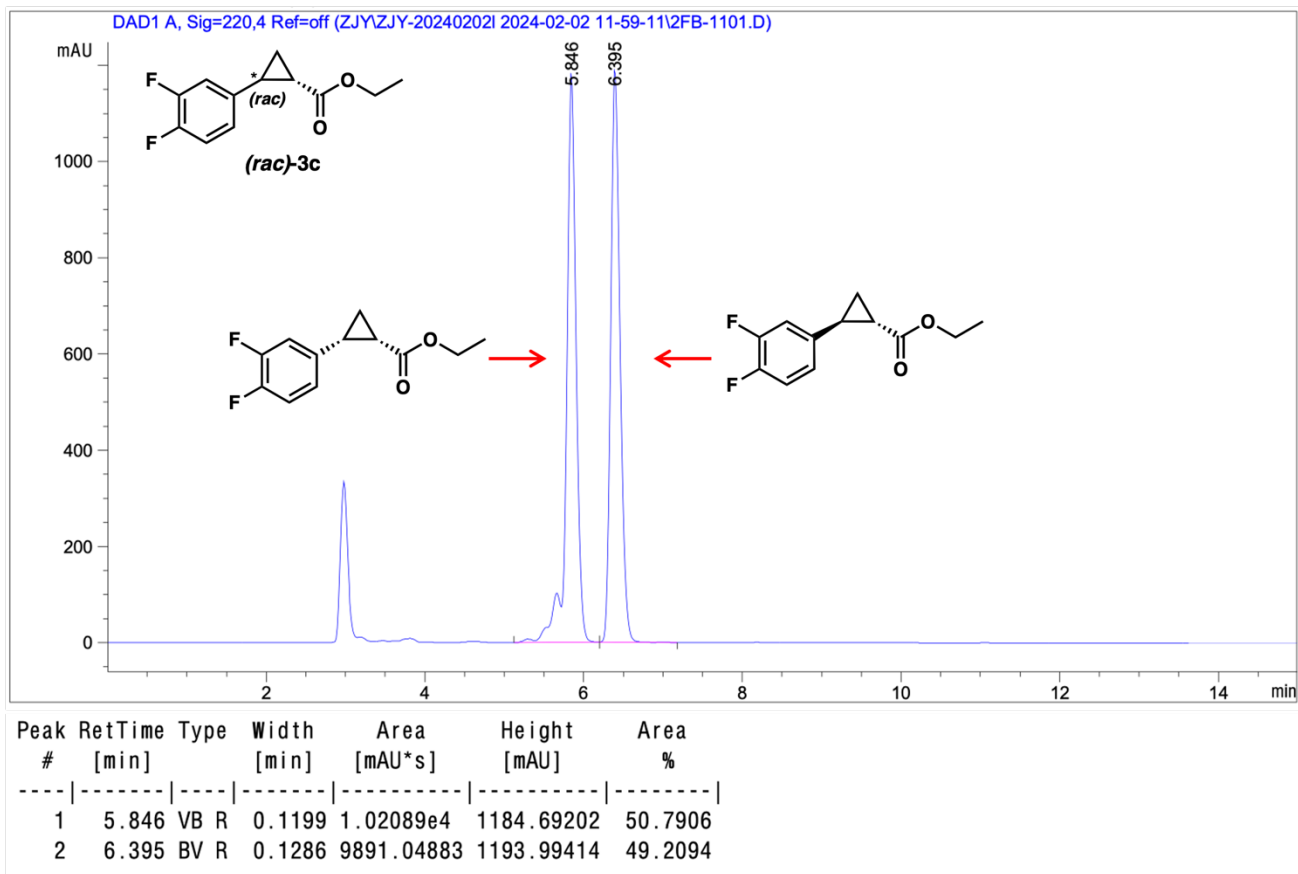

Supplementary Figure 49: chiral HPLC spectrum for *(rac)*-3c.

## Experiments-1

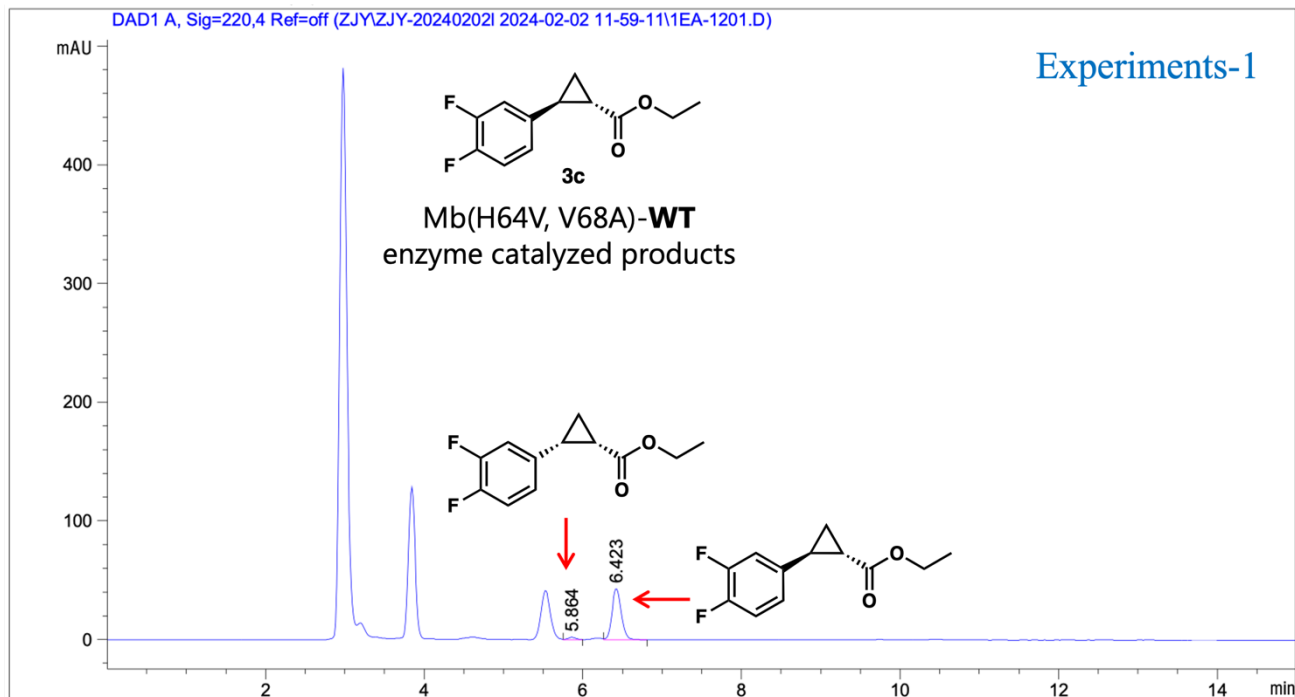

| Peak # | RetTime [min] | Type | Width [min] | Area [mAU*s] | Height [mAU] | Area %  |
|--------|---------------|------|-------------|--------------|--------------|---------|
| 1      | 5.864         | FM R | 0.1293      | 15.73533     | 2.02899      | 4.1965  |
| 2      | 6.423         | FM R | 0.1375      | 359.23148    | 43.55051     | 95.8035 |

## Experiments-2

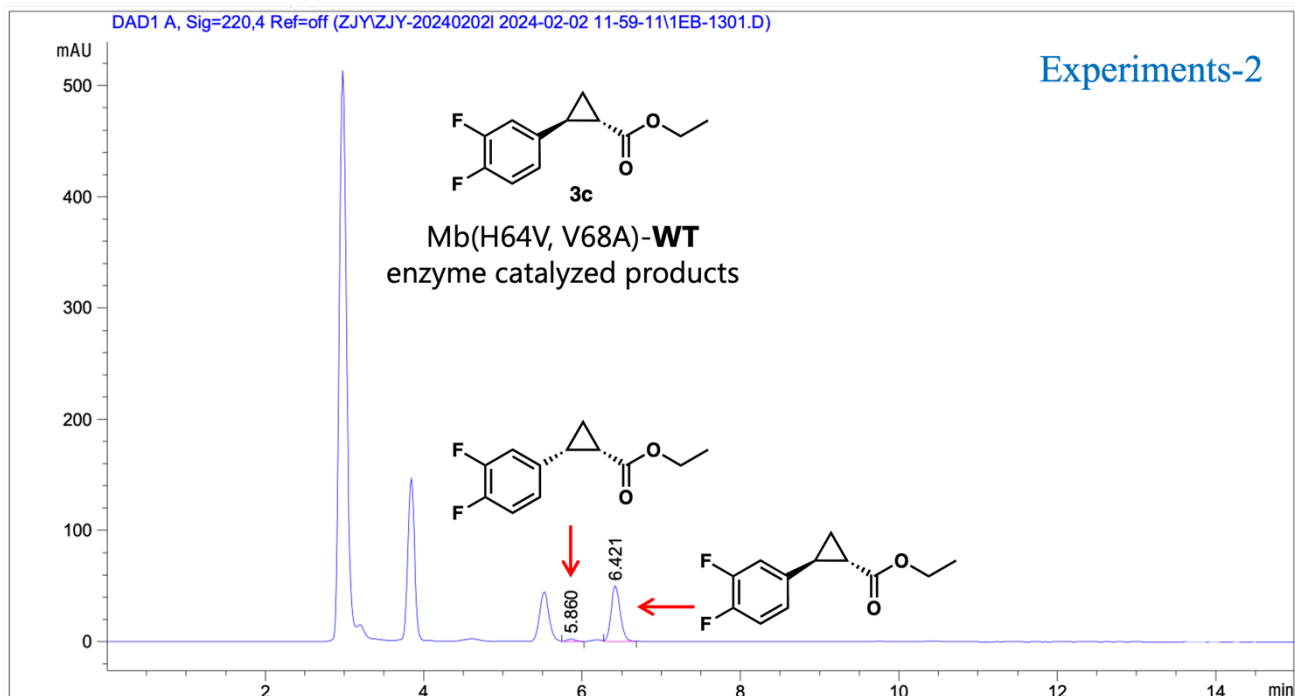

| Peak # | RetTime [min] | Type | Width [min] | Area [mAU*s] | Height [mAU] | Area %  |
|--------|---------------|------|-------------|--------------|--------------|---------|
| 1      | 5.860         | FM R | 0.1359      | 18.68946     | 2.29235      | 4.4046  |
| 2      | 6.421         | FM R | 0.1346      | 405.62570    | 50.23064     | 95.5954 |



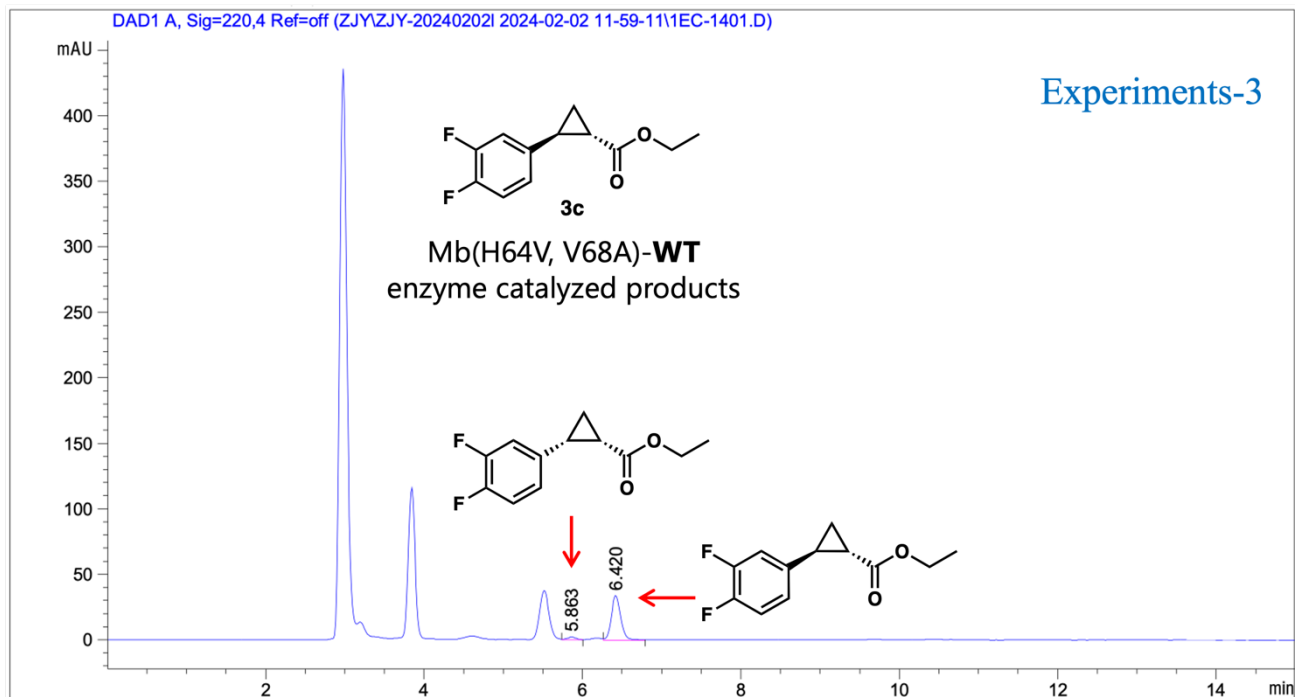

| Peak # | RetTime [min] | Type | Width [min] | Area [mAU*s] | Height [mAU] | Area %  |
|--------|---------------|------|-------------|--------------|--------------|---------|
| 1      | 5.863         | FM R | 0.1307      | 15.77081     | 2.01102      | 5.1980  |
| 2      | 6.420         | FM R | 0.1394      | 287.63278    | 34.39794     | 94.8020 |

Supplementary Figure 50: chiral HPLC spectrum for 3c(Mb\*-WT catalyzed product).

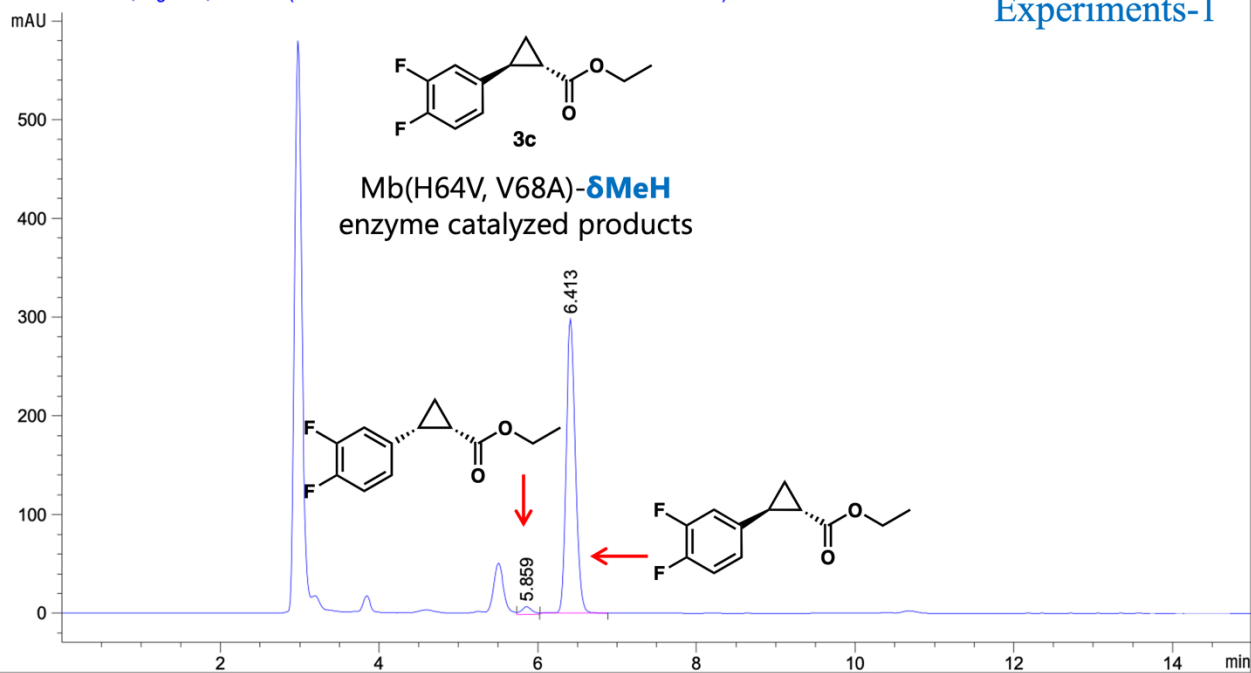

| Peak # | RetTime [min] | Type | Width [min] | Area [mAU*s] | Height [mAU] | Area %  |
|--------|---------------|------|-------------|--------------|--------------|---------|
| 1      | 5.859         | FM R | 0.1489      | 70.69524     | 7.91060      | 2.8467  |
| 2      | 6.413         | BB   | 0.1265      | 2412.72388   | 297.82269    | 97.1533 |

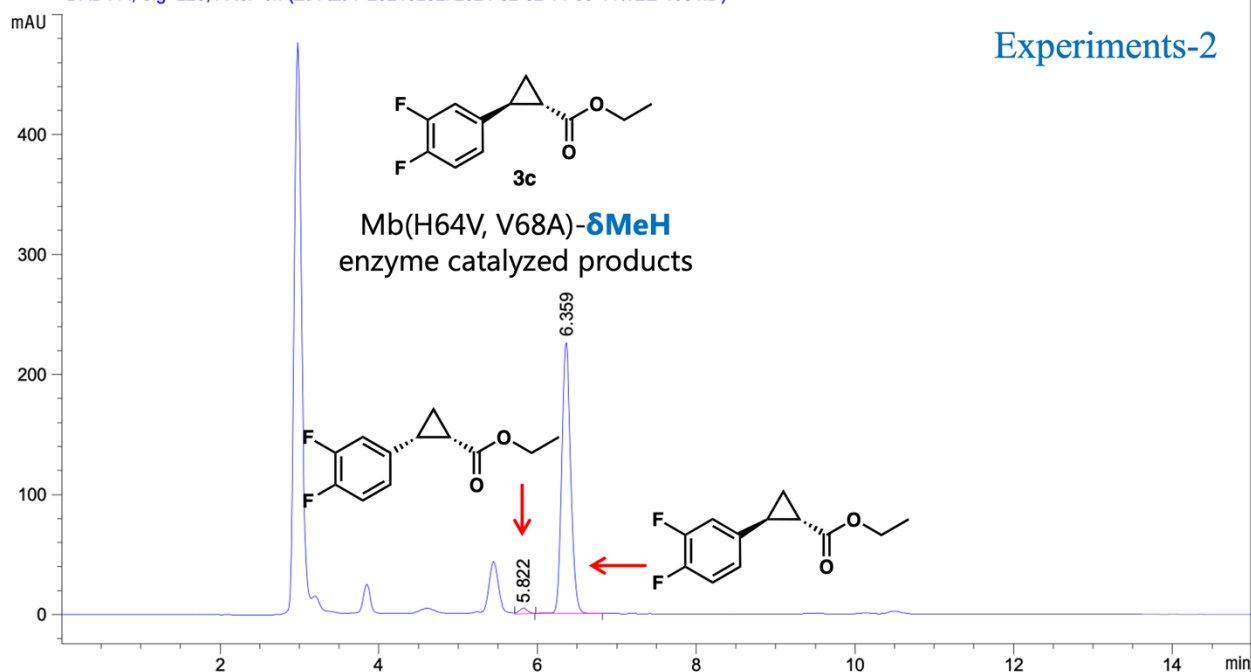

| Peak # | RetTime [min] | Type | Width [min] | Area [mAU*s] | Height [mAU] | Area %  |
|--------|---------------|------|-------------|--------------|--------------|---------|
| 1      | 5.822         | MM R | 0.1231      | 34.25836     | 4.63669      | 1.8515  |
| 2      | 6.359         | VB   | 0.1253      | 1816.07996   | 226.97520    | 98.1485 |

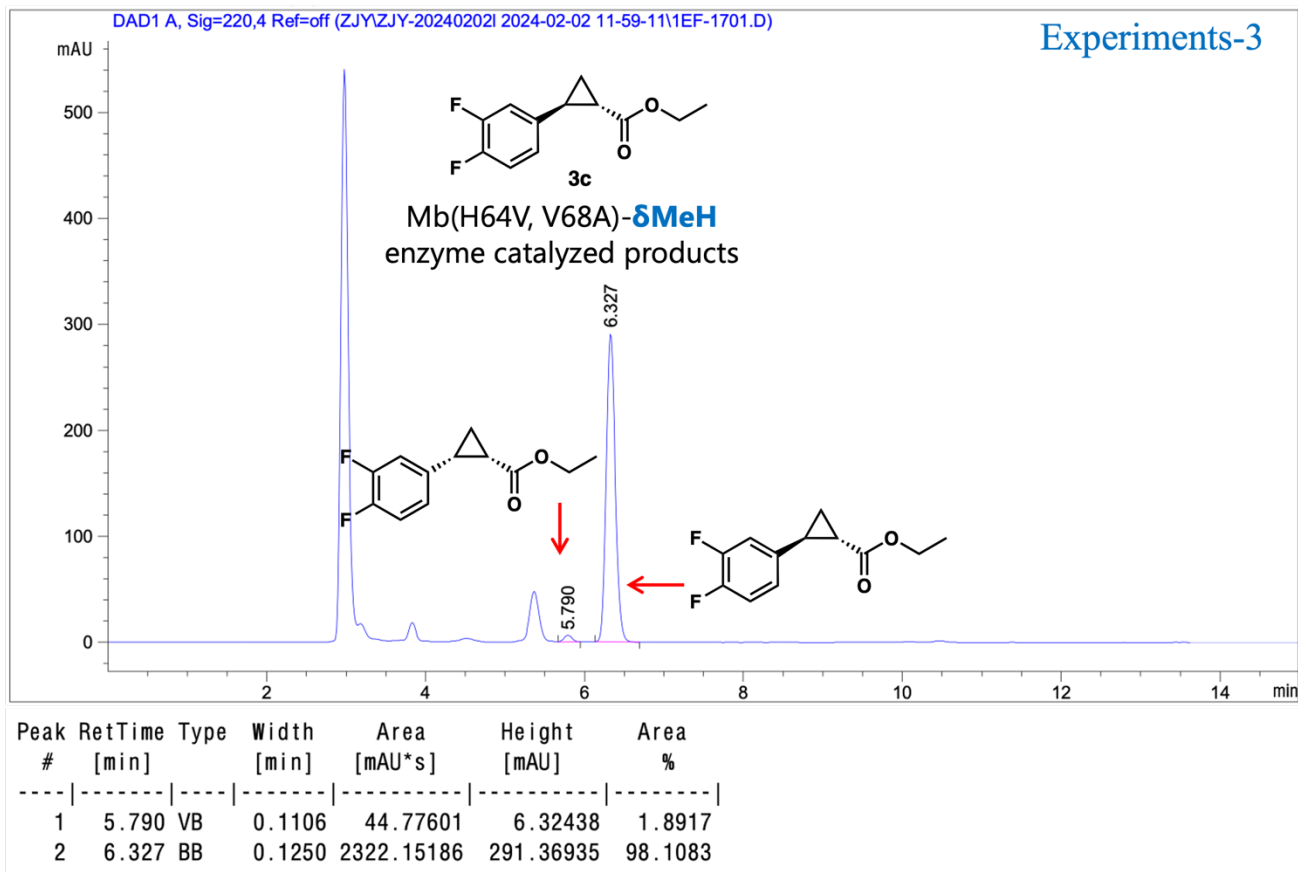

Supplementary Figure 51: chiral HPLC spectrum for 3c(Mb\* $\delta$ MeH catalyzed product).

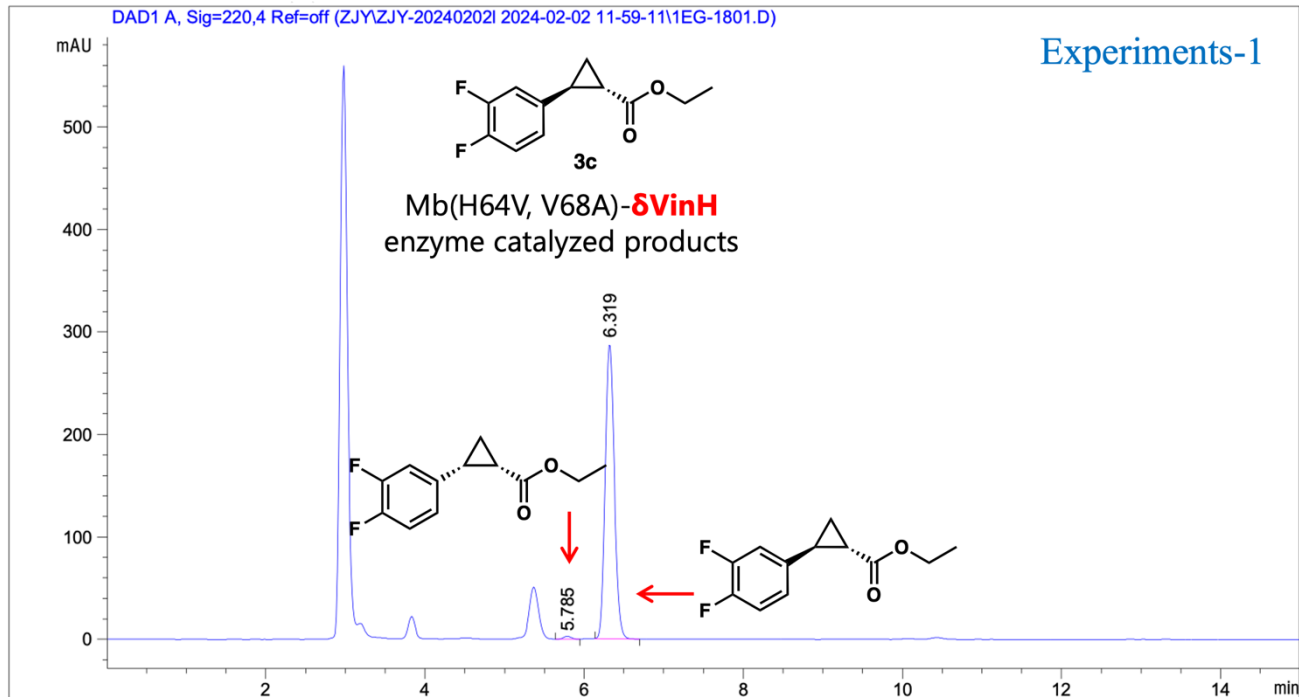

| Peak # | RetTime [min] | Type | Width [min] | Area [mAU*s] | Height [mAU] | Area %  |
|--------|---------------|------|-------------|--------------|--------------|---------|
| 1      | 5.785         | MM R | 0.1272      | 22.56845     | 2.95628      | 0.9730  |
| 2      | 6.319         | MM R | 0.1324      | 2296.98755   | 289.08282    | 99.0270 |

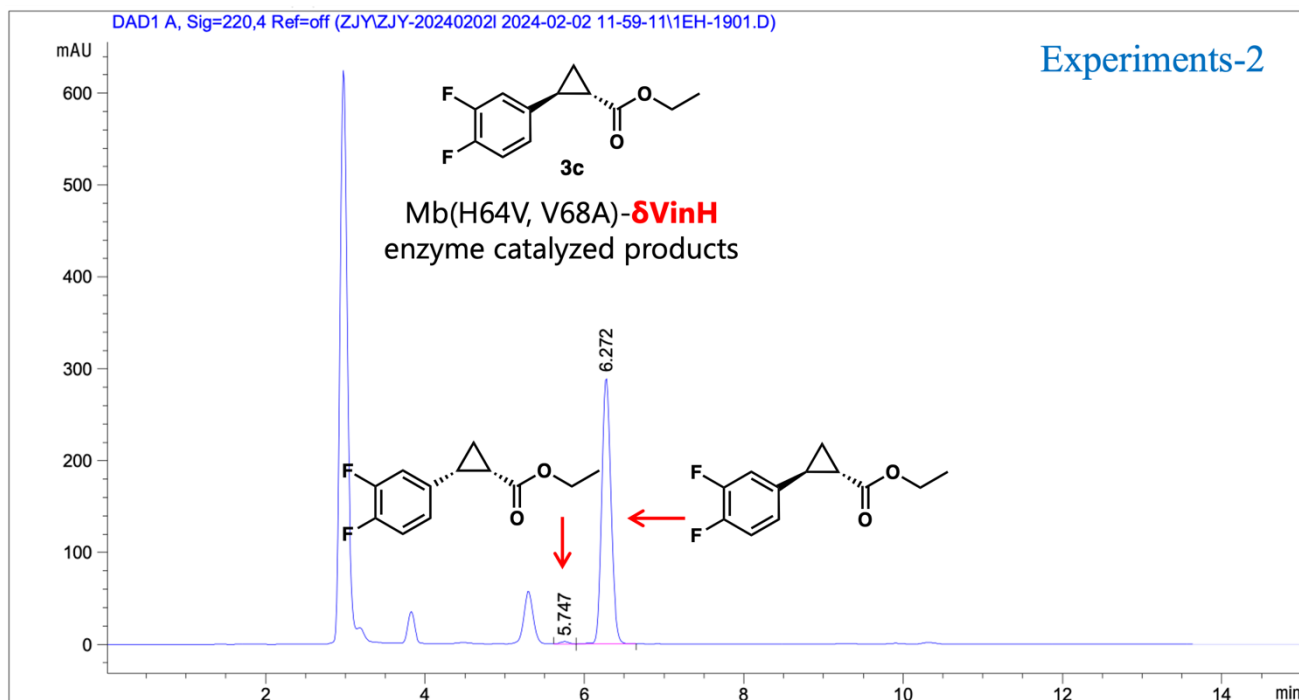

| Peak # | RetTime [min] | Type | Width [min] | Area [mAU*s] | Height [mAU] | Area %  |
|--------|---------------|------|-------------|--------------|--------------|---------|
| 1      | 5.747         | VV   | 0.1123      | 18.35921     | 2.53950      | 0.7894  |
| 2      | 6.272         | VB   | 0.1248      | 2307.26440   | 289.97260    | 99.2106 |

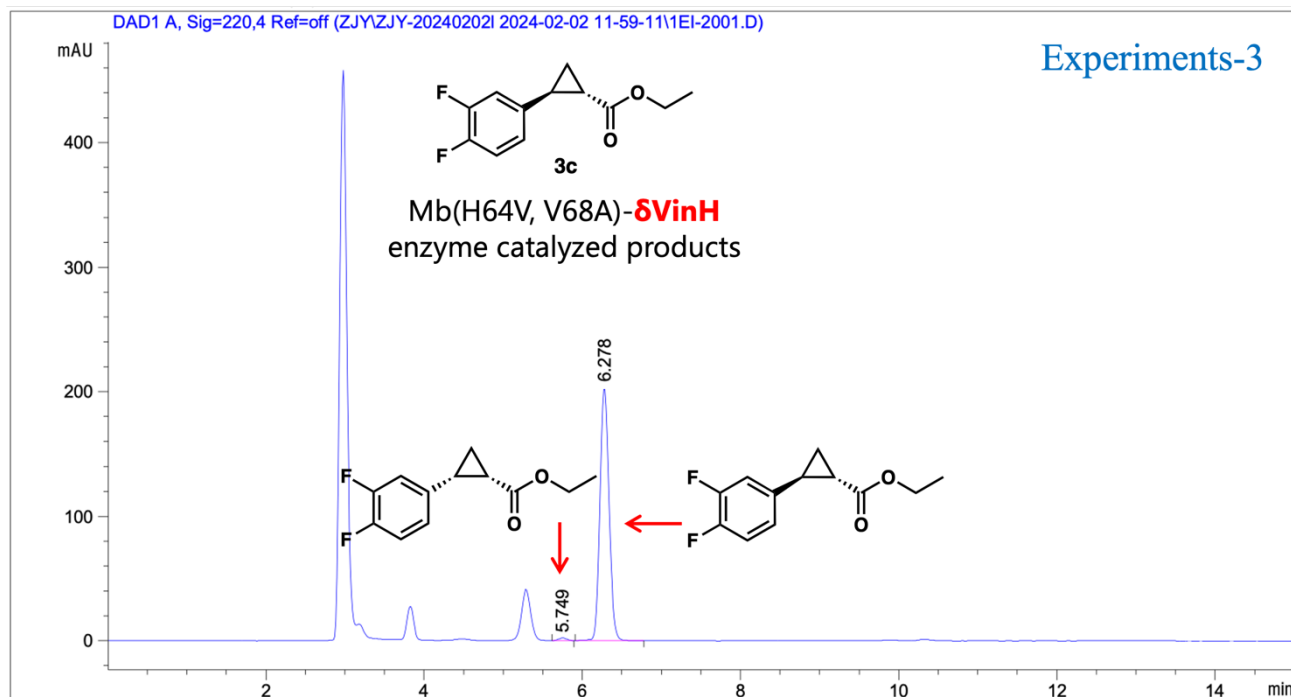

| Peak # | RetTime [min] | Type | Width [min] | Area [mAU*s] | Height [mAU] | Area %  |
|--------|---------------|------|-------------|--------------|--------------|---------|
| 1      | 5.749         | VB   | 0.1095      | 14.08630     | 2.01677      | 0.8676  |
| 2      | 6.278         | BB   | 0.1244      | 1609.44141   | 203.26932    | 99.1324 |

**Supplementary Figure 52:** chiral HPLC spectrum for **3c**(Mb\*- $\delta$ VinH catalyzed product).

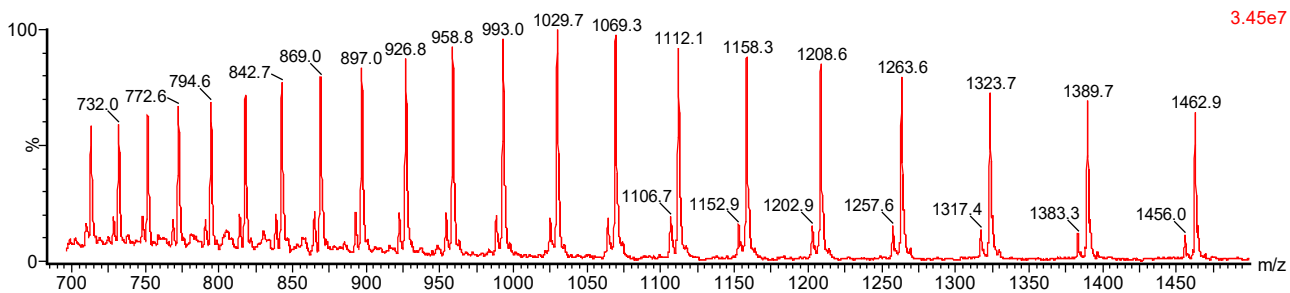

**Supplementary Figure 53:** MS result before deconvolution: GFP-D190- $\delta$ VinH.

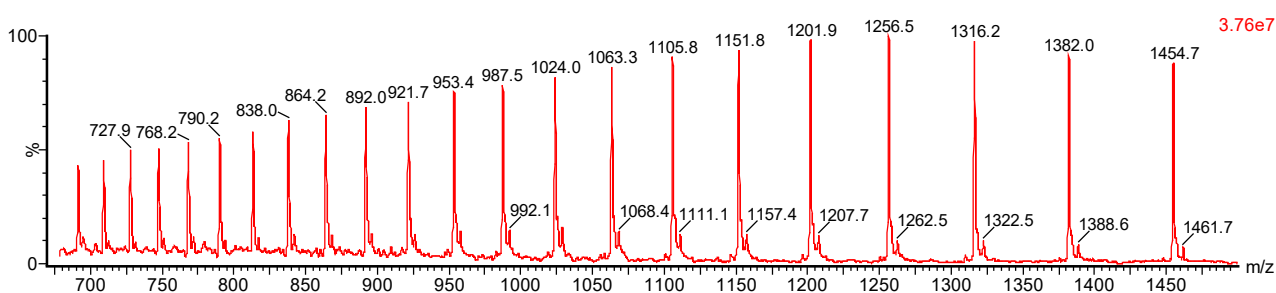

**Supplementary Figure 54:** MS result before deconvolution: OE1.3-H23- $\delta$ VinH.

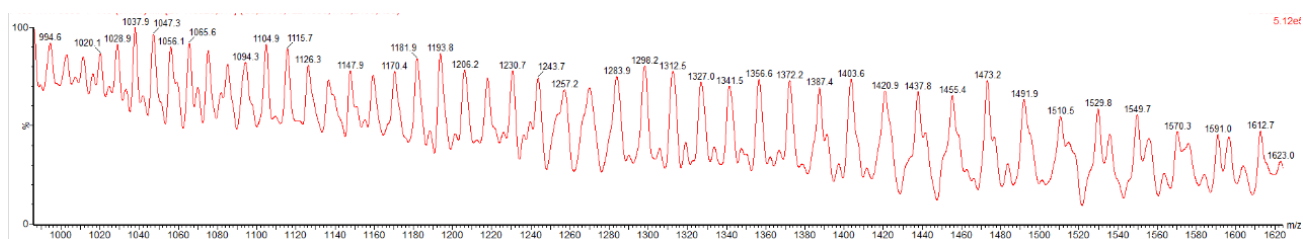

**Supplementary Figure 55:** MS result before deconvolution: P450-H400- $\delta$ VinH.

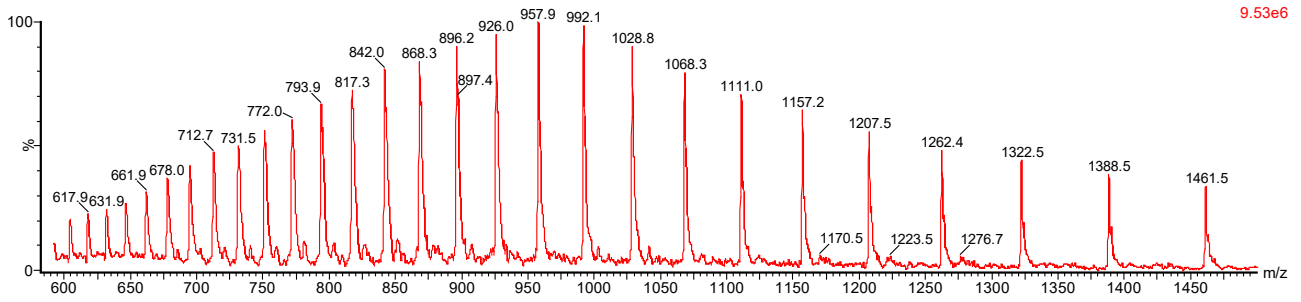

Supplementary Figure 56: MS result before deconvolution: APEX-H163- $\delta$ VinH.

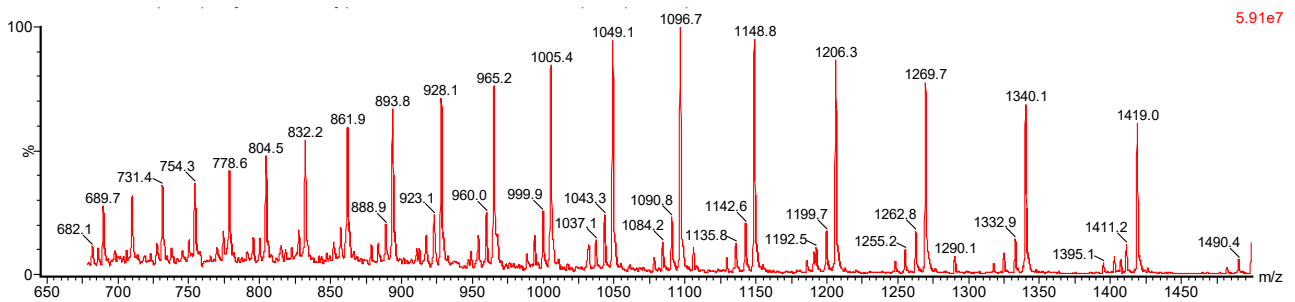

Supplementary Figure 57 MS result before deconvolution: dnHEM1.2- $\delta$ VinH.

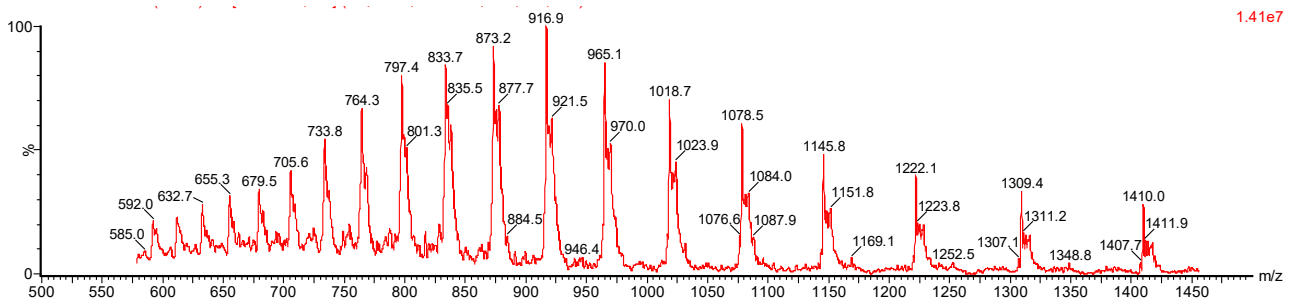

Supplementary Figure 58: MS result before deconvolution: Mb-H93- $\delta$ VinH.

## Supplementary Tables (1-6)

**Supplementary Table 1:** Summary of the extinction coefficients of the different myoglobin variants.

| Variants                | Wavelength Soret band in nm | $\epsilon(\text{Soret})$ in $\text{mM}^{-1} \text{cm}^{-1}$ |
|-------------------------|-----------------------------|-------------------------------------------------------------|
| Mb*-WT                  | 412                         | 135.12 $\pm$ 1.30                                           |
| Mb*-H93- $\delta$ Me-H  | 412                         | 134.93 $\pm$ 6.57                                           |
| Mb*-H93- $\delta$ Vin-H | 412                         | 130.22 $\pm$ 2.56                                           |



**Supplementary Table 2:** Heme loading efficiencies of Mb\* variants.

| Name                    | Heme loading in % |
|-------------------------|-------------------|
| Mb*-WT                  | 46.1±2.2          |
| Mb*-H93- $\delta$ Vin-H | 40.7±2.6          |
| Mb*-H93- $\delta$ Me-H  | 35.7±3.1          |

**Supplementary Table 3:** Summary of enantiomeric excess (ee) percent for Mb variants catalyzed cyclopropanation of styrene

|                                                                                                | Mb variants               | ee %       |
|------------------------------------------------------------------------------------------------|---------------------------|------------|
| 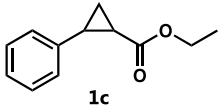<br><b>1c</b> | Mb(H64V, V68A)-WT         | 90±1.1% ee |
|                                                                                                | Mb(H64V, V68A)-H93-δVin-H | 96±0.9% ee |
|                                                                                                | Mb(H64V, V68A)-H93-δMe-H  | 97±1.4% ee |
| <br><b>2c</b> | Mb(H64V, V68A)-WT         | 95±0.5% ee |
|                                                                                                | Mb(H64V, V68A)-H93-δVin-H | 93±0.5% ee |
|                                                                                                | Mb(H64V, V68A)-H93-δMe-H  | 95±0.2% ee |
| <br><b>3c</b> | Mb(H64V, V68A)-WT         | 91±1.1% ee |
|                                                                                                | Mb(H64V, V68A)-H93-δVin-H | 95±1.1% ee |
|                                                                                                | Mb(H64V, V68A)-H93-δMe-H  | 98±0.2% ee |

**Supplementary Table 4:** The cycloaddition reaction catalyzed by Mb(H64V, V68A)-H93- $\delta$ VinH.

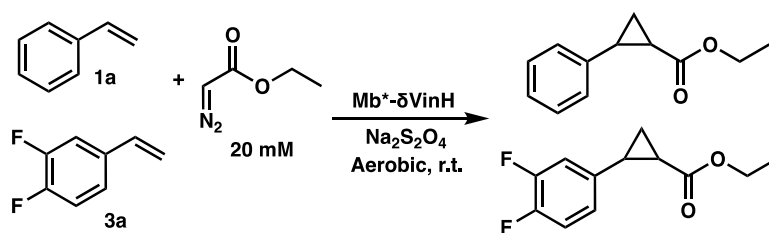

| Entry | Substrate (mM) | Na <sub>2</sub> S <sub>2</sub> O <sub>4</sub> (mM) | Cat. (mol%) | Time (min) | Conversion (%) |
|-------|----------------|----------------------------------------------------|-------------|------------|----------------|
| 1     | 1a             | 10                                                 | 0.1         | 5          | 77.1           |
| 2     | 1a             | 20                                                 | 0.1         | 5          | 76.1           |
| 3     | 1a             | 50                                                 | 0.1         | 5          | 72.0           |
| 4     | 1a             | 100                                                | 0.1         | 5          | 78.4           |
| 5     | 1a             | 10                                                 | 0.05        | 5          | 55.2           |
| 6     | 1a             | 10                                                 | 0.02        | 5          | 26.6           |
| 7     | 3a             | 10                                                 | 0.1         | 60         | 79.5           |
| 8     | 3a             | 10                                                 | 0.1         | 30         | 76.8           |
| 9     | 3a             | 10                                                 | 0.1         | 5          | 78.5           |

**Supplementary Table 5:** Cartesian coordinates (Å) for the DFT-optimized structures:

**Imidazole**

C -0.64590000 0.06870000 0.00000000  
C 0.21600000 1.13840000 0.00000000  
C 1.47130000 -0.60140000 0.00000000  
N 0.17930000 -1.03860000 -0.00010000  
H -0.12220000 -2.00150000 0.00050000  
H 2.30960000 -1.28060000 -0.00020000  
N 1.53270000 0.71370000 0.00000000  
C -2.13360000 -0.02310000 0.00000000  
H -2.50510000 -0.55190000 0.88300000  
H -2.56510000 0.97840000 -0.00020000  
H -2.50490000 -0.55220000 -0.88290000  
H -0.04210000 2.18660000 0.00010000

**N-methylimidazole**

C 0.28743300 -0.70240400 0.00014100  
C -0.98837500 -1.21471500 -0.00008400  
C -1.22384400 0.91402300 0.00005600  
N 0.11968800 0.67167100 0.00025600  
H -1.61918600 1.91857500 0.00017100  
N -1.92591100 -0.20087200 -0.00011500  
C 1.62579500 -1.35707100 -0.00000100  
H 2.21381900 -1.08457900 0.88219700  
H 1.50270700 -2.44053500 0.00013400  
H 2.21343500 -1.08478700 -0.88254100  
H -1.27531300 -2.25563200 -0.00008400  
C 1.17840600 1.66984300 -0.00013700  
H 1.80352000 1.56679800 0.88834600  
H 1.80274100 1.56691300 -0.88918700  
H 0.72534400 2.65960400 0.00013400

### **N-vinyl-imidazole**

C 0.91528800 0.53788800 -0.00528600  
C 1.82970000 -0.48030700 -0.03476100  
C -0.08281500 -1.45058700 0.04248600  
H -0.87740000 -2.17717100 0.09241700  
N 1.20022900 -1.71393000 -0.00179000  
C 1.08628400 2.01751000 -0.02440900  
H 0.67704900 2.49003700 0.87379100  
H 2.14960300 2.25393300 -0.07030600  
H 0.60167600 2.47545800 -0.89175800  
H 2.90448400 -0.39276500 -0.07536100  
C -1.57615300 0.55643200 0.07459500  
C -2.76045900 -0.02895400 -0.08088500  
H -1.49577900 1.62122800 0.24789800  
H -3.65838300 0.56967800 -0.01539700  
H -2.87815400 -1.08805500 -0.27017400  
N -0.32796700 -0.09524600 0.04156800

Supplementary Table 6: DNA sequence and protein sequence in this paper

The incorporation sites of UAA are highlighted in yellow.

|                                    |                                                                                                                                                                                                                                                                                                                                                                                                                                                                                                                                                                                                                                                                                                                                                                                                                                                                                                                                                                                                                                                                                                                                                                                                                                                                                                                           |
|------------------------------------|---------------------------------------------------------------------------------------------------------------------------------------------------------------------------------------------------------------------------------------------------------------------------------------------------------------------------------------------------------------------------------------------------------------------------------------------------------------------------------------------------------------------------------------------------------------------------------------------------------------------------------------------------------------------------------------------------------------------------------------------------------------------------------------------------------------------------------------------------------------------------------------------------------------------------------------------------------------------------------------------------------------------------------------------------------------------------------------------------------------------------------------------------------------------------------------------------------------------------------------------------------------------------------------------------------------------------|
| <p><b>1</b></p>                    | <p><b>chPylRS-IPYE-<math>\delta</math>Me-H</b> “IPYE” mutations (V31I, T56P, H62Y, and A100E) and fixed mutation (Y349F) were labeled in blue.</p>                                                                                                                                                                                                                                                                                                                                                                                                                                                                                                                                                                                                                                                                                                                                                                                                                                                                                                                                                                                                                                                                                                                                                                        |
| <p><b>DNA<br/>sequence</b></p>     | <p>ATGGATAAGAAGCCGCTGGATGTTCTGATCTCTGCGACCGGTCTGTGGATGTCCCGTACCGGCACGCTGCACAAGATCAAGCACTATGAGATTTCTCGTTCTAAAATCTACATCGA AATGGCGTGTGGTGACCATCTGGTTGTGAACAACCTCTCGTTCTTGTCTGCCGCACGT GCATCCGTTATCATAAATACCGTAAAACCTGCAAACGTTGTCTGTTTCTGACGAAG ATATCAACAACCTTCTGACCCGTTCTACCGAAGGCAAAACCTCTGTAAAGTTAAAG TTGTTTCTGAGCCGAAAGTGAAAAAGCGATGCCGAAATCTGTTTCTCGTGCGCCGA AACCGCTGGAAAATCCGGTTTCTGCGAAAGCGTCTACCGACACCTCTCGTTCTGTTT CCGTCTCCGGCGAAATCTACCCCGAACTCTCCGGTTCCGACCTCTGCAAGCGCCCCAG CTCTGACTAAATCCAGACGGACCGTCTGGAGGTGCTGCTGAACCCAAAGGATGAA ATCTCTCTGAACAGCGGCAAGCCTTCCGTGAGCTGGAAAGCGAGCTGCTGTCTCGT CGTAAAAAGGATCTGCAACAGATCTACGCTGAGGAACGCGAGAACTATCTGGGTAAG CTGGAGCGCGAAATACTCGCTTCTTCGTGGATCGCGGTTTCTGGAGATCAAATCTC CGATTCTGATTCCGCTGGAATACATTGAACGTATGGGCATCGATAATGATACCGAACT GTCTAAACAGATCTTCCGTGTGGATAAAAACCTTCTGTCTGCGTCCGATGCTGGCCCCG AACATCTTCAACTATGGTCGTAACCTGGACCGTGCCCTGCCGACCCGATCAAATTT TCGAGATCGGTCCCTTGCTACCGTAAAGAGTCCGACGGTAAAGAGCACCTGGAAGAAT TCACCATGCTGAACCTTCCAGATGGGTAGCGGTTGCACGCGTGAACCTGGAAT CCATTATCACCGACTTCTTGAATCACCTGGGTATCGATTTCAAATTTGTTGGTGACAG CTGTATGGTGTGGCGATACGCTGGATGTTATGCACGGCGATCTGGAGCTGTCTTCC GCAGTAGTGGGCCAATCCCGCTGGATCGTGAGTGGGGTATCGACAAACCTTGGATC GGTGCGGGTTTTGGTCTGGAGCGTCTGCTGAAAGTAAAACACGACTTCAAGAACATC AAACGTGCTGCACGTTCCGAGTCCTATTACAATGGTATTTCTACTAACCTGTAA</p> |
| <p><b>Protein<br/>Sequence</b></p> | <p>MDKKPLDVLISATGLWMSRTGTLHKIKHYEISRSKIYIEMACGDHLVNNNSRSCRPARAF RYHKYRKTCRRCRVSDIEDINNFLRSTEGKTSVKVQVSEPKVKKAMPKSVSRAPKPLE NPVSAKASTDTSRSVPSPAKSTPNSPVPTSASAPALTKSQDRLEVLLNPKDEISLNSGKP FRELESELLSRRKKDLQIQIYAERENYLGKLEREITRFFVDRGFLEIKSPILIPLEYIERMGI DNDTELSKQIFRVDKNFCLRPMLAPNIFNYGRKLDRALPDPIKIFEIGPCYRKESDGKEHL EEFTMLNFFQMMSGCTRENLESIITDFLNHLGIDFKIVGDSMVFVGDVLDVMHGDLELSS AVVGPIPLDREWIDKPKWIGAGFGLERLLKVKHDFKNIKRAARSESYYNGISTNL*</p>                                                                                                                                                                                                                                                                                                                                                                                                                                                                                                                                                                                                                                                                                                                                                                                                                                                                           |

|                                    |                                                                                                                                                                                                                                                                                                                                                                                                                                                                                                                                                                                                                                                                                                                                                                                                                                                                                                                                                                                                                                                                                                                                                                                                                                                                                                                                |
|------------------------------------|--------------------------------------------------------------------------------------------------------------------------------------------------------------------------------------------------------------------------------------------------------------------------------------------------------------------------------------------------------------------------------------------------------------------------------------------------------------------------------------------------------------------------------------------------------------------------------------------------------------------------------------------------------------------------------------------------------------------------------------------------------------------------------------------------------------------------------------------------------------------------------------------------------------------------------------------------------------------------------------------------------------------------------------------------------------------------------------------------------------------------------------------------------------------------------------------------------------------------------------------------------------------------------------------------------------------------------|
| 2                                  | <p><b>chPylRS-IPYE-<math>\delta</math>Vin-H</b> “IPYE” mutations (V31I, T56P, H62Y, and A100E) and fixed mutation (Y349F) were labeled in blue, and the mutations selected from the evolution were labeled in red.</p>                                                                                                                                                                                                                                                                                                                                                                                                                                                                                                                                                                                                                                                                                                                                                                                                                                                                                                                                                                                                                                                                                                         |
| <p><b>DNA<br/>sequence</b></p>     | <p>ATGGATAAGAAGCCGCTGGATGTTCTGATCTCTGCGACCGGTCTGTGGATGTCCCGTACCGGCACGCTGCACAAGATCAAGCACTATGAGATTTCTCGTTCTAAAATCTACATCGA AATGGCGTGTGGTGACCATCTGGTTGTGAACAACCTCTCGTTCTTGTCTGTCGTCACG TGCATTCCGTTATCATAAATACCGTAAAACCTGCAAACGTTGTCGTGTTTCTGACGAA GATATCAACAACCTTCCTGACCCGTTCTACCGAAGGCAAACCTCTGTAAAGTTAAA GTTGTCTCTGAGCCGAAAGTGAAAAAGCGATGCCGAAATCTGTTTCTCGTGCGCCG AAACCGCTGGAAAATCCGGTTTCTGCGAAAGCGTCTACCGACACCTCTCGTTCTGTT CCGTCTCCGGCGAAATCTACCCCGAACTCTCCGGTCCGACCTCTGCAAGCGCCCCA GCTCTGACTAAATCCCAGACGGACCGTCTGGAGGTGCTGCTGAACCCAAAGGATGA AATCTCTCTGAACAGCGGCAAGCCTTCCGTGAGCTGGAAAGCGAGCTGCTGTCTCG TCGTAAAAAGGATCTGCAACAGATCTACGCTGAGGAACGCGAGA ACTATCTGGGTAA GCTGGAGCGCGAAATACTCGTTCTTCGTGGATCGCGGTTTCTGGAGATCAAATCT CCGATTCTGATTCCGCTGGAATACATTGAACGTATGGGCATCGATAATGATAACCGAAC TGCTAAACAGATCTTCCGTGTGGATAAAAACCTTCTGTCTGCGTCCGATGCTGGCCCC GAACATGTTGAACTATCTTCGTAAACTGGACCGTGCCCTGCCGGACCCGATCAAAAT TTTCGAGATCGGTCCTTGCTACCGTAAAGAGTCCGACGGTAAAGAGCACCTGGAAGA ATTCACCATGCTGGATTTCAAGCAGATGGGTAGCGGTTGCACGCGTGAAAACCTGGA ATCCATTATCACCGACTTCCTGAATCACCTGGGTATCGATTTCAAATGTTGGTGACA GCTGTATGGTGTGGCGATACGCTGGATGTTATGCACGGCGATCTGGAGCTGTCTTC CGCAGTAGTGGGCCAATCCCGCTGGATCGTGAGTGGGGTATCGACAAACCTTGGAT CCGTGCGGGTTTTGGTCTGGAGCGTCTGCTGAAAGTAAAACACGACTTCAAGAACA TCAAACGTGCTGCACGTTCCGAGTCCTATTACAATGGTATTTCTACTAACCTGTAA</p> |
| <p><b>Protein<br/>Sequence</b></p> | <p>MDKKPLDVLISATGLWMSRTGTLHKIKHYEISRSKIYIEMACGDHLVVNNSRSCRPARAF RYHKYRKTCKRCRVSDINFLRSTEGKTSVKVKVVSEPKVKKAMPKSVSRAPKPLE NPVSAKASTDTSRSVPSPAKSTPNPVPPTSASAPALTKSQTDRLVLLNPKDEISLNSGKP FRELESELLSRRKKDLQQIYAEERENYLGKLEREITRFFVDRGFLEIKSPILIPLEYIERMGI DNDTELSKQIFRVDKNFCLRPMLAPNMLNYLRKLDRALPDPIKIFEIGPCYRKESDGKEH LEEFTMLDFKQMSGCTRENLESIITDFLNHLGIDFKIVGDSCMVFGDTLDVMHGDLEL SSAVVGPIPLDREWIDKPKWIGAGFGLERLLKVKHDFKNIKRAARSESYYNGISTNL*</p>                                                                                                                                                                                                                                                                                                                                                                                                                                                                                                                                                                                                                                                                                                                                                                                                                                                                                    |

|                     |                                                                                                                                                                                                                                                                                                                                                                                                                                                                                                                                                                                                                                                                                                                                                                                                                                                                                                                                                                                                                                                                                                                                                                                                                                                                                                                                                                                                                                                                                                                                                                 |
|---------------------|-----------------------------------------------------------------------------------------------------------------------------------------------------------------------------------------------------------------------------------------------------------------------------------------------------------------------------------------------------------------------------------------------------------------------------------------------------------------------------------------------------------------------------------------------------------------------------------------------------------------------------------------------------------------------------------------------------------------------------------------------------------------------------------------------------------------------------------------------------------------------------------------------------------------------------------------------------------------------------------------------------------------------------------------------------------------------------------------------------------------------------------------------------------------------------------------------------------------------------------------------------------------------------------------------------------------------------------------------------------------------------------------------------------------------------------------------------------------------------------------------------------------------------------------------------------------|
| 3                   | <b>Mm-PylRS-<math>\delta</math>Me-H(hit-2) in eukaryotic expression vector:</b>                                                                                                                                                                                                                                                                                                                                                                                                                                                                                                                                                                                                                                                                                                                                                                                                                                                                                                                                                                                                                                                                                                                                                                                                                                                                                                                                                                                                                                                                                 |
| DNA<br>sequence     | <p>ATGGATAAAAAACCACTAAACACTCTGATATCTGCAACCGGGCTCTGGATGTCCAG<br/> GACCGGAACAATTCATAAAATAAAACACCACGAAGTCTCTCGAAGCAAATCTATA<br/> TTGAAATGGCATGCGGAGACCACCTTGTGTAAACAACCTCCAGGAGCAGCAGGAC<br/> TGCAAGAGCGCTCAGGCACCACAAATACAGGAAGACCTGCAAACGCTGCAGGGTT<br/> TCGGATGAGGATCTCAATAAGTTCCTCACAAAGGCAAACGAAGACCAGACAAGCG<br/> TAAAAGTCAAGGTCGTTTCTGCCCTACCAGAACGAAAAAGGCAATGCCAAAATC<br/> CGTTGCGAGAGCCCCGAAACCTCTTGAGAATACAGAAGCGGCACAGGCTCAACCT<br/> TCTGGATCTAAATTTTCACCTGCGATACCGGTTTCCACCCAAGAGTCAGTTTCTGTC<br/> CCGGCATCTGTTTCAACATCAATATCAAGCATTCTACAGGAGCAACTGCATCCGCA<br/> CTGGTAAAAGGGAATACGAACCCCATACATCCATGTCTGCCCTGTTTCAGGCAAG<br/> TGCCCCCGCACTTACGAAGAGCCAGACTGACAGGCTTGAAGTCTGTAAACCCA<br/> AAAGATGAGATTTCCCTGAATTCGGCAAGCCTTTCAGGGAGCTTGAGTCCGAATT<br/> GCTCTCTCGCAGAAAAAAGACCTGCAGCAGATCTACGCGGAAGAAAGGGAGAAT<br/> TATCTGGGGAAACTCGAGCGTGAAATTACCAGGTTCTTTGTGGACAGGGGTTTTCT<br/> GGAAATAAAATCCCCGATCCTGATCCCTCTTGAGTATATCGAAAGGATGGGCATTGA<br/> TAATGATACCGAACTTTCAAACAGATCTTCAGGGTTGACAAGAACTTCTGCCTGA<br/> GACCCATGCTTGCTCAAACATCTTCAACTACGGTCGCAAGCTTGACAGGGCCCTG<br/> CCTGATCCAATAAAAATTTTTGAAATAGGCCATGCTACAGAAAAGAGTCCGACGG<br/> CAAAGAACACCTCGAAGAGTTTACCATGCTGAACTTCTTCCAGATGGGATCGGGAT<br/> GCACACGGGAAAATCTTGAAAGCATAATTACGGACTTCCTGAACCACCTGGGAATT<br/> GATTTCAAGATCGTAGGCGATTCTGCATGGTCTTCGGGGATACCCTTGATGTAATG<br/> CACGGAGACCTGGAACCTTCTCTGCAGTAGTCGGACCCATAACCGCTTGACCGGGA<br/> ATGGGGTATTGATAAACCTGGATAGGGGCAGGTTTCGGGCTCGAACGCCTTCTAA<br/> AGGTTAAACACGACTTTAAAAATATCAAGAGAGCTGCAAGGTCCGAGTCTTACTAT<br/> AACGGGATTTCTACCAACCTGTAA</p> |
| Protein<br>Sequence | <p>MDKKPLNTLISATGLWMSRTGTIHKIKHHEVSRSKIYIEMACGDHLVVNNSRSSRTARA<br/> LRHHKYRKTCKRCRVSDLEDLNKFLTKANEDQTSVKVKVVSAPTRTKKAMPKSVARA<br/> PKPLENTEAAQAQPSGSKFSPAIPVSTQESVSVPASVSTSISSISTGATASALVKGNTNPIT<br/> SMSAPVQASAPALTKSQDRLEVLLNPKDEISLNSGKPFRELESELLSRRKKDLQIYA<br/> EERENYLGKLEREITRFFVDRGFLEIKSPILIPLEYIERMGIDNDELKQIFRVDKNFCL<br/> RPLAPNIFNYGRKLDRALPDPIKIFEIGPCYRKESDGKEHLEEFMLNFFQMGSCTR<br/> ENLESIITDFLNHLGIDFKIVGDSCMVFGDTLDVMHGDLELSSAVVGIPLDREWIDK<br/> PWIGAGFGLERLLKVKHDFKNIKRAARSESYNGISTNL*</p>                                                                                                                                                                                                                                                                                                                                                                                                                                                                                                                                                                                                                                                                                                                                                                                                                                                                                                                                                                                                                                                 |



|                     |                                                                                                                                                                                                                                                                                                                                                                                                                                                                                                                                                                                                                                                                                                                                                                                                                                                                                                                                                                                                                                                                                                                                                                                                                                                                                                                                                                                                                                                                                                                                                               |
|---------------------|---------------------------------------------------------------------------------------------------------------------------------------------------------------------------------------------------------------------------------------------------------------------------------------------------------------------------------------------------------------------------------------------------------------------------------------------------------------------------------------------------------------------------------------------------------------------------------------------------------------------------------------------------------------------------------------------------------------------------------------------------------------------------------------------------------------------------------------------------------------------------------------------------------------------------------------------------------------------------------------------------------------------------------------------------------------------------------------------------------------------------------------------------------------------------------------------------------------------------------------------------------------------------------------------------------------------------------------------------------------------------------------------------------------------------------------------------------------------------------------------------------------------------------------------------------------|
| 4                   | <b>Mm-PylRS-<math>\delta</math>Vin-H (hit-3) in eukaryotic expression vector:</b>                                                                                                                                                                                                                                                                                                                                                                                                                                                                                                                                                                                                                                                                                                                                                                                                                                                                                                                                                                                                                                                                                                                                                                                                                                                                                                                                                                                                                                                                             |
| DNA<br>sequence     | <p>ATGGATAAAAAACCACTAAACACTCTGATATCTGCAACCGGGCTCTGGATGTCCAG<br/> GACCGGAACAATTCATAAAATAAAACACCACGAAGTCTCTCGAAGCAAATCTATA<br/> TTGAAATGGCATGCGGAGACCACCTTGTGTAAACAACCTCCAGGAGCAGCAGGAC<br/> TGCAAGAGCGCTCAGGCACCACAAATACAGGAAGACCTGCAAACGCTGCAGGGTT<br/> TCGGATGAGGATCTCAATAAGTTCCTCACAAAGGCAAACGAAGACCAGACAAGCG<br/> TAAAAGTCAAGGTCGTTTCTGCCCTACCAGAACGAAAAAGGCAATGCCAAAATC<br/> CGTTGCGAGAGCCCCGAAACCTCTTGAGAATACAGAAGCGGCACAGGCTCAACCT<br/> TCTGGATCTAAATTTTACCTGCGATACCGGTTTCCACCCAAGAGTCAGTTTCTGTC<br/> CCGGCATCTGTTTCAACATCAATATCAAGCATTCTACAGGAGCAACTGCATCCGCA<br/> CTGGTAAAAGGGAATACGAACCCATTACATCCATGTCTGCCCTGTTTCAGGCAAG<br/> TGCCCCCGCACTTACGAAGAGCCAGACTGACAGGCTTGAAGTCCTGTAAACCCA<br/> AAAGATGAGATTTCCCTGAATTCGGCAAGCCTTTCAGGGAGCTTGAGTCCGAATT<br/> GCTCTCTCGCAGAAAAAAGACCTGCAGCAGATCTACGCGGAAGAAAGGGAGAAT<br/> TATCTGGGGAAACTCGAGCGTGAAATTACCAGGTTCTTTGTGGACAGGGGTTTTCT<br/> GGAAATAAAATCCCGATCCTGATCCCTCTTGAGTATATCGAAAGGATGGGCATTGA<br/> TAATGATACCGAACTTTCAAACAGATCTTCAGGGTTGACAAGAACTTCTGCCTGA<br/> GACCCATGCTTGCTCCAAACATGCTGAACTACCTGCGCAAGCTTGACAGGGCCCTG<br/> CCTGATCCAATAAAAATTTTTGAAATAGGCCATGCTACAGAAAAGAGTCCGACGG<br/> CAAAGAACACCTCGAAGAGTTTACCATGCTGGACTTCAAGCAGATGGGATCGGGA<br/> TGCACACGGGAAAATCTTGAAAGCATAATTACGGACTTCTGAACCACCTGGGAAT<br/> TGATTTCAAGATCGTAGGCGATTCTGCATGGTCTTCGGGGATAACCCTTGATGTAAT<br/> GCACGGAGACCTGGAACCTTCTCTGCAGTAGTCGGACCCATACCGCTTGACCGGG<br/> AATGGGGTATTGATAAACCTGGATAGGGGCAGGTTTCGGGCTCGAACGCCTTCTA<br/> AAGGTAAACACGACTTTAAAAATATCAAGAGAGCTGCAAGGTCCGAGTCTTACTA<br/> TAACGGGATTTCTACCAACCTGTAA</p> |
| Protein<br>Sequence | <p>MDKKPLNTLISATGLWMSRTGTIHKIKHHEVSRSKIYIEMACGDHLVVNNSRSSRTARA<br/> LRHHKYRKTCKRCRVSDLEDLNKFLTKANEDQTSVKVKVVSAPTRTKKAMPKSVARA<br/> PKPLENTEAAQAQPSGSKFSPAIPVSTQESVSVPASVSTSISSISTGATASALVKGNTNPIT<br/> SMSAPVQASAPALTKSQTDRLVLLNPKDEISLNSGKPFRELESELLSRKKDLQIYA<br/> EERENYLGLKLEREITRFFVDRGFLEIKSPILIPLEYIERMGIDNDTELSKQIFRVDKNFCL<br/> RPMLAPNMLNYLRKLDRALPDIKIFEIGPCYRKESDGKEHLEEFMLDFKQMGSGCT<br/> RENLESIITDFLNHLGIDFKIVGDSCMVFGDTLDVMHGDLELSSAVVGPIPLDREWID<br/> KPWIGAGFGLERLLKVKHDFKNIKRAARSESYYNGISTNL*</p>                                                                                                                                                                                                                                                                                                                                                                                                                                                                                                                                                                                                                                                                                                                                                                                                                                                                                                                                                                                                                                          |

|                         |                                                                                                                                                                                                                                                                                                                                                                                                                                                                                                                                                                                                                                                                                                                                                                                                                                                 |
|-------------------------|-------------------------------------------------------------------------------------------------------------------------------------------------------------------------------------------------------------------------------------------------------------------------------------------------------------------------------------------------------------------------------------------------------------------------------------------------------------------------------------------------------------------------------------------------------------------------------------------------------------------------------------------------------------------------------------------------------------------------------------------------------------------------------------------------------------------------------------------------|
| <b>5</b>                | <b>GFP-HisTag in prokaryotic expression vector</b>                                                                                                                                                                                                                                                                                                                                                                                                                                                                                                                                                                                                                                                                                                                                                                                              |
| <b>DNA sequence</b>     | <p>ATGGGTAAAGGAGAAGAAGCTTTTCACTGGAGTTGTCCCAATTCTTGTGAATTAGAT<br/> GGTGATGTTAATGGGCACAAATTTTCTGTCAAGTGGAGAGGGTGAAGGTGATGCAAC<br/> ATACGGAAAACCTTACCCTTAAATTTATTTGCACTACTGGAAAACCTGTTCCATGG<br/> CCAACACTTGTCACTACTTTCTCTTATGGTGTTCATGCTTTTCCCGTTATCCGGATCA<br/> CATGAAACGGCATGACTTTTTCAAGAGTGCCATGCCCGAAGGTTATGTACAGGAACG<br/> CACTATATCTTTCAAAGATGACGGGAACTACAAGACGCGTGCTGAAGTCAAGTTTGA<br/> AGGTGATACCCTTGTTAATCGTATCGAGTTAAAAGGTATTGATTTTAAAGAAGATGGA<br/> AACATTCTCGGACACAAACTCGAGTACAACATAACTCACACAATGTATACATCACG<br/> GCAGACAAACAAAAGAATGGAATCAAAGCTAACTTCAAATTCGCCACAACATTGA<br/> AGATGGATCCGTTCAACTAGCAGACCATTATCAACAAAATACTCCAATTGGCGATGG<br/> CCCTGTCCTTTTACCAGACAACCATTACCTGTCGACACAATCTGCCCTTTCGAAAGAT<br/> CCCAACGAAAAGCGTGACCACATGGTCTTCTTGAGTTTGTAACTGCTGCTGGGATT<br/> ACACATGGCATGGATGAACTCTACAAAGGGCCCCATCATCACCATCACCATTGA</p> |
| <b>Protein Sequence</b> | <p>MGKGEELFTGVVPILVELDGDVNGHKFSVSSEGEEDATYGKLTLLKFICTTGKLPVWPWT<br/> LVTTFSYGVQCFSRYPDHMKRHDFFKSAMPEGYVQERTISFKDDGNYKTRAEVKFEGD<br/> TLVNRIELKGIDFKEDGNILGHKLEYNYNSHNVYITADKQKNGIKANFKIRHNIEDGSVQ<br/> LADHYQQNTPIGDGPVLLPDNHYLSTQSALS KDPNEKRDHMLLEFVTAAGITHGMDE<br/> LYKGP<b>HHHHHH</b>*</p>                                                                                                                                                                                                                                                                                                                                                                                                                                                                                                                                                  |

|                         |                                                                                                                                                                                                                                                                                                                                                                                                                                                                                                                                                                                                                                                                                                                                                                                                                                                             |
|-------------------------|-------------------------------------------------------------------------------------------------------------------------------------------------------------------------------------------------------------------------------------------------------------------------------------------------------------------------------------------------------------------------------------------------------------------------------------------------------------------------------------------------------------------------------------------------------------------------------------------------------------------------------------------------------------------------------------------------------------------------------------------------------------------------------------------------------------------------------------------------------------|
| <b>6</b>                | <b>GFP-FLAG in eukaryotic expression vector:</b>                                                                                                                                                                                                                                                                                                                                                                                                                                                                                                                                                                                                                                                                                                                                                                                                            |
| <b>DNA sequence</b>     | <p>ATGGTGAGCAAGGGCGAGGAGCTGTTACCGGGGTGGTGCCCATCCTGGTTCGAGCT<br/> GGACGGCGACGTAAACGGCCACAAGTTCAGCGTGTCCGGCGAGGGCGAGGGCGAT<br/> GCCACCTATGGCAAGCTGACCCTGAAGTTCATCTGCACCACCGCAAGCTGCCCGTG<br/> CCCTGGCCACCCTCGTGACCACCCTGACCTACGGCGTGCAGTGCTTCAGCCGCTAC<br/> CCCGACCACATGAAGCAGCAGACTTCTTCAAGTCCGCCATGCCCGAAGGCTACGT<br/> CCAGGAGCGCACCATCTTCTTCAAGGACGACGGCAACTACAAGACCCGCGCCGAGG<br/> TGAAGTTCGAGGGCGACACCCTGGTGAACCGCATCGAGCTGAAGGGCATCGACTTC<br/> AAGGAGGACGGCAACATCCTGGGGCACAAGCTGGAGTACAACACTACAACAGCCACA<br/> ACGTCTATATCATGGCCGACAAGCAGAAGAACGGCATCAAGGTGAACCTCAAGATCC<br/> GCCACAACATCGAGGACGGCAGCGTGCAGCTCGCCGACCACTACCAGCAGAACAC<br/> CCCCATCGGCGACGGCCCCGTGCTGCTGCCCACAACCACTACCTGAGCACCCAGT<br/> CCGCCCTGAGCAAAGACCCCAACGAGAAGCGCGATCACATGGTCCCTGCTGGAGTTC<br/> GTGACCGCCGCGGGATCACTCTCGGCATGGACGAGCTGTACAaGGATTACAAGgAT<br/> GACGACGATAAGTAA</p> |
| <b>Protein Sequence</b> | <p>MVSKGEELFTGVVPILVELDGDVNGHKFSVSSEGEEDAT<b>Y</b>GKLTLLKFICTTGKLPVWPWT<br/> TLVTTLYGVQCFSRYPDHMKQHDFFKSAMPEGYVQERTIFFKDDGNYKTRAEVKFEG<br/> DTLVNRIELKGIDFKEDGNILGHKLEYNYNSHNVYIMADKQKNGIKVNFKIRHNIEDGS<br/> VQLADHYQQNTPIGDGPVLLPDNHYLSTQSALS KDPNEKRDHMLLEFVTAAGITLGM<br/> DELYK<b>DYKDDDDK</b>*</p>                                                                                                                                                                                                                                                                                                                                                                                                                                                                                                                                                      |

|                             |                                                                                                                                                                                                                                                                                                                                                                                                                                                                                                                                                                   |
|-----------------------------|-------------------------------------------------------------------------------------------------------------------------------------------------------------------------------------------------------------------------------------------------------------------------------------------------------------------------------------------------------------------------------------------------------------------------------------------------------------------------------------------------------------------------------------------------------------------|
| <b>7</b>                    | <b>Myoglobin-6×His in prokaryotic expression vector:</b>                                                                                                                                                                                                                                                                                                                                                                                                                                                                                                          |
| <b>DNA<br/>sequence</b>     | <p>ATGGTTCTGTCTGAAGGTGAATGGCAGCTGGTTCTGCATGTTTGGGCTAAAGTTGAA<br/> GCTGACGTCGCTGGTCATGGTCAGGACATCTTGATTGACTGTTCAAATCTCATCCG<br/> GAAACTCTGGAAAAATTCGATCGTTTCAAACATCTGAAAACTGAAGCTGAAATGAA<br/> AGCTTCTGAAGATCTGAAAAAAGTGGGTGTTACCGCGTAACTGCCCTAGGTGCTAT<br/> CCTTAAGAAAAAAGGGCATCATGAAGCTGAGCTCAAACCGCTTGACAATCGCATG<br/> CTACTAAACATAAGATCCCGATCAAATACCTGGAATTCATCTCTGAAGCGATCATCCA<br/> TGTTCTGCATTCTAGACATCCAGGTGACTTCGGTGCTGACGCTCAGGGTGCTATGAA<br/> CAAAGCTCTGGAGCTGTTCCGTAAAGATATCGCTGCTAAGTACAAAGAAGCTGGGTTA<br/> CCAGGGTGGCTCGGGACATCATCACCATCACCATTGA</p> |
| <b>Protein<br/>Sequence</b> | <p>MVLSEGEWQLVLHVWAKVEADVAGHGQDILIRLFKSHPETLEKFDRLFHLKTEAEMK<br/> ASEDLKKVGVLTALGAILKKKGHHEAELKPLAQS<sup>H</sup>ATKHKIPIKYLEFISEAIIHVLHS<br/> RHPGDFGADAQGAMNKALELFRKDIAAKYKELGYQGGSG<sup>HHHHHH</sup>*</p>                                                                                                                                                                                                                                                                                                                                                       |

|                             |                                                                                                                                                                                                                                                                                                                                                                                                                                                                                                                                                                                                                                                                                                                                                                                                                                                                                     |
|-----------------------------|-------------------------------------------------------------------------------------------------------------------------------------------------------------------------------------------------------------------------------------------------------------------------------------------------------------------------------------------------------------------------------------------------------------------------------------------------------------------------------------------------------------------------------------------------------------------------------------------------------------------------------------------------------------------------------------------------------------------------------------------------------------------------------------------------------------------------------------------------------------------------------------|
| <b>8</b>                    | <b>APEX2-6×His in prokaryotic expression vector:</b>                                                                                                                                                                                                                                                                                                                                                                                                                                                                                                                                                                                                                                                                                                                                                                                                                                |
| <b>DNA<br/>sequence</b>     | <p>ATGGGTAAATCTTACCCGACCGTTTCTGCGGACTACCAGGACGCGGTTGAAAAAGC<br/> GAAAAAAAACCTGCGTGGTTTCATCGCGGAAAAACGTTGCGCGCCGCTGATGCTGC<br/> GTCTGGCGTTCCACTCTGCGGGTACCTTCGACAAAGGTACCAAACCGGTGGTCCG<br/> TTCGGTACCATCAAACACCCGGCGGAACCTGGCGCACTCTGCGAACAACGGTCTGGA<br/> CATCGCGGTTCTGCTGCTGGAACCGCTGAAAGCGGAATCCCGATCCTGTCTTACGC<br/> GGACTTCTACCAGCTGGCGGGTGTGTTGCGGTTGAAGTTACCGGTGGTCCGAAAG<br/> TTCCGTTCCACCCGGTTCGTGAAGACAAACCGGAACCGCCGCGGAAGGTCGTCTG<br/> CCGGACCCGACCAAAGGTTCTGACCACCTGCGTGACGTTTTCCGGTAAAGCGATGGG<br/> TCTGACCGACCAGGACATCGTTGCGCTGTCTGGTGGTCATACCATCGGTGCGGCGCA<br/> CAAAGAACGTTCTGGTTTTGAAGGTCCGTGGACCTTAACCCGCTGATCTTCGACAA<br/> CTTTACTTCACCGAACTGCTGTCTGGTGAAAAAGAAGGTCTGCTGCAGCTGCCGTC<br/> TGACAAAGCGCTGCTGTCTGACCCGGTTTTCCGTCCGCTGGTTGACAAATACGCGGC<br/> GGACGAAGACGCGTTCTTCGCGGACTACGCGGAAGCGCACCCAGAAACTGTCTGAAC<br/> TGGGTTTTCGCGGACGCGCATCATCATCATCATTGA</p> |
| <b>Protein<br/>Sequence</b> | <p>MGKSYPTVSADYQDAVEKAKKKLRGFIAEKRCAPLMLRLAFHSAGTFDKGKTGGPF<br/> GTIKHPAELAHSANNGLDIAVRLLEPLKAEFPILSYADFYQLAGVVAVEVTGGPKVPFHP<br/> GREDKPEPPPEGRLPDPTKGS DHLRDVFGKAMGLTDQDIVALSGG<sup>H</sup>TIGAAHKERSGFE<br/> GPWTSNPLIFDNSYFTELLSGEKEGLLQLPSDKALLSDPVFRPLVDKYAADEDAFFADYA<br/> EAHQKLSLGFADA<sup>HHHHHH</sup>*</p>                                                                                                                                                                                                                                                                                                                                                                                                                                                                                                                                                               |

|                         |                                                                                                                                                                                                                                                                                                                                                                                                                                                                                                                                                                                                                                                                                                                                                                                              |
|-------------------------|----------------------------------------------------------------------------------------------------------------------------------------------------------------------------------------------------------------------------------------------------------------------------------------------------------------------------------------------------------------------------------------------------------------------------------------------------------------------------------------------------------------------------------------------------------------------------------------------------------------------------------------------------------------------------------------------------------------------------------------------------------------------------------------------|
| <b>9</b>                | <b>dnHEM1.2-6×His in prokaryotic expression vector:</b>                                                                                                                                                                                                                                                                                                                                                                                                                                                                                                                                                                                                                                                                                                                                      |
| <b>DNA sequence</b>     | <p>ATGGTGAGCCTGGATCAGGCGATTGATATTCTGGTGGTGGCGGCGAAACTGGGCACC<br/> ACCGTGGAAGAAGCGGTGAAACGCGCGCTGTGGCTGAAAACCAAATTAGGCGTGTC<br/> GTTGGACCAGGCGCTGCGTATTCTGAGCGATGCCGCCAATACCGGCACGACGGTTGA<br/> AGAGGCCGTTAAACGTGCACTGAAACTGAAGACGAAGCTCGGTGTTTCGTTAGAGG<br/> CGGCGCTGGCGATTTTAAGCGCAGCCGCGCAGCTGGGTACTACTGTGGAGGAGGCG<br/> GTTAAGCGCGCGTTGAAATTGAAAACGAAGTTGGGCGTGGATCTGGAAACCGCGGC<br/> CTTAGCGTTGTTGACCGCAGCCAAGTTAGGTACGACCGTTGAGGAAGCAGTTAAGC<br/> GCGCCCTGAAGTTAAAGACCAAGTTGGGTGTGAGCTTGATTGAGGCACTGCATATTC<br/> TGCTGACTGCCGCGGTGTTAGGCACTACCGTCGAAGAGGCGGTGTATCGCGCCTTGA<br/> AGTTGAAAATAAATTGGGGTTAGTCTGCTGCAGGCGGCTGCCATCTTGCTTTTAG<br/> CAGCCCCTGGGGACTACGGTGGAGGAGGCCGTAAAGCGTGCCTTAAAATTA<br/> ACCAAATTGGGTGGGGCAGCGGTGGCAGCCATCATTGGGGCTCGGGCTCGCATCA<br/> TCACCACCATCATTGA</p> |
| <b>Protein Sequence</b> | <p>MVSLDQAIDILVVAAKLGTVEEAVKRALWLKTKLGVSLDQALRILSDAANTGTTVEE<br/> AVKRALKLKTKLGVSLAALAILSAQAQLGTTVEEAVKRALKLKTKLGVLDLETAALAL<br/> LTAAKLGTVEEAVKRALKLKTKLGVSLIEALHILLTAAVLGTTVEEAVYRALKLKTKL<br/> GVSLAQAAAILLAARLGTVEEAVKRALKLKTKLGGSGSGSHHWGSGSHHHHHH*</p>                                                                                                                                                                                                                                                                                                                                                                                                                                                                                                                                 |

|                         |                                                                                                                                                                                                                                                                                                                                                                                                                                                                                                                                                                                                                                                                                                                                                                                                                                           |
|-------------------------|-------------------------------------------------------------------------------------------------------------------------------------------------------------------------------------------------------------------------------------------------------------------------------------------------------------------------------------------------------------------------------------------------------------------------------------------------------------------------------------------------------------------------------------------------------------------------------------------------------------------------------------------------------------------------------------------------------------------------------------------------------------------------------------------------------------------------------------------|
| <b>10</b>               | <b>OE1.3-StrepTagII in prokaryotic expression vector:</b>                                                                                                                                                                                                                                                                                                                                                                                                                                                                                                                                                                                                                                                                                                                                                                                 |
| <b>DNA sequence</b>     | <p>ATGATTCGTGCGGTATTCTTTGATAGCCCGGTACTCTGAATAGCGTTGAAGGTCATG<br/> CTAAAATGCATCTGAAAATTATGGAGGAAGTGCTGGGTGACTATCCGCTGAACCCGA<br/> AAACCCTTCTTGACGAATAACAATAAAGTACCCGCGAAGCGTTCTCTAACTATGCGG<br/> GCAAACCGTATCGCGGTCTGCGTGATATCCTGGAAGAAGTAATGCGTAAACTGGCGG<br/> AAAAGTACGGTTTCAAATACCCTGAAAACCTCTGGGAAATCTCCCTGCGCATGTCTC<br/> AACGCTACGGCGAGCTGTACCCGGAAGTGGTGGAAAGTACTGAAATCTCTGAAAGGT<br/> AAATATCACGTTGGCATGATCACCGATTCCGGTACCGAGCAGGCCATGGCATTCTTG<br/> GACGCACTGGGCATCAAAGACCTGTTTCGATTCCATCACCACGTCTGAAGAAGCTGG<br/> TTTCTTTAAACCGCACCCACGCATCTTCGAACTGGCTCTGAAGAAAGCCGGCGTTAA<br/> AGGCGAGGAAGCAGTGTACGTTGGTGACAACCCGGTCAAAGACTGTGGTGGTTCTA<br/> AGAACCTGGGTATGACTAGCATCCTGCTGGATCGTAAAGGTGAGAAACGTGAATTCT<br/> GGGATAAGTGCGACTTTATCGTCTCCGACCTGCGCGAAGTTATTAAGATTGTTGACG<br/> AACTGAACGGTCAGGGCTCTTGAGTCAACCCACAGTTTGAGAAATGA</p> |
| <b>Protein Sequence</b> | <p>MIRAVFFDSPGTLNSVEGHAKMHKIMEEVLGDYPLNPKTLLDEYNKLTREAFSNIYAG<br/> KPYRGLRDILEEVMRKLAEKYGFKYPENFWEISLRMSQRYGELYPEVVEVLKSLKGKY<br/> HVGMITDSGTEQAMAFLDALGIKDLFDSITTSEEAGFFKPHPRIFELALKKAGVKGEEA<br/> VYVGDNPVKDCGGSKNLGMTSILLDRKGEKREFWDKCDFIVSDLREVIKIVDELNGQG<br/> SWSHPQFEK*</p>                                                                                                                                                                                                                                                                                                                                                                                                                                                                                                                                                        |

|                 |                                                                                                                                                                                                                                                                                                                                                                                                                                                                                                                                                                                                                                                                                                                                                                                                                                                                                                                                                                                                                                                                                                                                                                                                                                                                                                                                                                                                                                                                                                                                                                                                                                                                                                                                                                                                                                                                                                                                                                                                                                                                                                                                                                                                                                                                                                                                                                                                                                                                                                                                                                                                                                                                                                                                                                                                                                                                                                                                                                                   |
|-----------------|-----------------------------------------------------------------------------------------------------------------------------------------------------------------------------------------------------------------------------------------------------------------------------------------------------------------------------------------------------------------------------------------------------------------------------------------------------------------------------------------------------------------------------------------------------------------------------------------------------------------------------------------------------------------------------------------------------------------------------------------------------------------------------------------------------------------------------------------------------------------------------------------------------------------------------------------------------------------------------------------------------------------------------------------------------------------------------------------------------------------------------------------------------------------------------------------------------------------------------------------------------------------------------------------------------------------------------------------------------------------------------------------------------------------------------------------------------------------------------------------------------------------------------------------------------------------------------------------------------------------------------------------------------------------------------------------------------------------------------------------------------------------------------------------------------------------------------------------------------------------------------------------------------------------------------------------------------------------------------------------------------------------------------------------------------------------------------------------------------------------------------------------------------------------------------------------------------------------------------------------------------------------------------------------------------------------------------------------------------------------------------------------------------------------------------------------------------------------------------------------------------------------------------------------------------------------------------------------------------------------------------------------------------------------------------------------------------------------------------------------------------------------------------------------------------------------------------------------------------------------------------------------------------------------------------------------------------------------------------------|
| 11              | P450-BM3-HStar-8×His in prokaryotic expression vector:                                                                                                                                                                                                                                                                                                                                                                                                                                                                                                                                                                                                                                                                                                                                                                                                                                                                                                                                                                                                                                                                                                                                                                                                                                                                                                                                                                                                                                                                                                                                                                                                                                                                                                                                                                                                                                                                                                                                                                                                                                                                                                                                                                                                                                                                                                                                                                                                                                                                                                                                                                                                                                                                                                                                                                                                                                                                                                                            |
| DNA<br>sequence | <p> ATGACCATCAAAGAAATGCCGCAGCCGAAAACCTTCGGTGAACCTGAAAAACCTGCC<br/> GCTGCTGAACACCGACAAACCGGTTTCAGGCGCTGATGAAAATCGCGGACGAACTGG<br/> GTGAAATCTTCAAATTCGAAGCGCCGGGTCGTGTTACCCGTTACCTGTCTTCTCAGC<br/> GTCTGATCAAAGAAGCGTGCGACGAATCTCGTTTCGACAAAAACCTGTCTCAGGCG<br/> CTGAAATTCATGCGTGAATTCGCGGGTGACGGTCTGTTACCTCTTGGACCCACGAA<br/> AAAACTGGAAAAAAGCGCACAACATCCTGCTGCCGTCTTTCTCTCAGCAGGCGAT<br/> GAAAGGTTACCACGCGATGATGGTTGACATCGCGGTTTCAGCTGGTTTCAGAAATGGG<br/> AACGTCTGAACGCGGACGAACACATCGAAGTTCCGGAAGACATGACCCGTCTGACC<br/> CTGGACACCATCGGTCTGTGCGGTTTCAACTACCGTTTCAACTCTTTCTACCGTGACC<br/> AGCCGCACCCGTTTCATCACCTCTATGGTTCGTGCGGTTGACGAAGCGATGAACAAAC<br/> TGCAGCGTGCGAACCCGACGACCCGGCGTACGACGAAAACAAACGTCAGTTCCA<br/> GGAAGACATCAAAGTTATGAACGACCTGGTTGACAAAATCATCGCGGACCGTAAAG<br/> CGTCTGGTGAACAGTCTGACGACCTGCTGACCCACATGCTGAACGGTAAAGACCCG<br/> GAAACCGGTGAACCGCTGGACGACGAAAACATCCGTTACCAGATCATCACCTTCCT<br/> GATCGCGGGTCACGAAGCGACCTCTGGTCTGCTGTCTTTTCGCGCTGTACTTCCTGGT<br/> TAAAAACCCGCACGTTCTGCAGAAAGCGGCGGAAGAAGCGGCGCGTGTCTGGTTG<br/> ACCCGGTTCGTTTACAAACAGGTTAAACAGCTGAAATACGTTGGTATGGTTCTGA<br/> ACGAAGCGCTGCGTCTGTGGCCGACCGCGCCGGCGTTCTCTCTGTACGCGAAAGAA<br/> GACACCGTTCGGGTGGTGAATACCCGCTGGAAAAAGGTGACGAACTGATGGTTCT<br/> GATCCCGCAGCTGCACCGTGACAAAACCATCTGGGGTGACGACGTTGAAGAATTCC<br/> GTCCGGAACGTTTCGAAAACCCGTCTGCGATCCCGCAGCACGCGTTCAAACCGTTC<br/> GGTAACGGTCAGCGTGCGCATATCGGTTCAGCAGTTTCGCGCTGCACGAAGCGACCT<br/> GGTTCGGGTATGATGCTGAAACACTTCGACTTCGAAGACCACCAACTACGAACT<br/> GGACATCAAAGAAACCTGGACCCTGAAACCGGAAGGTTTCGTTGTTAAAGCGAAAT<br/> CTAAAAAATCCCGCTGGGTGGTATCCCGTCTCCGTCTACCGAACAGTCTGCGAAAA<br/> AAGTTCGTAATAAAGCGGAAAACGCGCACAACACCCCGCTGCTGGTTCGTACGGT<br/> TCTAACATGGGTACCGCGGAAGGTACCGCGCGTGACCTGGCGGACATCGCGATGTCT<br/> AAAGGTTTCGCGCCGCAGGTTGCGACCCTGGACTCTCACGCGGGTAACCTGCCGCG<br/> TGAAGGTGCGGTTCTGATCGTTACCGCGTCTTACAACGGTACCCCGCCGGACAACGC<br/> GAAACAGTTCGTTGACTGGCTGGACCAGGCGTCTGCGGACGAAGTTAAAGGTGTTT<br/> GTTACTCTGTTTTTCGGTTGCGGTGACAAAAACTGGGCGACCACCTACCAGAAAGTTC<br/> CGGCGTTCATCGACGAAACCCCTGGCGGCGAAAGGTGCGGAAAACATCGCGGACCGT<br/> GGTGAAGCGGACGCGTCTGACGACTTCGAAGGTACCTACGAAGAATGGCGTGAACA<br/> CATGTGGTCTGACGTTGCGGCGTACTTCAACCTGGACATCGAAAACCTCTGAAGACA<br/> ACAAATCTACCCTGTCTCTGCAGTTCGTTGACTCTGCGGCGGACATGCCGCTGGCGA<br/> AAATGCACGGTGC GTTCTCTACCAACGTTGTTGCGTCTAAAGAACTGCAGCAGCCG<br/> GGTTCGCGGTTCTACCCGTCACCTGGAATCGAACTGCCGAAAGAAGCGTCTTAC<br/> CAGGAAGGTGACCACCTGGGTGTTATCCCGCGTAACTACGAAGGTATCGTTAACCGT<br/> GTTACCGCGCGTTCGGTCTGGACGCGTCTCAGCAGATCCGTCTGGAAGCGGAAGA<br/> AGAAAAACTGGCGCACCTGCCGCTGGCGAAAACCGTTTCTGTTGAAGAACTGCTGC<br/> AGTACGTTGAACTGCAGGACCCGGTTACCCGTACCCAGCTGCGTGCGATGGCGGCG<br/> AAAACCGTTTGCCCGCCGCACAAAGTTGAACTGGAAGCGCTGCTGGAAAAACAGG<br/> CGTACAAAGAACAGGTTCTGGCGAAACGTCTGACCATGCTGGAACCTGCTGGAAAAA<br/> TACCCGGCGTGCGAAATGAAATTCTCTGAATTCATCGCGCTGCTGCCGTCTATCCGTC<br/> CGCGTTACTACTCTATCTTCTTCTCCGCGTGTGACGAAAACAGGCGTCTATCAC<br/> CGTTTCTGTTGTTTCTGGTGAAGCGTGGTCTGGTTACGGTGAATACAAAGGTATCGC </p> |

|                                    |                                                                                                                                                                                                                                                                                                                                                                                                                                                                                                                                                                                                                                                                                                                                                                                                                                                                                                                                                                                                                                                                                                                                                                                                              |
|------------------------------------|--------------------------------------------------------------------------------------------------------------------------------------------------------------------------------------------------------------------------------------------------------------------------------------------------------------------------------------------------------------------------------------------------------------------------------------------------------------------------------------------------------------------------------------------------------------------------------------------------------------------------------------------------------------------------------------------------------------------------------------------------------------------------------------------------------------------------------------------------------------------------------------------------------------------------------------------------------------------------------------------------------------------------------------------------------------------------------------------------------------------------------------------------------------------------------------------------------------|
| <p><b>DNA<br/>sequence</b></p>     | <p>GTCTAACTACCTGGCGGAACTGCAGGAAGGTGACACCATCACCTGCTTCATCTCTAC<br/> CCC GCAGTCTGAATTCACCCTGCCGAAAGACCCGGAAACCCCGCTGATCATGGTTG<br/> GTCCGGGTACCGGTGTTGCGCCGTTCCGTGGTTTCGTTTCAGGCGCGTAAACAGCTGA<br/> AAGAACAGGGTCAGTCTCTGGGTGAAGCGCACCTGTACTTCGGTTGCCGTTCTCCG<br/> CACGAAGACTACCTGTACCAGGAAGAACTGGAAAACGCGCAGTCTGAAGGTATCAT<br/> CACCTGCACACCGCGTTCCTCTCGTATGCCGAACCAGCCGAAAACCTACGTTACAGCA<br/> CGTTATGGAACAGGACGGTAAAAAACTGATCGAACTGCTGGACCAGGGTGCGCACT<br/> TCTACATCTGCGGTGACGGTTCTCAGATGGCGCCGGCGGTTGAAGCGACCCTGATGA<br/> AATCTTACGCGGACGTTACCAGGTTTCTGAAGCGGACGCGCGTCTGTGGCTGCAG<br/> CAGCTGGAAGAAAAAGGTCGTTACGCGAAAGACGTTTGGGCGGGTCTGGAACATCA<br/> TCACCACCATCACCATCATTGA</p>                                                                                                                                                                                                                                                                                                                                                                                                                                                                                                                              |
| <p><b>Protein<br/>Sequence</b></p> | <p>MTIKEMPQPKTFGELKNLPLNLDKPVQALMKIADELGEIFKFEAPGRVTRYLSSQRLIK<br/> EACDESRFDKNLSQALKFMRDFAGDGLFTSWTHEKNWKKAHNILLPSFSQQAMKGYH<br/> AMMVDAIVQLVQKWERLNADEHIEVPEDMTRLTLDTIGLCGFNYRFNSFYRDQPHFIT<br/> SMVRAVDEAMNKLQRANPDDPAYDENKRQFQEDIKVMNDLVDKIADRKASGEQSD<br/> LLTHMLNGKDPETGEPLDDENIRYQIITFLIAGHEATSGLLSFALYFLVKNPHVLQKAAEE<br/> AARVLVDPVPSYKQVKQLKYVGMVLNEALRLWPTAPAFSLYAKEDTVLGGEYPLEKG<br/> DELMVLIPQLHRDKTIWGGDVEEFRPERFENPSAIPQHAFKPFNGQRAHIGQQFALHE<br/> ATLVLGMMLKHFDFEDHTNYELDIKETWTLKPEGFVVKAKSKKIPLGGIPSPSTEQSAK<br/> KVRKKAENAHTNPLLVLVYGSNMGTAEGTARDLADIAMSKGFAPQVATLDSHAGNLPRE<br/> GAVLIVTASYNHPPDNAKQFVDWLDQASADEVKGVRYSVFGCGDKNWATTYQKVPA<br/> FIDETLAAKGAENIADRGEADASDDFEGTYEEWREHMWSDVAAYFNLDIENSEDNKST<br/> LSLQFVDSAADMPLAKMHGAFSTNVVASKELQQPGSARSTRHLEIPLKEASYQEGDH<br/> LGVIPRNYEGIVNRVTARFGLDASQQIRLEAEEEEKLAHLPLAKTVSVEELLQYVELQDP<br/> VTRTQLRAMAAKTVCPPHKVELEALLEKQAYKEQVLAKRLTMLELLEKYPACEMKFS<br/> EFIALLPSPRYYSISSPRVDEKQASITVSVVSGEAWSGYGEYKGIASNYLAELQEGDT<br/> ITCFISTPQSEFTLPKDPETPLIMVPGTG VAPFRGFVQARKQLKEQGQSLGEAHLVFC<br/> RSPHEDYLYQEELENAQSEGIITLHTAFSRMPNPKTYVQHVMEQDGKKLIELLDQGAH<br/> FYICGDGSQMAPAVEATLMKSYADVHQVSEADARLWLQLEEKGRYAKDVWAGLEHH<br/> HHHHHH*</p> |

## Supplementary References

1. Yar, M., McGarrigle, E. M. & Aggarwal, V. K. An Annulation Reaction for the Synthesis of Morpholines, Thiomorpholines, and Piperazines from  $\beta$ -Heteroatom Amino Compounds and Vinyl Sulfonium Salts. *Angew. Chem. Int. Ed.* **47**, 3784-3786 (2008).
2. Lavis, L. D., Chao, T.-Y. & Raines, R. T. Synthesis and utility of fluorogenic acetoxymethyl ethers. *Chem. Sci.* **2**, 521-530 (2011).
